# Supplementary material for: Two general designs for fluidic batteries in paper-based microfluidic devices that provide predictable and tunable sources of power for on-chip assays
Source: Royal Society of Chemistry journal article supplement (doi:10.1039/c3ra40701b), 2013-01-01
Supplement: c3ra40701b.pdf [file c3ra40701b.pdf]

# Two General Designs for Fluidic Batteries in Paper-Based Microfluidic Devices That Provide Predictable and Tunable Sources of Power for On-Chip Assays

Nicole K. Thom, Gregory G. Lewis, Matthew J. DiTucci, and Scott T. Phillips\*

Department of Chemistry, The Pennsylvania State University, University Park, Pennsylvania  
16802, United States

\*Corresponding author E-mail: sphillips@psu.edu

## Supporting Information

### Table of Contents

|                                                                                                                                                                     |     |
|---------------------------------------------------------------------------------------------------------------------------------------------------------------------|-----|
| 1. Materials                                                                                                                                                        | S2  |
| 2. General procedure for fabricating paper microfluidic devices with fluidic batteries                                                                              | S2  |
| 3. General procedure for measuring current and potential                                                                                                            | S3  |
| 4. Single cell battery depicted in Fig. 1                                                                                                                           | S3  |
| Layout of the device (Fig. S1)                                                                                                                                      |     |
| Fabrication procedure                                                                                                                                               |     |
| 5. Devices and tabulated data corresponding to Fig. 2                                                                                                               | S4  |
| Layout of the devices (Fig. S2)                                                                                                                                     |     |
| Fabrication procedure                                                                                                                                               |     |
| Method for testing the devices in Fig. 2                                                                                                                            |     |
| Tables of primary data corresponding to the effects of electrode area on the short circuit current values (Fig. 2)                                                  |     |
| 6. Devices and tabulated data corresponding to Fig. 3                                                                                                               | S9  |
| Layout of the device (Fig. S3)                                                                                                                                      |     |
| Fabrication procedure                                                                                                                                               |     |
| Method for testing the devices in Fig. 3                                                                                                                            |     |
| Tables of primary data corresponding to the effect of the quantity of electrolyte per volume of paper on the short circuit current value and the current decay rate | S10 |
| 7. Effect of the quantity of salt in the salt bridge on the conductivity of the bridge                                                                              | S11 |
| Method for testing the conductivity                                                                                                                                 |     |
| Fig. S4: relationship between conductivity and the quantity of NaNO <sub>3</sub> in the salt bridge                                                                 | S12 |
| Tables of primary data corresponding to Fig. S4                                                                                                                     | S12 |
| 8. Effect of the volume of the salt bridge on the short circuit current (data corresponding to Fig. 4)                                                              | S13 |
| Layout of the devices                                                                                                                                               |     |
| Fabrication procedure                                                                                                                                               |     |
| Method for testing the devices                                                                                                                                      | S14 |
| Tables of primary data corresponding to Fig. 4                                                                                                                      | S14 |
| 9. Relationship between length of a salt bridge and resistance                                                                                                      | S16 |

|                                                                                     |     |
|-------------------------------------------------------------------------------------|-----|
| Fig. S7 relating resistance to the length of the salt bridge                        |     |
| Table of primary data corresponding to Fig. S7                                      |     |
| 10. Fluidic batteries Design Type 1 corresponding to Fig. 6                         | S17 |
| Layout of the devices described in Fig. 6 (Figs. S8 –S17)                           |     |
| Tables of primary data corresponding to Fig. 6                                      | S27 |
| Derivation of the equation for predicting the maximum current<br>(i.e., eqn (5))    | S35 |
| Derivation of the equation for predicting the current decay rate<br>(i.e., eqn (6)) | S36 |
| 11. Fluidic batteries Design Type 2 corresponding to Fig. 8                         | S38 |
| Layout of the devices described in Fig. 8 (Figs. S18–S32)                           |     |
| Tables of primary data corresponding to Fig. 8                                      | S53 |
| Derivation of the equation for predicting the maximum current<br>(i.e., eqn (8))    | S65 |
| Derivation of the equation for predicting the current decay rate<br>(i.e., eqn (9)) | S66 |
| 12. References                                                                      | S67 |

## Materials

Sodium nitrate, aluminum metal, silver metal, silver nitrate, and anhydrous aluminum chloride were purchased commercially and used without further purification. The paper used was Whatman Chromatography Paper Grade 1, and the tape was Ace Hardware Plastic carpet tape (part # 50106). All solutions were prepared using deionized water. The technicloth used was TechniCloth®11(TX®1109, Wipers (Blend), 45% polyester/55% cellulose, 23 cm × 23 cm). The copper tape (6.3 mm wide, 0.04 mm thick copper, product # 16072) was purchased from TedPella.com.

## General Procedure for Fabricating Fluidic Batteries in Paper-Based Microfluidic Devices

**Patterning paper.** The paper was patterned according to the procedure described by Noh.<sup>1</sup> The only variation made was heating the paper for 105 seconds rather than 120 s after printing wax on the paper using a wax printer.

**Patterning tape.** The tape was patterned according to the procedure described by Noh.<sup>1</sup>

**Fabricating 3D  $\mu$ PADs.** The general procedure for assembling the devices is described in Refs. 1 and 2. Specific variations of that procedure are described below as follows: the salt bridges were prepared by spotting 0.375  $\mu$ L of saturated aqueous NaNO<sub>3</sub> solution twice into a designated hydrophilic region of paper, and by drying the wet paper under vacuum for 30 min after each application. The electrolytes, 0.25  $\mu$ L each of 1 M AlCl<sub>3</sub> and 3 M AgNO<sub>3</sub>, were spotted and allowed to dry under vacuum for 30 min. After each layer was dried, the layers were cut to size using scissors. The holes in the inner layers of tape in the devices were filled with technicloth that had dimensions equal to the size of the holes unless otherwise noted. The assembled 3D  $\mu$ PADs were compressed using a 4.9 kg weight for approximately 15 minutes. The electrode layer contained pieces of aluminum and silver metal (0.25 mm thick) cut to dimensions equal to the size of the holes

in the tape. After placing the metal into the holes, the holes were covered using copper tape; the figures indicate whether a single piece of copper tape was used to cover both electrodes, or whether individual pieces of copper tape covered each electrode.

## General Procedure for Measuring Open Circuit Voltages and Short Circuit Currents

The short circuit current and open circuit voltage measurements were made using a Commercial Electric Digital Multimeter MAS830B, which can be purchased from a variety of stores, including home improvement centers.

### A Single Cell Fluidic Battery That Corresponds to Figure 1

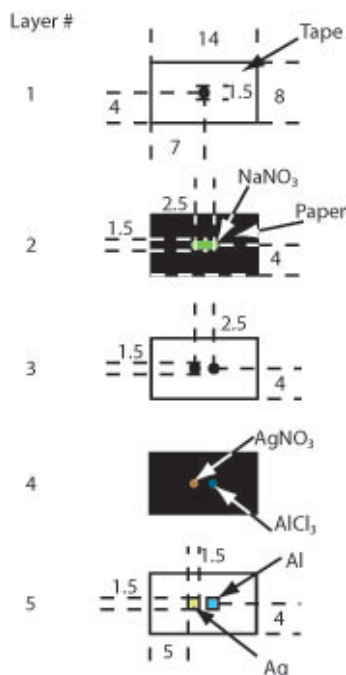

**Figure S1.** Expanded view of a single cell battery with a  $0.99 \text{ mm}^3$  salt bridge. The device is 14-mm wide  $\times$  8-mm long. All values listed are in mm.

#### Fabrication of a single cell battery.

This device was designed as shown in Figure S1, with the salt bridge in layer 2 and the electrolytes in layer 4, which were prepared as described above. Aluminum and silver metal pieces were placed in the holes in layer 5. Copper tape was placed over the pieces of metal to hold them in place. When testing this design, a multimeter was connected (using alligator clips) to the pieces of copper tape, and 5  $\mu\text{L}$  of deionized water was deposited onto the sample input region in layer 1.

## Devices and Tabulated Data Used for Fig. 2

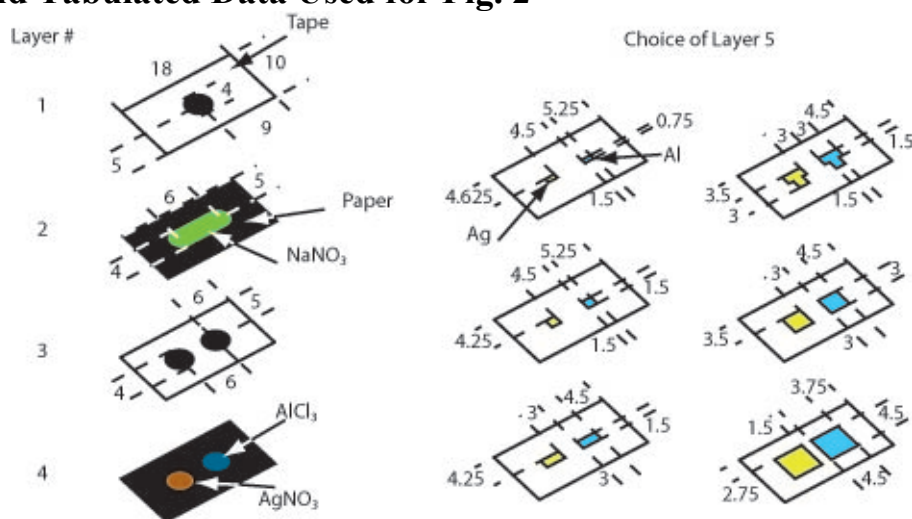

**Figure S2.** Expanded view of a single cell battery used for testing the batteries with various electrode areas. Layer 5 has several options shown for the different devices tested. The device is 18-mm wide  $\times$  10-mm long. All values listed are in mm.

### Fabrication of the devices in Figure S2.

These devices were fabricated as described above, with the exception that 5  $\mu$ L of saturated  $\text{NaNO}_3$  was spotted onto the salt bridge in layer 2, and 1.75  $\mu$ L each of 1 M  $\text{AlCl}_3$  and 3 M  $\text{AgNO}_3$  were spotted into the electrolyte regions in layer 4. The metal pieces were cut to fit the size of the holes in layer 5 using scissors, and Cu tape was placed over the metal pieces.

**Method for testing the effects of the area of the electrodes using the devices in Figure S2.** These devices were tested by connecting alligator clips onto the pieces of Cu tape without adding pressure onto the Al and Ag pieces. The device was arranged so that it was not bent, and the alligator clips were attached to the multimeter to monitor the current or potential. The devices were started using by addition of 10  $\mu$ L deionized water.

**Tables of data using the devices shown in Figure S2. This data was used to create the graph in Figure 2:**

**Table S1.** Data collected for 1.125 mm<sup>2</sup> electrodes.

| Time<br>(min) | Current ( $\mu$ A) |         |         |         |
|---------------|--------------------|---------|---------|---------|
|               | Trial 1            | Trial 2 | Trial 3 | Trial 4 |
| 0             | 0                  | 0       | 0       | 0       |
| 0.25          | -                  | 1480    | 1370    | -       |
| 0.5           | 1550               | 1350    | 1360    | 1310    |
| 0.75          | 1420               | 1280    | 1200    | 1250    |
| 1             | 1270               | 1210    | 1120    | 1200    |
| 1.25          | 1170               | 1150    | 950     | 1160    |
| 1.5           | 1090               | 1050    | 880     | 1070    |
| 1.75          | 1030               | 1030    | -       | -       |
| 2             | 970                | 1000    | 860     | 960     |
| 2.25          | 900                | 950     | -       | -       |

**Table S1 Continued.** Data collected for 1.125 mm<sup>2</sup> electrodes.

| Time<br>(min) | Current (μA) |         |         |         |
|---------------|--------------|---------|---------|---------|
|               | Trial 1      | Trial 2 | Trial 3 | Trial 4 |
| 2.5           | 850          | 970     | -       | -       |
| 2.75          | 810          | -       | -       | -       |
| 3             | 790          | -       | -       | -       |
| 3.25          | 760          | -       | -       | -       |
| 3.5           | 750          | -       | -       | -       |
| 3.75          | 730          | -       | -       | -       |
| 4             | 680          | -       | -       | -       |
| 4.25          | 670          | -       | -       | -       |
| 4.5           | 650          | -       | -       | -       |
| 4.75          | -            | -       | -       | -       |
| 5             | 600          | -       | -       | -       |

**Table S2.** Data collected for 2.25 mm<sup>2</sup> electrodes.

| Time<br>(min) | Current (μA) |         |         |         | Potential (V) |         |         |
|---------------|--------------|---------|---------|---------|---------------|---------|---------|
|               | Trial 1      | Trial 2 | Trial 3 | Trial 4 | Trial 1       | Trial 2 | Trial 3 |
| 0             | 0.00         | 0.00    | 0.00    | 0.00    | 0.00          | 0.00    | 0.00    |
| 0.25          | 1570         | 1760    | 1950    | 1780    | 1.35          | 1.31    | 1.35    |
| 0.5           | 1720         | 2030    | 2010    | 1940    | 1.34          | 1.31    | 1.31    |
| 0.75          | 1650         | 2110    | 1830    | 1920    | 1.30          | 1.26    | 1.26    |
| 1             | 1550         | 2070    | 1600    | 1780    | 1.25          | 1.22    | 1.24    |
| 1.25          | 1460         | -       | -       | 1600    | 1.21          | 1.20    | 1.25    |
| 1.5           | 1360         | -       | -       | -       | 1.19          | 1.17    | 1.21    |
| 1.75          | 1220         | -       | -       | -       | 1.17          | 1.16    | 1.20    |
| 2             | 1150         | -       | -       | -       | 1.17          | 1.15    | 1.16    |
| 2.25          | 1080         | -       | -       | -       | 1.16          | 1.13    | 1.10    |
| 2.5           | 1000         | -       | -       | -       | 1.15          | 1.13    | 1.13    |
| 2.75          | -            | -       | -       | -       | 1.15          | -       | 1.12    |
| 3             | -            | -       | -       | -       | 1.15          | 1.02    | 1.12    |
| 3.25          | -            | -       | -       | -       | 1.15          | 1.08    | 1.11    |
| 3.5           | -            | -       | -       | -       | 1.14          | 1.07    | 1.10    |
| 3.75          | -            | -       | -       | -       | 1.13          | 1.06    | 1.11    |
| 4             | -            | -       | -       | -       | 1.13          | 1.05    | 1.09    |
| 4.25          | -            | -       | -       | -       | 1.11          | 1.04    | 1.07    |
| 4.5           | -            | -       | -       | -       | 1.11          | 1.04    | 1.06    |
| 4.75          | -            | -       | -       | -       | 1.10          | 1.03    | 1.05    |
| 5             | -            | -       | -       | -       | 1.10          | 1.03    | 1.05    |

**Table S3.** Data collected for 4.5 mm<sup>2</sup> electrodes.

| Time<br>(min) | Current (μA) |         |         | Potential (V) |         |         |
|---------------|--------------|---------|---------|---------------|---------|---------|
|               | Trial 1      | Trial 2 | Trial 3 | Trial 1       | Trial 2 | Trial 3 |
| 0             | 0.00         | 0.00    | 0.00    | 0.00          | 0.00    | 0.00    |
| 0.25          | 2030         | 1930    | 1860    | 1.33          | 1.34    | 1.36    |

**Table S3 Continued.** Data collected for 4.5 mm<sup>2</sup> electrodes.

| Time<br>(min) | Current (μA) |         |         | Potential (V) |         |         |
|---------------|--------------|---------|---------|---------------|---------|---------|
|               | Trial 1      | Trial 2 | Trial 3 | Trial 1       | Trial 2 | Trial 3 |
| 0.5           | 2170         | 2080    | 1960    | 1.37          | 1.31    | 1.34    |
| 0.75          | 2200         | 2100    | 1960    | 1.34          | 1.29    | 1.34    |
| 1             | 2090         | 2020    | 1870    | 1.33          | 1.28    | 1.33    |
| 1.25          | 2020         | 1960    | 1900    | 1.31          | 1.27    | 1.31    |
| 1.5           | -            | -       | -       | 1.29          | 1.24    | 1.29    |
| 1.75          | -            | -       | -       | 1.27          | 1.23    | 1.28    |
| 2             | -            | -       | -       | 1.25          | 1.22    | 1.25    |
| 2.25          | -            | -       | -       | 1.23          | -       | 1.19    |
| 2.5           | -            | -       | -       | 1.21          | 1.19    | 1.20    |
| 2.75          | -            | -       | -       | 1.20          | 1.16    | 1.20    |
| 3             | -            | -       | -       | 1.18          | 1.15    | 1.17    |
| 3.25          | -            | -       | -       | 1.14          | 1.18    | 1.16    |
| 3.5           | -            | -       | -       | 1.14          | 1.17    | 1.09    |
| 3.75          | -            | -       | -       | 1.12          | 1.18    | 1.13    |
| 4             | -            | -       | -       | 1.11          | 1.17    | 1.12    |
| 4.25          | -            | -       | -       | 1.10          | 1.15    | 1.11    |
| 4.5           | -            | -       | -       | 1.10          | -       | 1.12    |
| 4.75          | -            | -       | -       | 1.10          | 1.10    | 1.12    |
| 5             | -            | -       | -       | 1.09          | 1.15    | 1.11    |

**Table S4.** Data collected for 6.75 mm<sup>2</sup> electrodes.

| Time<br>(min) | Current (μA) |         |         |         | Potential (V) |         |         |
|---------------|--------------|---------|---------|---------|---------------|---------|---------|
|               | Trial 1      | Trial 2 | Trial 3 | Trial 4 | Trial 1       | Trial 2 | Trial 3 |
| 0             | 0            | 0       | 0       | 0       | 0.00          | 0.00    | 0.00    |
| 0.25          | 1750         | 1860    | 1990    | 1800    | 1.36          | 1.35    | 1.33    |
| 0.5           | 2000         | 2240    | 2000    | 1910    | 1.34          | 1.34    | 1.33    |
| 0.75          | 2400         | 2280    | 1990    | 1730    | 1.32          | 1.33    | 1.29    |
| 1             | 2350         | 2140    | 1930    | 1930    | 1.31          | 1.32    | 1.26    |
| 1.25          | 2260         | 2020    | 1820    | 1900    | 1.29          | 1.30    | 1.24    |
| 1.5           | 2110         | 1910    | 1780    | 1830    | 1.27          | 1.29    | 1.25    |
| 1.75          | 2040         | 1850    | 1690    | 1750    | 1.27          | 1.29    | 1.22    |
| 2             | 1950         | 1770    | 1650    | 1630    | 1.24          | 1.26    | 1.18    |
| 2.25          | 1890         | 1770    | 1580    | 1580    | 1.23          | 1.24    | 1.19    |
| 2.5           | 1830         | 1660    | 1540    | 1450    | 1.22          | 1.23    | 1.20    |
| 2.75          | 1730         | 1630    | 1490    | 1410    | 1.20          | 1.23    | 1.21    |
| 3             | 1670         | 1409    | 1460    | 1410    | 1.21          | 1.20    | 1.14    |
| 3.25          | 1630         | 1360    | 1450    | 1390    | 1.20          | 1.20    | 1.14    |
| 3.5           | 1550         | 1300    | 1420    | 1350    | 1.21          | 1.18    | 1.13    |
| 3.75          | 1480         | 1270    | 1390    | 1330    | 1.14          | 1.18    | 1.14    |
| 4             | 1430         | 1220    | 1350    | 1280    | 1.15          | 1.18    | 1.12    |
| 4.25          | 1350         | 1185    | 1200    | 1175    | 1.14          | 1.17    | 1.11    |
| 4.5           | 1290         | 1130    | 1160    | 1130    | 1.08          | 1.17    | 1.11    |

**Table S4 Continued.** Data collected for 6.75 mm<sup>2</sup> electrodes.

| Time<br>(min) | Current (μA) |         |         |         | Potential (V) |         |         |
|---------------|--------------|---------|---------|---------|---------------|---------|---------|
|               | Trial 1      | Trial 2 | Trial 3 | Trial 4 | Trial 1       | Trial 2 | Trial 3 |
| 4.75          | 1170         | 1075    | 1120    | 1090    | 1.09          | 1.116   | 1.10    |
| 5             | 290          | 1012    | 1064    | 1060    | 1.09          | 1.15    | 1.09    |
| 5.25          | 200          | 965     | 978     | 1020    | -             | -       | -       |
| 5.5           | 175          | 900     | 960     | 945     | -             | -       | -       |
| 5.75          | 162          | 450     | 890     | 915     | -             | -       | -       |
| 6             | 153          | 162     | 480     | 715     | -             | -       | -       |
| 6.25          | 146          | 130     | 200     | 350     | -             | -       | -       |
| 6.5           | 141          | 110     | 160     | 195     | -             | -       | -       |
| 6.75          | 138          | 101     | 145     | 165     | -             | -       | -       |
| 7             | 135          | 97      | 129     | 150     | -             | -       | -       |
| 7.25          | 129          | 95      | 120     | 140     | -             | -       | -       |
| 7.5           | 125          | 90      | 117     | 132     | -             | -       | -       |

**Table S5.** Data collected for 9 mm<sup>2</sup> electrodes.

| Time<br>(min) | Current (μA) |         |         |         | Potential (V) |         |         |
|---------------|--------------|---------|---------|---------|---------------|---------|---------|
|               | Trial 1      | Trial 2 | Trial 3 | Trial 4 | Trial 1       | Trial 2 | Trial 3 |
| 0             | 0            | 0       | 0       | 0       | 0.00          | 0.00    | 0.00    |
| 0.25          | 1880         | 1730    | 1870    | 1900    | 1.33          | 1.35    | 1.36    |
| 0.5           | 2030         | 1940    | 2170    | 2120    | 1.33          | 1.34    | 1.35    |
| 0.75          | 2100         | 2030    | 2240    | 2190    | 1.32          | 1.32    | 1.33    |
| 1             | 2040         | 1920    | 2200    | 2130    | 1.31          | 1.31    | 1.32    |
| 1.25          | 1950         | 1850    | 2090    | 2070    | 1.29          | 1.30    | 1.30    |
| 1.5           | 1850         | 1780    | 2000    | 1980    | 1.27          | 1.28    | 1.28    |
| 1.75          | 1820         | 1730    | 1930    | 1930    | 1.26          | 1.26    | 1.26    |
| 2             | 1760         | 1670    | 1860    | 1870    | 1.24          | 1.24    | 1.24    |
| 2.25          | 1690         | 1620    | 1810    | 1790    | 1.21          | 1.24    | 1.22    |
| 2.5           | 1600         | 1580    | 1780    | 1760    | 1.22          | 1.22    | 1.26    |
| 2.75          | 1580         | 1530    | 1720    | 1720    | 1.21          | 1.24    | 1.26    |
| 3             | 1550         | 1490    | 1680    | 1640    | 1.21          | 1.21    | 1.24    |
| 3.25          | 1460         | 1460    | 1610    | 1610    | 1.20          | 1.20    | 1.23    |
| 3.5           | 1420         | 1430    | 1560    | 1550    | 1.20          | 1.20    | 1.21    |
| 3.75          | 1370         | 1400    | 1480    | 1490    | 1.19          | 1.17    | 1.23    |
| 4             | 1340         | 1350    | 1450    | 1420    | 1.18          | 1.20    | 1.19    |
| 4.25          | 1280         | 1330    | 1380    | 1390    | 1.18          | 1.19    | 1.22    |
| 4.5           | 1210         | 1270    | 1360    | 1340    | 1.19          | 1.18    | 1.22    |
| 4.75          | 1130         | 1210    | 1250    | 1280    | 1.20          | 1.18    | 1.22    |
| 5             | 1100         | 1150    | 960     | 1090    | 1.19          | 1.17    | 1.22    |
| 5.25          | 1030         | 1060    | 190     | 240     | -             | -       | -       |
| 5.5           | 660          | 700     | 130     | 130     | -             | -       | -       |
| 5.75          | 210          | 190     | 100     | 100     | -             | -       | -       |
| 6             | 160          | 130     | 90      | 90      | -             | -       | -       |
| 6.25          | 140          | 100     | 80      | 80      | -             | -       | -       |

**Table S5 Continued.** Data collected for 9 mm<sup>2</sup> electrodes.

| Time<br>(min) | Current (μA) |         |         |         | Potential (V) |         |         |
|---------------|--------------|---------|---------|---------|---------------|---------|---------|
|               | Trial 1      | Trial 2 | Trial 3 | Trial 4 | Trial 1       | Trial 2 | Trial 3 |
| 6.5           | 130          | 90      | 80      | 70      | -             | -       | -       |
| 6.75          | 120          | 80      | 70      | 60      | -             | -       | -       |
| 7             | 120          | 80      | 70      | 60      | -             | -       | -       |
| 7.25          | 110          | 70      | 60      | 60      | -             | -       | -       |
| 7.5           | 110          | 70      | 60      | 60      | -             | -       | -       |

**Table S6.** Data collected for 20.25 mm<sup>2</sup> electrodes.

| Time<br>(min) | Current (μA) |         |         |         |         | Potential (V) |         |         |
|---------------|--------------|---------|---------|---------|---------|---------------|---------|---------|
|               | Trial 1      | Trial 2 | Trial 3 | Trial 4 | Trial 5 | Trial 1       | Trial 2 | Trial 3 |
| 0             | 0.00         | 0.00    | 0.00    | 0.00    | 0.00    | 0.00          | 0.00    | 0.00    |
| 0.25          | 1800         | 2030    | 1980    | 1820    | 1790    | 1.33          | -       | 1.34    |
| 0.5           | 1960         | 2120    | 2050    | 1930    | 1870    | 1.32          | 1.33    | 1.32    |
| 0.75          | 1960         | 2090    | 2060    | 1910    | 1890    | 1.29          | 1.31    | 1.30    |
| 1             | 1930         | 2040    | 2010    | 1880    | 1920    | 1.26          | 1.29    | 1.28    |
| 1.25          | 1890         | 1980    | 1980    | 1830    | 1900    | 1.25          | 1.27    | 1.26    |
| 1.5           | 1840         | 1960    | 1960    | 1760    | 1850    | 1.25          | 1.24    | 1.21    |
| 1.75          | 1800         | 1900    | 1850    | 1720    | 1780    | 1.24          | 1.23    | 1.18    |
| 2             | 1760         | 1860    | 1840    | 1680    | 1730    | 1.23          | 1.20    | 1.22    |
| 2.25          | 1730         | 1810    | 1790    | 1620    | 1680    | 1.21          | 1.21    | 1.19    |
| 2.5           | 1700         | 1760    | 1760    | 1600    | 1600    | 1.20          | 1.18    | 1.15    |
| 2.75          | 1660         | 1730    | 1690    | 1570    | 1580    | 1.18          | 1.17    | 1.10    |
| 3             | 1620         | 1670    | 1640    | 1550    | 1530    | 1.20          | 1.16    | 1.13    |
| 3.25          | 1590         | 1640    | 1620    | 1530    | 1510    | 1.17          | 1.16    | 1.13    |
| 3.5           | 1550         | 1570    | 1590    | 1510    | 1490    | 1.17          | 1.15    | 1.12    |
| 3.75          | 1520         | 1550    | 1540    | 1490    | 1420    | 1.15          | 1.15    | -       |
| 4             | 1490         | 1520    | 1520    | 1480    | 1390    | 1.15          | 1.15    | 1.12    |
| 4.25          | 1460         | 1470    | 1470    | 1460    | 1360    | 1.14          | 1.16    | 1.13    |
| 4.5           | 1450         | 1440    | 1450    | 1450    | 1340    | 1.14          | 1.16    | 1.13    |
| 4.75          | 1420         | 1440    | 1430    | 1430    | 1330    | 1.15          | 1.15    | 1.14    |
| 5             | 1400         | 1300    | 1390    | 1420    | 1330    | 1.18          | 1.14    | 1.13    |

### Four-Cell Battery Corresponding to Figure 3

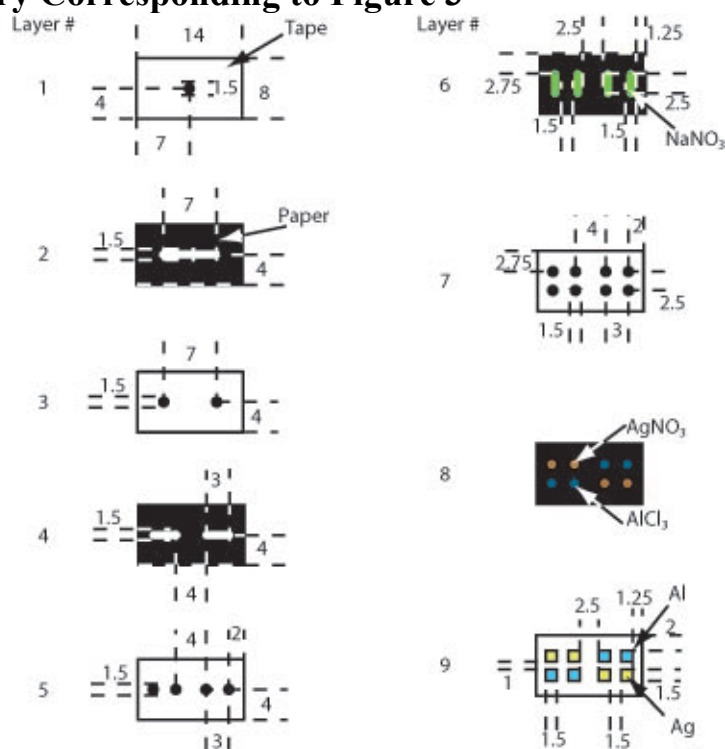

**Figure S3.** Expanded view of a 4-cell battery. All values shown are in millimeters. The device is 14-mm wide  $\times$  8-mm long.

#### Fabrication of a 4-cell battery.

The four-cell devices were fabricated as described above. The  $\text{NaNO}_3$  was spotted in the salt bridge in layer 6, and the electrolytes were spotted in layer 8. The metal pieces were placed in the holes in layer 9, and Cu tape was cut and placed over the metal pieces. The alignment of the Cu tape to connect the different cells together can be seen in Figure 3. To test different electrolyte concentrations, the devices were made using 0.5 and 3 M  $\text{AgNO}_3$  with 0.167 and 1 M  $\text{AlCl}_3$ , respectively.

**Method for testing the effects of electrolyte concentration.** These devices were tested by connecting alligator clips to the pieces of Cu tape without adding pressure to the Al and Ag pieces. The alligator clips were then connected to the multimeter and either potential or current was monitored. The devices were started using 10  $\mu\text{L}$  deionized water.

Tables of data using the devices shown in Figure S3. This data was used in the section entitled “Quantity of electrolyte per volume of paper”.

**Table S7.** Data collected for four-cell devices made using 0.33 M AgNO<sub>3</sub> and 0.11 M AlCl<sub>3</sub> (i.e., 44.5 µg of AgNO<sub>3</sub>/mm<sup>3</sup> of paper).

| Time (min) | Current (µA) |         |         |         | Potential (V) |
|------------|--------------|---------|---------|---------|---------------|
|            | Trial 1      | Trial 2 | Trial 3 | Trial 4 | Trial 1       |
| 0          | 0            | 0       | 0       | 0       | 0             |
| 0.5        | 0            | 0       | 0       | 0       | 0             |
| 1          | 0            | 0       | 0       | 0       | 0             |
| 1.5        | 0            | 0       | 0       | 0       | 0             |
| 2          | 0            | 0       | 0       | 0       | 0             |
| 1.5        | 0            | 0       | 0       | 0       | 0             |
| 3          | 0            | 0       | 0       | 0       | 0             |
| 3.5        | 0            | 0       | 0       | 0       | 0.5           |
| 4          | 0            | 0       | 0       | 0.01    | 1.3           |
| 4.5        | 0            | 0.01    | 0.01    | 0.02    | 1.93          |
| 5          | 0.02         | 0.03    | 0.02    | 0.08    | 2.2           |
| 5.5        | 0.11         | 0.14    | 0.06    | 0.12    | 2.46          |
| 6          | 0.18         | 0.24    | 0.07    | 0.18    | 2.48          |
| 6.5        | 0.13         | 0.21    | 0.16    | 0.21    | 2.45          |
| 7          | 0.12         | 0.15    | 0.17    | 0.15    | 2.44          |
| 7.5        | 0.10         | 0.09    | 0.12    | 0.12    | 2.4           |
| 8          | 0.14         | 0.07    | 0.10    | 0.09    | 2.35          |
| 8.5        | 0.12         | 0.06    | 0.08    | 0.08    | 2.35          |
| 9          | 0.08         | 0.05    | 0.07    | 0.07    | 2.3           |
| 9.5        | 0.07         | 0.04    | 0.07    | 0.06    | 2.26          |
| 10         | 0.06         | 0.05    | 0.06    | 0.06    | 2.23          |
| 11         | 0.05         | 0.05    | 0.04    | 0.05    | 2.2           |
| 12         | 0.04         | 0.04    | 0.03    | 0.04    | 2.19          |
| 13         | 0.04         | 0.04    | 0.03    | 0.03    | 2.17          |
| 14         | 0.03         | 0.03    | 0.03    | 0.03    | 2.1           |
| 15         | 0.03         | 0.03    | 0.03    | 0.03    | 2.09          |

**Table S8.** Data collected for four-cell devices made using 3 M AgNO<sub>3</sub> and 1 M AlCl<sub>3</sub> (i.e., 400 µg of AgNO<sub>3</sub>/mm<sup>3</sup> of paper)

| Time (min) | Current (µA) |         |         |         |         | Potential (V) |         |         |         |
|------------|--------------|---------|---------|---------|---------|---------------|---------|---------|---------|
|            | Trial 1      | Trial 2 | Trial 3 | Trial 4 | Trial 5 | Trial 1       | Trial 2 | Trial 3 | Trial 4 |
| 0          | 0            | 0       | 0       | 0       | 0       | 0.00          | 0.00    | 0.00    | 0.00    |
| 0.5        | 0            | 0       | 0       | 0       | 0       | 0.00          | 0.00    | 0.00    | 0.00    |
| 1          | 0            | 0       | 0       | 0       | 0       | 0.00          | 0.00    | 0.00    | 0.00    |
| 1.5        | 0            | 0       | 0       | 0       | 0       | 0.00          | 0.00    | 0.00    | 0.00    |
| 2          | 0            | 0       | 0       | 0       | 0       | 0.00          | 0.00    | 0.00    | 0.00    |
| 2.5        | 0            | 0       | 0       | 0       | 0       | 0.00          | 0.00    | 0.00    | 0.00    |
| 3          | 0            | 0       | 0       | 0       | 99      | 0.00          | 0.00    | 0.00    | 0.00    |
| 3.5        | 6            | 0       | 102     | 120     | 350     | 0.50          | 0.99    | 0.00    | 1.00    |

**Table S8 Continued.** Data collected for four-cell devices made using 3 M AgNO<sub>3</sub> and 1 M AlCl<sub>3</sub> (i.e., 400 µg of AgNO<sub>3</sub>/mm<sup>3</sup> of paper).

| Time<br>(min) | Current (µA) |         |         |         |         | Potential (V) |         |         |         |
|---------------|--------------|---------|---------|---------|---------|---------------|---------|---------|---------|
|               | Trial 1      | Trial 2 | Trial 3 | Trial 4 | Trial 5 | Trial 1       | Trial 2 | Trial 3 | Trial 4 |
| 4             | 53           | 9       | 180     | 184     | 530     | 2.00          | 1.79    | 0.15    | 2.47    |
| 4.5           | 260          | 59      | 290     | 226     | 590     | 2.17          | 2.16    | 0.95    | 2.50    |
| 5             | 302          | 325     | 476     | 262     | 611     | 2.28          | 2.45    | 1.74    | 2.49    |
| 5.5           | 360          | 450     | 550     | 300     | 700     | 2.40          | 2.48    | 2.35    | 2.47    |
| 6             | 450          | 520     | 590     | 430     | 730     | 2.24          | 2.46    | 2.39    | 2.46    |
| 6.5           | 500          | 545     | 588     | 475     | 756     | 2.18          | 2.45    | 2.38    | 2.47    |
| 7             | 640          | 570     | 600     | 505     | 710     | 2.46          | 2.45    | 2.27    | 2.46    |
| 7.5           | 640          | 575     | 595     | 507     | 530     | 2.40          | 2.44    | 2.40    | 2.42    |
| 8             | 660          | 560     | 570     | 515     | 432     | 2.40          | 2.43    | 2.46    | 2.43    |
| 8.5           | 590          | 566     | 430     | 510     | 120     | 2.20          | 2.38    | 2.24    | 2.42    |
| 9             | 395          | 550     | 290     | 495     | 100     | 2.30          | 2.39    | 2.45    | 2.40    |
| 9.5           | 376          | 510     | 280     | 280     | 80      | 2.17          | 2.43    | 2.35    | 2.35    |
| 10            | 340          | 440     | 220     | 165     | 88      | 2.31          | 2.44    | 2.33    | 2.35    |
| 11            | 178          | 190     | 155     | 107     | 83      | 2.33          | 2.46    | 2.39    | 2.33    |
| 12            | 103          | 130     | 150     | 88      | 79      | 2.30          | 2.48    | 2.37    | 2.31    |
| 13            | 89           | 132     | 120     | 66      | 74      | 2.12          | 2.44    | 2.34    | 2.30    |
| 14            | 81           | 95      | 88      | 61      | 69      | 2.30          | 2.34    | 2.36    | 2.25    |
| 15            | 77           | 65      | 53      | 58      | 65      | 2.25          | 2.43    | 2.32    | 2.21    |
| 16            | 72           | 61      | 47      | 56      | 62      | 2.01          | 2.38    | 2.28    | 2.27    |
| 17            | 67           | 48      | 46      | 54      | 59      | 2.07          | 2.39    | 2.20    | 2.26    |
| 18            | 65           | 47      | 44      | 46      | 56      | 2.00          | 2.36    | 2.20    | 2.23    |
| 19            | 59           | 46      | 42      | 45      | 54      | 1.98          | 2.32    | 2.15    | 2.26    |
| 20            | 57           | 46      | 40      | 45      | 52      | 2.07          | 2.30    | 2.25    | 2.23    |

## Effect of the Quantity of Salt in the Salt Bridge on the Conductivity

**Procedure for measuring the conductivity of the salt bridge.** Conductance was measured using layer 2 (Figure S2). The paper had 5 µL of salt solution spotted onto it and was allowed to dry under vacuum for 30 min. The salt solutions used were 12.56 M KNO<sub>3</sub>, 9.39 M KNO<sub>3</sub>, 6.33 M KNO<sub>3</sub>, 3.07 M KNO<sub>3</sub>, 36.47 M NaNO<sub>3</sub>, 27.35 M NaNO<sub>3</sub>, 18.24 M NaNO<sub>3</sub>, and 9.12 M NaNO<sub>3</sub>. After drying, the paper layers had a solid piece of tape placed across the back. The salt bridge then had 5 µL of deionized water added to it. At 50 s the conductance was measured using a modified Omega CDH-7X conductivity meter. The meter was modified by adding clips to each of the probes and 3" copper wires to the end of the clips. The wires were taped about ½ an inch from the ends to hold them approximately 1 cm apart. The conductivity meter was placed on the center of the salt bridge for 45 s and allowed to come to equilibrium before recording the value at 50 s.

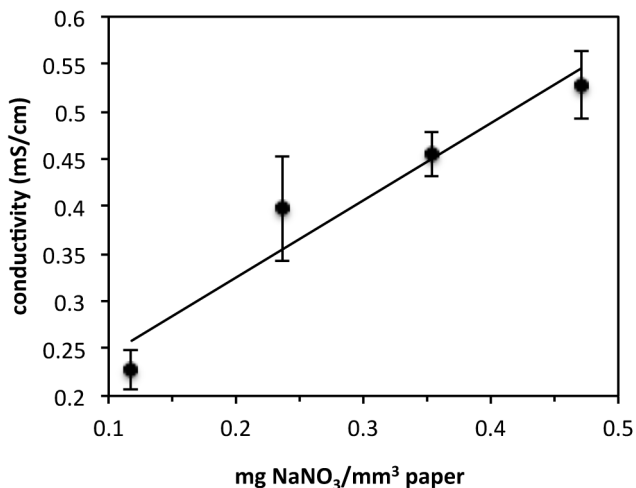

**Figure S4.** Conductivity of the salt bridge as a function of the quantity of NaNO<sub>3</sub> in the bridge. The data are the average of 4 trials.

**Table S9.** Data collected for the Salt Bridge Conductance measurements. The NaNO<sub>3</sub> data is plotted in Figure S4.

| Salt              | Concentration<br>(mg/mm <sup>3</sup> ) | Conductivity (mS/cm) |        |         |         |
|-------------------|----------------------------------------|----------------------|--------|---------|---------|
|                   |                                        | Trial 1              | Trial2 | Trial 3 | Trial 4 |
| KNO <sub>3</sub>  | 0.193                                  | 0.18                 | 0.17   | 0.18    | 0.18    |
| KNO <sub>3</sub>  | 0.144                                  | 0.10                 | 0.08   | 0.13    | 0.14    |
| KNO <sub>3</sub>  | 0.0972                                 | 0.10                 | 0.09   | 0.09    | 0.09    |
| KNO <sub>3</sub>  | 0.0471                                 | 0.06                 | 0.07   | 0.06    | 0.04    |
| NaNO <sub>3</sub> | 0.471                                  | 0.51                 | 0.51   | 0.51    | 0.58    |
| NaNO <sub>3</sub> | 0.353                                  | 0.43                 | 0.44   | 0.47    | 0.48    |
| NaNO <sub>3</sub> | 0.236                                  | 0.37                 | 0.48   | 0.37    | 0.37    |
| NaNO <sub>3</sub> | 0.118                                  | 0.25                 | 0.23   | 0.23    | 0.20    |

## Effect of the Volume of the Salt Bridge on Short Circuit Current

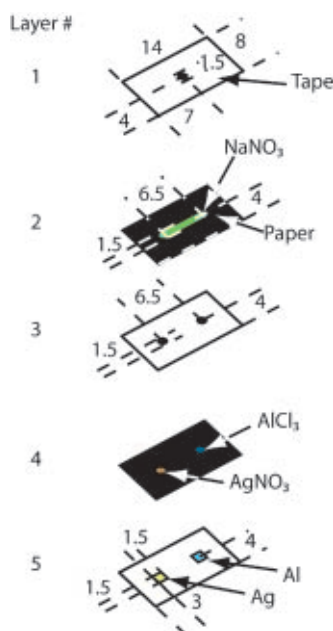

**Figure S5.** Expanded view of an example single cell battery used for testing devices with a  $2.07 \text{ mm}^3$  salt bridge. The salt bridge is 6.5 mm-long. The device is 14-mm wide  $\times$  8-mm long. All values listed are in mm.

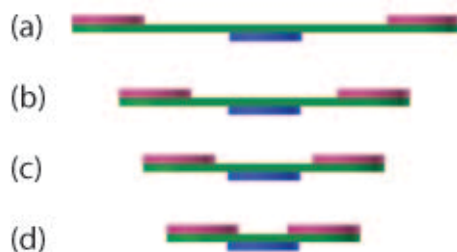

**Figure S6.** Side-view of the different salt bridges used in devices with the configuration shown in Figure S5. The only variation in the design between devices is the length of the salt bridge in layer 2. The blue region is the sample input regions (layer 1 in Fig. S5), green is the salt bridge (layer 2 in Fig. S5), and pink is the electrolyte region (layer 3 in Fig. S5). (a) The  $2.07 \text{ mm}^3$  salt bridge (6.5 mm-long), (b) the  $1.53 \text{ mm}^3$  salt bridge (4.5 mm-long), (c) the  $1.23 \text{ mm}^3$  salt bridge (3.5 mm-long), and (d) the  $0.99 \text{ mm}^3$  salt bridge (2.5 mm-long).

**Method for fabricating the devices.** These devices were fabricated as outlined on page S2, with the exception that the volume of saturated  $\text{NaNO}_3$  spotted in layer 2 was varied according to the salt bridge volume. The  $2.07 \text{ mm}^3$  salt bridge required  $1.50 \mu\text{L}$ , the  $1.53 \text{ mm}^3$  bridge required  $1.16 \mu\text{L}$ , and the  $1.23 \text{ mm}^3$  bridge used  $0.92 \mu\text{L}$  saturated  $\text{NaNO}_3$ . The electrolytes were spotted in layer 4, and the metals were cut and placed in the holes in layer 5. The metal pieces were covered with pieces of Cu tape.

**Method for measuring the current and potential.** These devices were tested by connecting alligator clips to the pieces of Cu tape without adding pressure to the Al and Ag pieces. The alligator clips were then connected to the multimeter and either potential or current was monitored. The devices were started by addition of deionized water to layer 1 with the volumes varying based on the volume of the salt bridge as follows:  $0.99 \text{ mm}^3 = 1.0 \text{ }\mu\text{L}$ ,  $1.23 \text{ mm}^3 = 1.2 \text{ }\mu\text{L}$ ,  $1.53 \text{ mm}^3 = 1.5 \text{ }\mu\text{L}$ , and  $2.07 \text{ mm}^3 = 2.0 \text{ }\mu\text{L}$ .

**Table S10.** Current and potential data for the  $2.07 \text{ mm}^3$  salt bridge.

| Time<br>(min) | Current ( $\mu\text{A}$ ) |         |         |         | Potential (mV) |         |         |
|---------------|---------------------------|---------|---------|---------|----------------|---------|---------|
|               | Trial 1                   | Trial 2 | Trial 3 | Trial 4 | Trial 1        | Trial 2 | Trial 3 |
| 0             | 0                         | 0       | 0       | 0       | 0              | 0       | 0       |
| 0.5           | 175                       | 45      | 4       | 58      | 1250           | 1261    | 1181    |
| 1             | 185                       | 125     | 16      | 98      | 1253           | 1260    | 1310    |
| 1.5           | 180                       | 138     | 53      | 106     | 1255           | 1261    | 1281    |
| 2             | 175                       | 136     | 82      | 110     | 1265           | 1250    | 1270    |
| 2.5           | 164                       | 143     | 96      | 114     | 1264           | 1246    | 1273    |
| 3             | 164                       | 142     | 100     | 113     | 1265           | 1260    | 1277    |
| 3.5           | 160                       | 140     | 102     | 112     | 1263           | 1257    | 1264    |
| 4             | 157                       | 135     | 106     | 114     | 1258           | 1246    | 1270    |
| 4.5           | 153                       | 133     | 109     | 113     | 1262           | 1265    | 1270    |
| 5             | 150                       | 136     | 106     | 112     | 1280           | 1260    | 1268    |
| 5.5           | 146                       | 130     | 107     | 113     | 1281           | 1259    | 1277    |
| 6             | 143                       | 126     | 108     | 113     | 1286           | 1240    | 1278    |
| 6.5           | 138                       | 124     | 109     | 115     | 1265           | 1265    | 1275    |
| 7             | 131                       | 132     | 110     | 116     | 1272           | 1268    | 1260    |
| 7.5           | 121                       | 129     | 111     | 116     | 1240           | 1245    | 1265    |
| 8             | 115                       | 129     | 110     | 115     | 1268           | 1260    | 1257    |
| 8.5           | 109                       | 128     | 110     | 114     | 1272           | 1250    | 1256    |
| 9             | 98                        | 124     | 110     | 115     | 1271           | 1250    | 1270    |
| 9.5           | 88                        | 123     | 110     | 114     | 1276           | 1245    | 1260    |
| 10            | 78                        | 124     | 110     | 113     | 1265           | 1240    | 1260    |

**Table S11.** Current and Potential data for the  $1.53 \text{ mm}^3$  salt bridge.

| Time<br>(min) | Current ( $\mu\text{A}$ ) |         |         |         | Potential (mV) |         |         |
|---------------|---------------------------|---------|---------|---------|----------------|---------|---------|
|               | Trial 1                   | Trial 2 | Trial 3 | Trial 4 | Trial 1        | Trial 2 | Trial 3 |
| 0             | 0                         | 0       | 0       | 0       | 0              | 0       | 0       |
| 0.5           | 398                       | 325     | 420     | 240     | 1296           | 1290    | 1296    |
| 1             | 370                       | 320     | 419     | 279     | 1307           | 1285    | 1276    |
| 1.5           | 347                       | 298     | 402     | 300     | 1299           | 1278    | 1282    |
| 2             | 322                       | 307     | 377     | 300     | 1299           | 1280    | 1270    |
| 2.5           | 312                       | 290     | 354     | 298     | 1298           | 1270    | 1274    |
| 3             | 300                       | 275     | 322     | 267     | 1288           | 1270    | 1272    |
| 3.5           | 288                       | 260     | 280     | -       | 1278           | 1260    | 1265    |
| 4             | 274                       | 245     | 170     | 257     | 1277           | 1265    | 1262    |
| 4.5           | 166                       | 232     | 51      | 245     | 1276           | 1240    | 1246    |
| 5             | 41                        | 202     | 36      | 222     | 1260           | 1217    | 1244    |
| 5.5           | 32                        | 107     | 32      | 65      | 1259           | 1215    | 1237    |

**Table S11 Continued.** Data collected for four-cell devices made using 3 M AgNO<sub>3</sub> and 1 M AlCl<sub>3</sub> (i.e., 400 µg of AgNO<sub>3</sub>/mm<sup>3</sup> of paper).

| Time<br>(min) | Current (µA) |         |         |         | Potential (mV) |         |         |
|---------------|--------------|---------|---------|---------|----------------|---------|---------|
|               | Trial 1      | Trial 2 | Trial 3 | Trial 4 | Trial 1        | Trial 2 | Trial 3 |
| 6             | 29           | 40      | 28      | 44      | 1225           | 1250    | 1235    |
| 6.5           | 25           | 36      | 25      | 40      | 1238           | 1250    | 1234    |
| 7             | 26           | 33      | 23      | 38      | 1205           | 1208    | 1216    |
| 7.5           | 25           | 31      | 22      | 35      | 1202           | 1240    | 1216    |

**Table S12.** Current and potential data for the 1.23 mm<sup>3</sup> salt bridge.

| Time<br>(min) | Current (µA) |         |         |         | Potential (mV) |         |         |
|---------------|--------------|---------|---------|---------|----------------|---------|---------|
|               | Trial 1      | Trial 2 | Trial 3 | Trial 4 | Trial 1        | Trial 2 | Trial 3 |
| 0             | 0            | 0       | 0       | 0       | 0              | 0       | 0       |
| 0.5           | 558          | 491     | 430     | 417     | 1270           | 1290    | 1280    |
| 1             | 527          | 437     | 426     | 430     | 1280           | 1290    | 1275    |
| 1.5           | 470          | 415     | 390     | 380     | 1290           | 1281    | 1286    |
| 2             | 425          | 390     | 367     | 347     | 1290           | 1271    | 1287    |
| 2.5           | 343          | 373     | 352     | 321     | 1279           | 1290    | 1275    |
| 3             | 230          | 350     | 261     | 305     | 1286           | 1285    | 1283    |
| 3.5           | 70           | 340     | 178     | 298     | 1279           | 1291    | 1269    |
| 4             | 51           | 139     | 94      | 258     | 1285           | 1280    | 1263    |
| 4.5           | 44           | 38      | 50      | 60      | 1281           | 1280    | 1271    |
| 5             | 40           | 34      | 37      | 43      | 1282           | 1285    | 1266    |
| 5.5           | 38           | 31      | 33      | 33      | 1280           | 1285    | 1255    |
| 6             | 36           | 29      | 30      | 31      | 1270           | 1278    | 1271    |
| 6.5           | 34           | 29      | 29      | 30      | 1273           | 1282    | 1266    |

**Table S13.** Current and potential data for the 0.99 mm<sup>3</sup> salt bridge.

| Time<br>(min) | Current (µA) |         |         |         | Potential (mV) |         |         |
|---------------|--------------|---------|---------|---------|----------------|---------|---------|
|               | Trial 1      | Trial 2 | Trial 3 | Trial 4 | Trial 1        | Trial 2 | Trial 3 |
| 0             | 0            | 0       | 0       | 0       | 0              | 0       | 0       |
| 0.5           | 706          | 370     | 606     | 767     | 1290           | 1289    | -       |
| 1             | 675          | 531     | 636     | 700     | 1275           | 1274    | 1275    |
| 1.5           | 600          | 525     | 600     | 652     | 1276           | 1271    | 1272    |
| 2             | 488          | 511     | 536     | 599     | 1303           | 1300    | -       |
| 2.5           | 83           | 445     | 490     | 540     | 1300           | 1300    | -       |
| 3             | 48           | 365     | 53      | 494     | 1289           | 1309    | -       |
| 3.5           | 41           | 59      | 36      | 435     | 1285           | 1290    | -       |
| 4             | 39           | 43      | 32      | 405     | 1300           | 1165    | -       |
| 4.5           | 35           | 37      | 30      | 360     | 1280           | 1281    | -       |
| 5             | 32           | 35      | 27      | 280     | 1273           | 1272    | -       |

Relationship Between Length of a Salt Bridge and Resistance

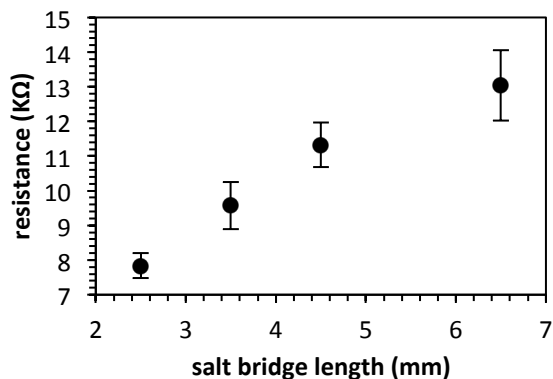

**Figure S7.** Salt bridge length vs. resistance. These tests were accomplished using layer 2 from the devices shown in Figs. S6 and S6. Each point is the average of 7 trials; the error bars represent the standard deviations from these averages.

**Table S14.** Data of salt bridge resistance versus length that corresponds to Fig. S7.

| Length<br>(mm) | Resistance (KΩ) |        |         |         |         |         |         |         |
|----------------|-----------------|--------|---------|---------|---------|---------|---------|---------|
|                | Trial 1         | Trial2 | Trial 3 | Trial 4 | Trial 5 | Trial 6 | Trial 7 | Trial 8 |
| 6.5            | -               | 11.6   | 13.4    | 12.4    | 14.3    | 12.4    | 12.9    | 14.3    |
| 4.5            | -               | 10.7   | 11.3    | 11.7    | 12.5    | 10.8    | 11.5    | 10.8    |
| 3.5            | 8.7             | 10.3   | 10.4    | 9.3     | 10.3    | 9.3     | 8.8     | 9.5     |
| 2.5            | 8.6             | 8.0    | 7.5     | 7.8     | 8.0     | 7.6     | 7.6     | 7.6     |

## Fluidic batteries Design Type 1 corresponding to Fig. 6

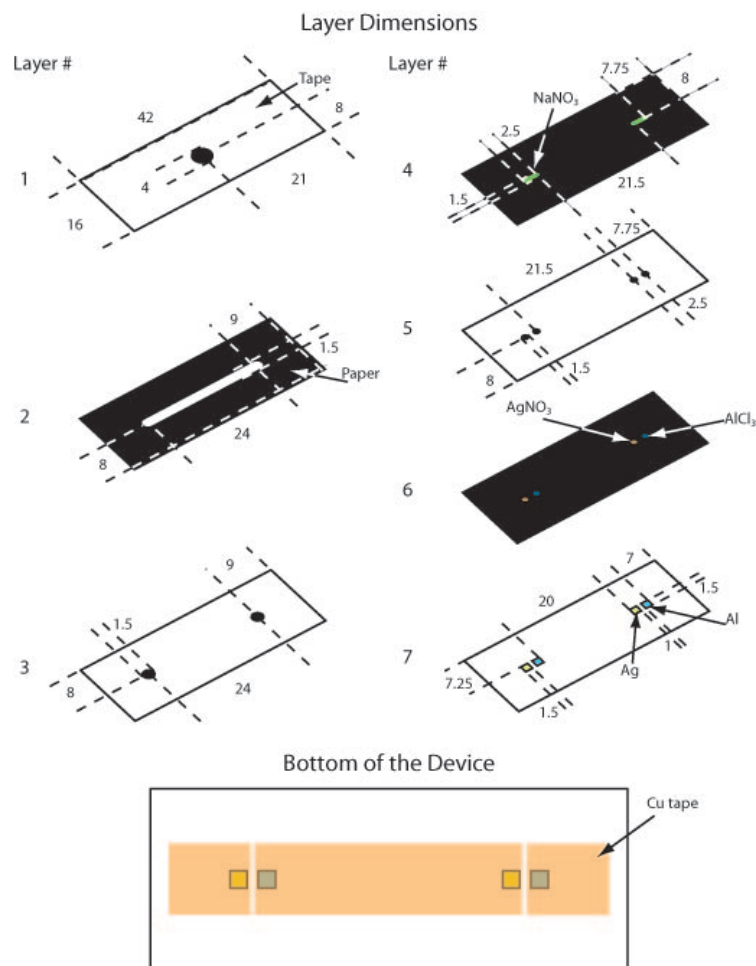

**Figure S8.** Expanded view of a Type 1 device containing 1 cell in parallel and 2 of those in series. All values listed are in mm.

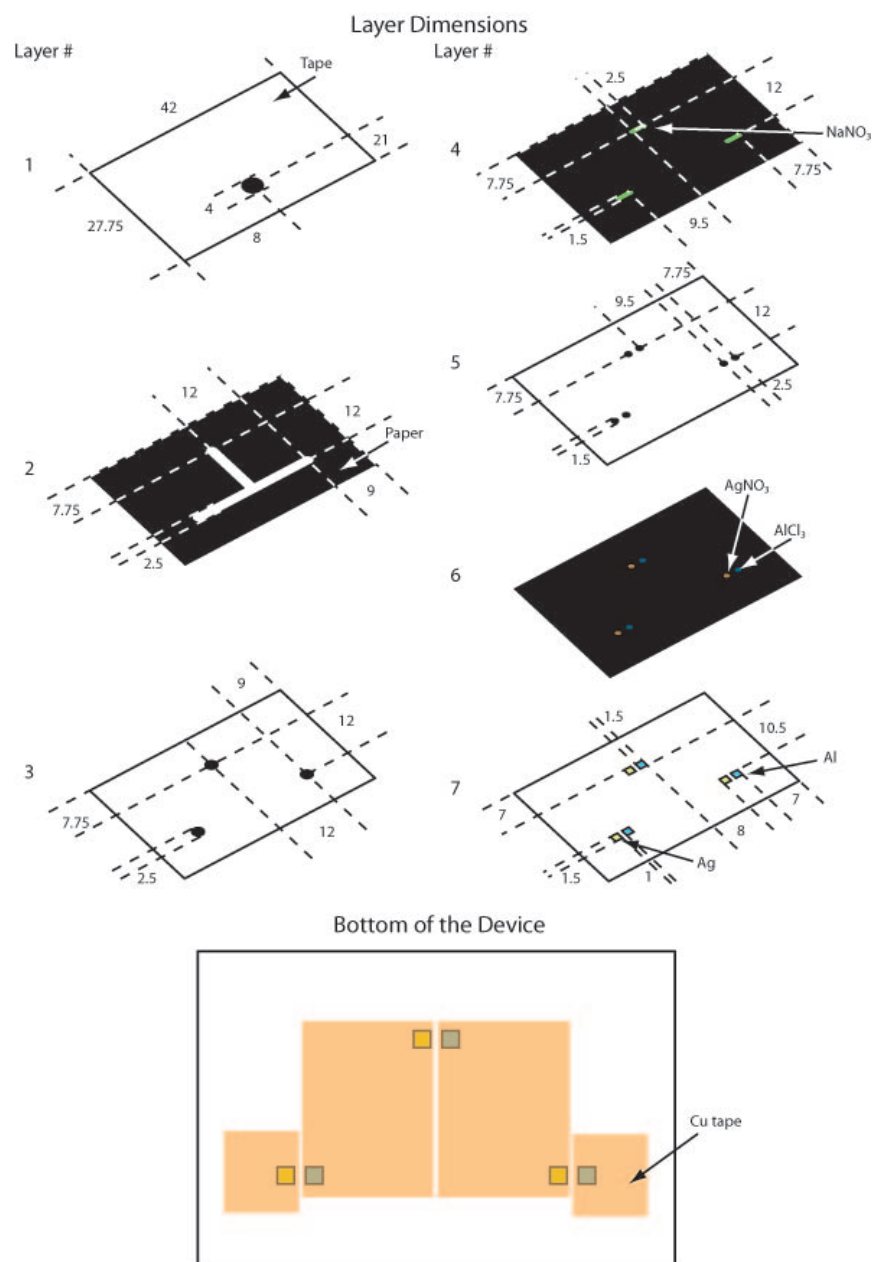

**Figure S9.** Expanded view of a Type 1 device containing 1 cell in parallel and 3 of those in series. All values listed are in mm.

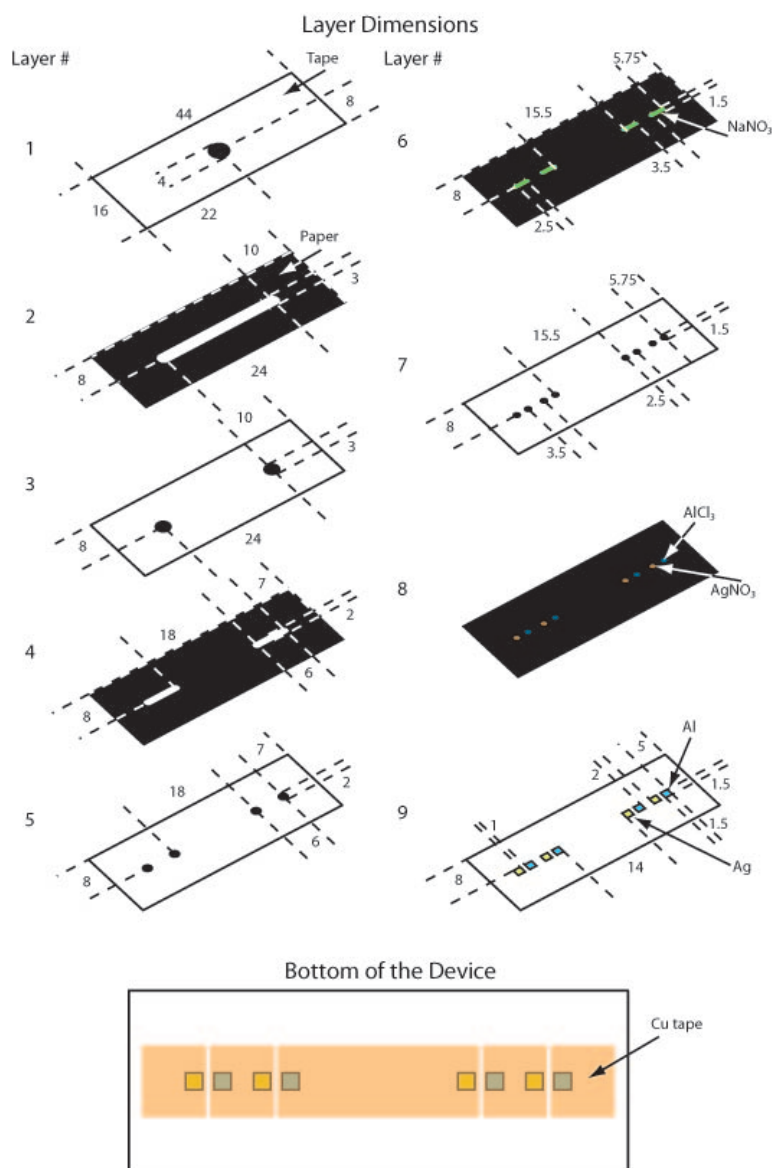

**Figure S10.** Expanded view of a Type 1 device containing 1 cell in parallel and 4 of those in series. All values listed are in mm.

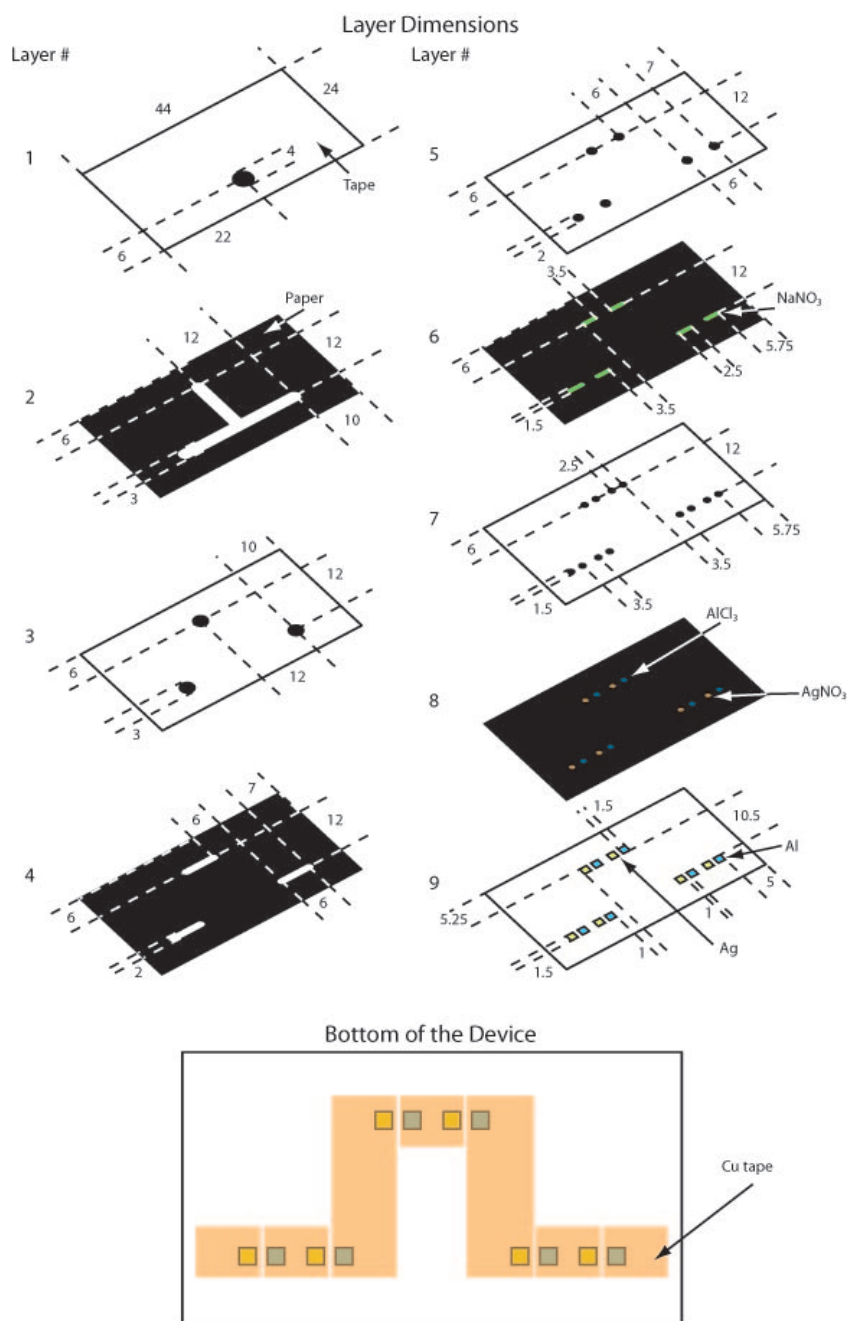

**Figure S11.** Expanded view of a Type 1 device containing 1 cell in parallel and 6 of those in series. All values listed are in mm.

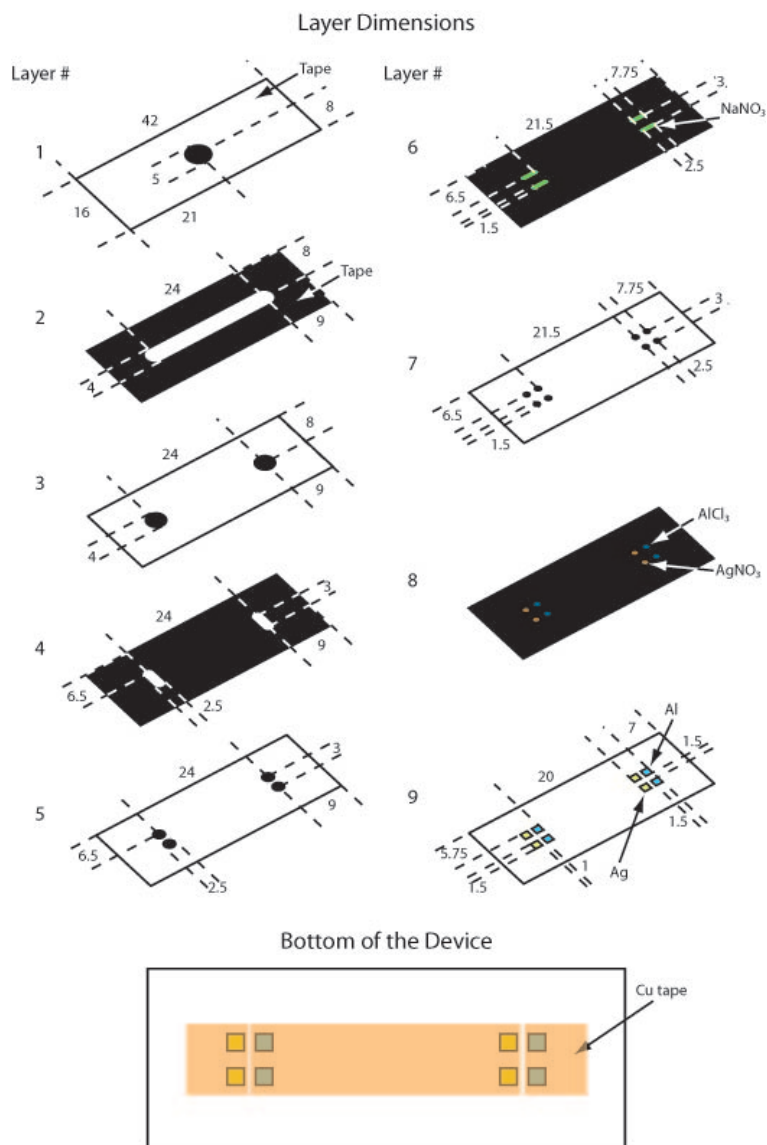

**Figure S12.** Expanded view of a Type 1 device containing 2 cells in parallel and 2 of those in series. All values listed are in mm.

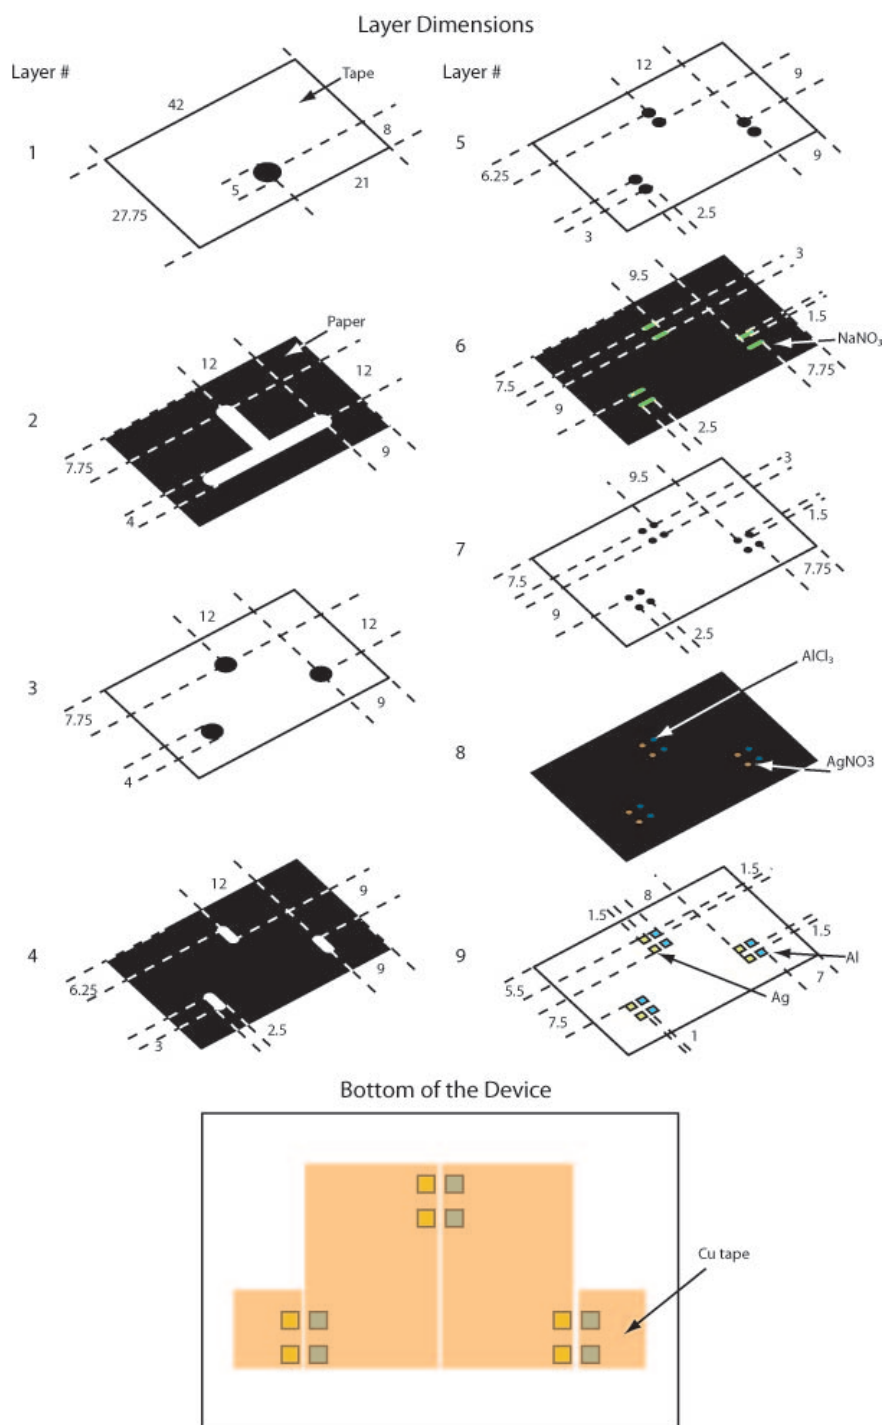

**Figure S13.** Expanded view of a Type 1 device containing 2 cells in parallel and 3 of those in series. All values listed are in mm.

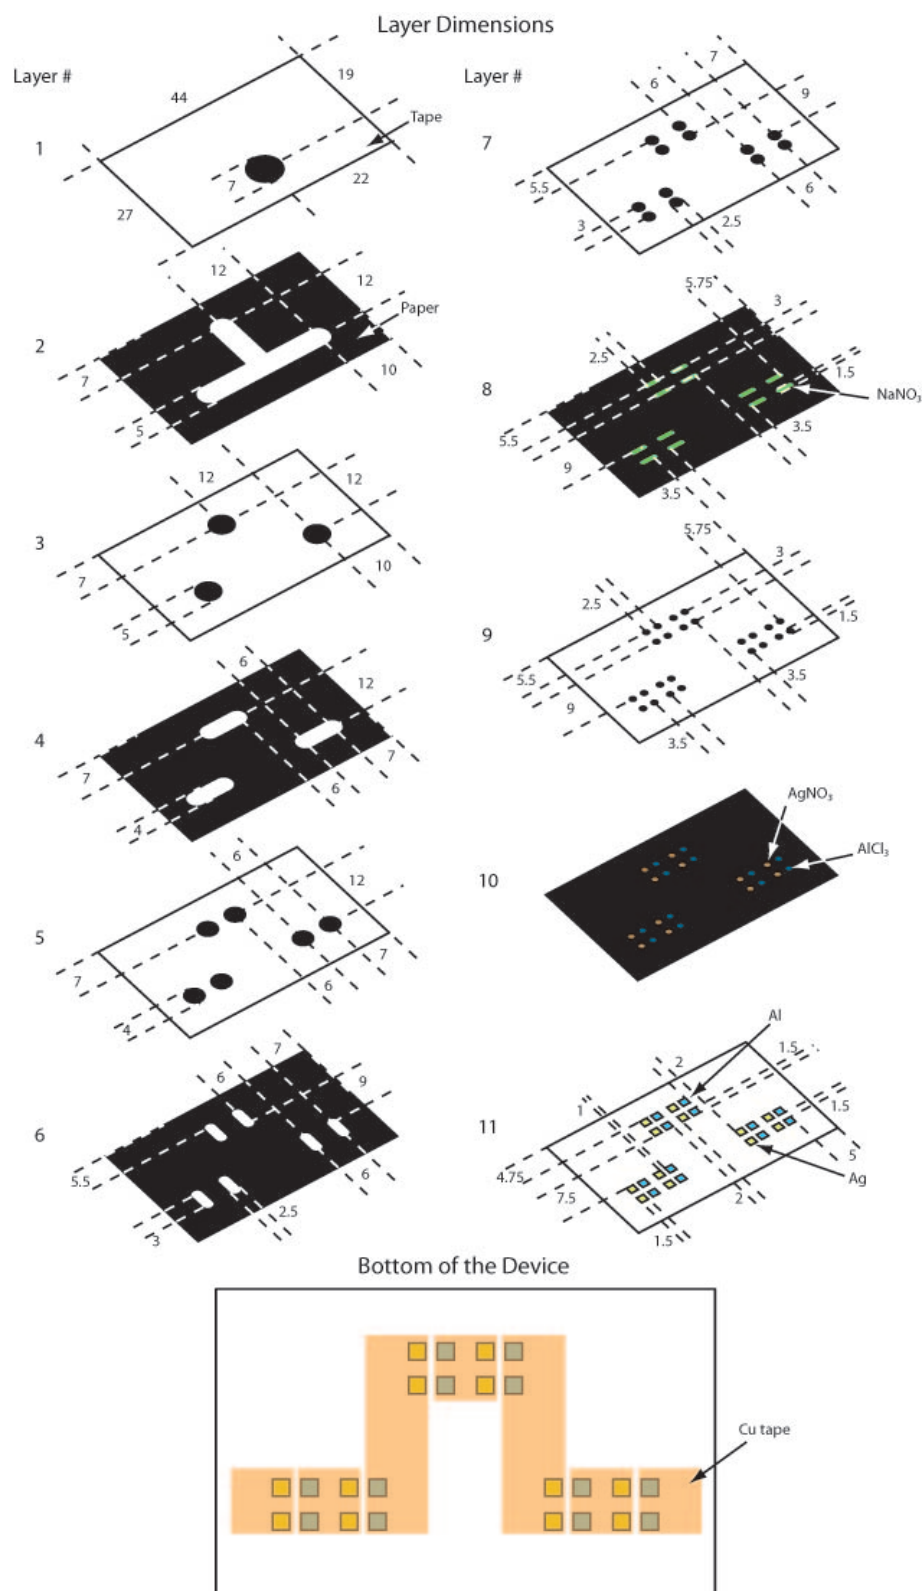

**Figure S14.** Expanded view of a Type 1 device containing 2 cells in parallel and 6 of those in series. All values listed are in mm.

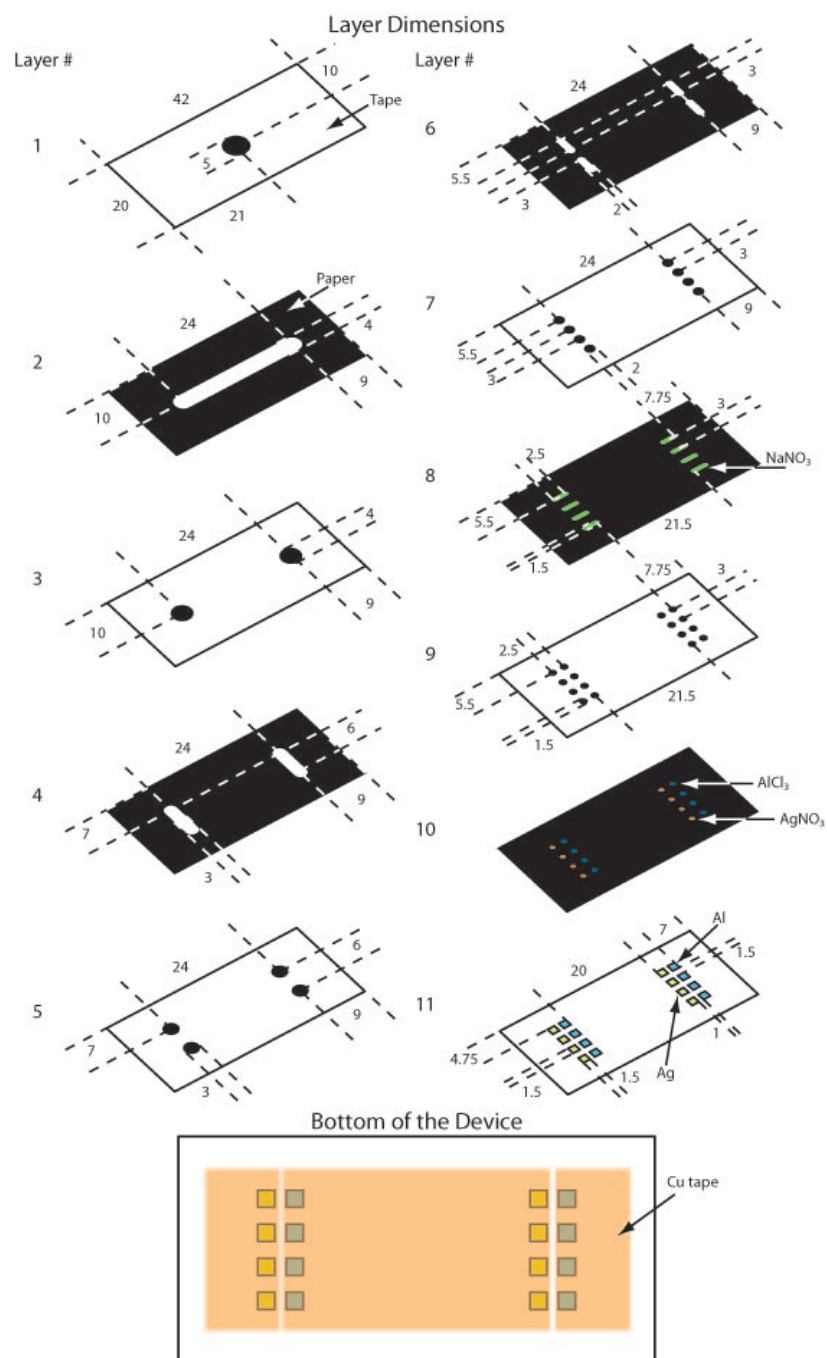

**Figure S15.** Expanded view of a Type 1 device containing 4 cells in parallel and 2 of those in series. All values listed are in mm.

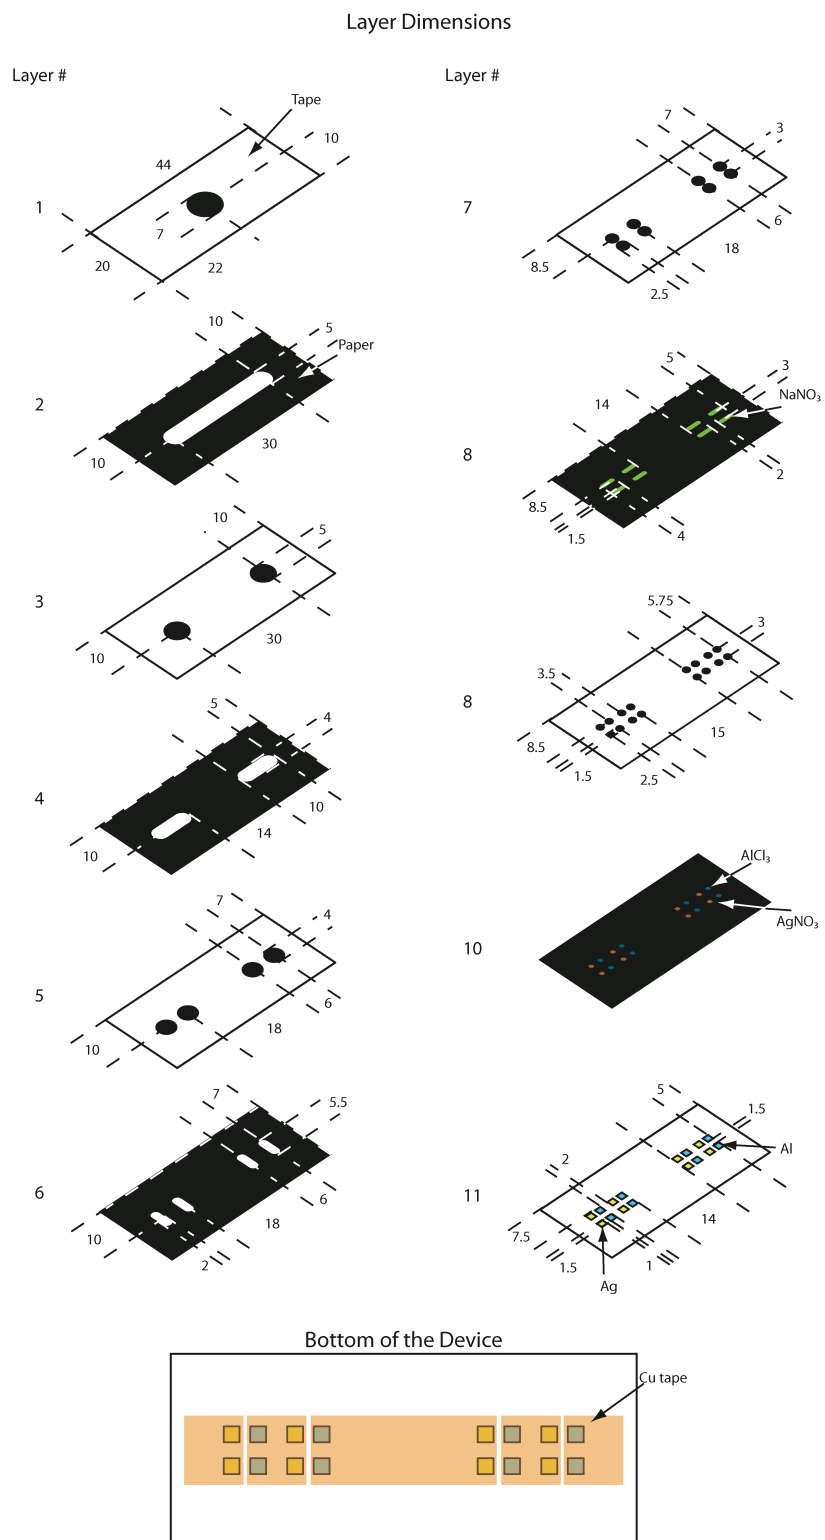

**Figure S16.** Expanded view of a Type 1 device containing 4 cells in series and 2 of those in parallel. All values listed are in mm.

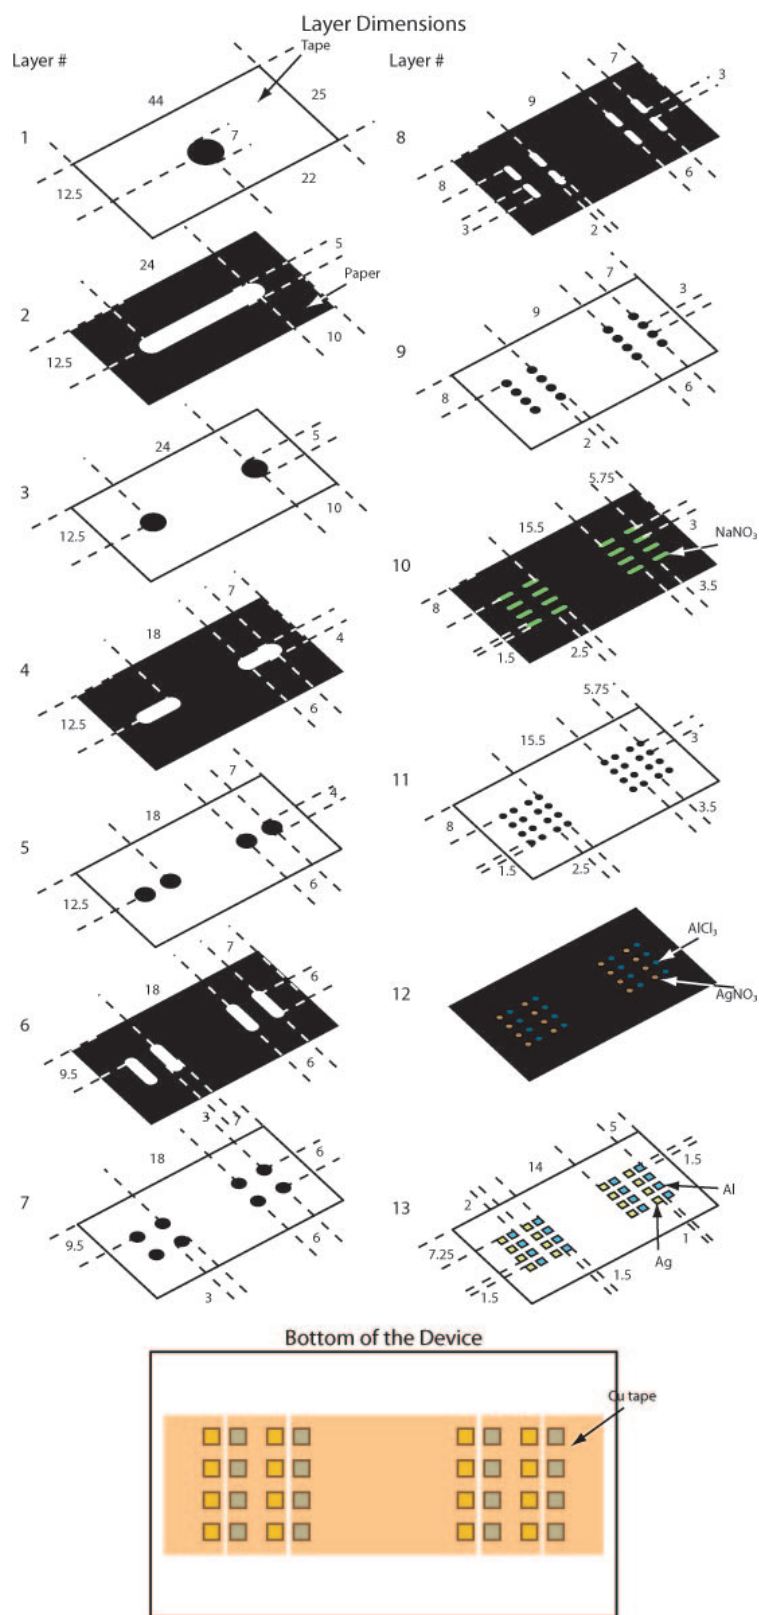

**Figure S17.** Expanded view of a Type 1 device containing 4 cells in parallel and 4 of those in series. All values are listed in mm.

**Table S15.** Results from measurements of a Type 1 device containing 1 cell in parallel and 2 of those in series. This data was collected after using 20  $\mu\text{L}$  deionized water to start the battery in Figure S8.

| Time<br>(min) | Current ( $\mu\text{A}$ ) |         |         |         | Potential (V) |
|---------------|---------------------------|---------|---------|---------|---------------|
|               | Trial 1                   | Trial 2 | Trial 3 | Trial 4 | Trial 1       |
| 0             | 0                         | 0       | 0       | 0       | 0.00          |
| 0.5           | 0                         | 0       | 0       | 0       | 0.00          |
| 1             | 0                         | 0       | 0       | 0       | 0.00          |
| 1.5           | 0                         | 0       | 0       | 0       | 0.00          |
| 2             | 0                         | 20      | 0       | 1       | 0.00          |
| 2.5           | 0                         | 48      | 58      | 109     | 2.27          |
| 3             | 97                        | 86      | 85      | 140     | 2.63          |
| 3.5           | 138                       | 116     | 107     | 167     | 2.70          |
| 4             | 173                       | 151     | 150     | 184     | 2.71          |
| 4.5           | 216                       | 200     | 179     | 192     | 2.74          |
| 5             | 265                       | 225     | 220     | 198     | 2.76          |
| 5.5           | 299                       | 230     | 242     | 217     | 2.76          |
| 6             | 303                       | 242     | 257     | 236     | 2.76          |
| 6.5           | 312                       | 262     | 283     | 241     | 2.75          |
| 7             | 330                       | 290     | 315     | 250     | 2.75          |
| 7.5           | 363                       | 305     | 340     | 248     | 2.76          |
| 8             | 374                       | 315     | 330     | 255     | 2.74          |

**Table S16.** Results from measurements of a Type 1 device containing 1 cell in parallel and 3 of those in series. This data was collected after using 30  $\mu\text{L}$  deionized water to start the battery in Figure S9.

| Time<br>(min) | Current ( $\mu\text{A}$ ) |         |         |         | Potential (V) |
|---------------|---------------------------|---------|---------|---------|---------------|
|               | Trial 1                   | Trial 2 | Trial 3 | Trial 4 | Trial 1       |
| 0             | 0                         | 0       | 0       | 0       | 0.00          |
| 0.5           | 0                         | 0       | 0       | 0       | 0.00          |
| 1             | 0                         | 0       | 0       | 0       | 0.00          |
| 1.5           | 0                         | 0       | 0       | 0       | 0.00          |
| 2             | 0                         | 0       | 0       | 50      | 2.90          |
| 2.5           | 185                       | 4       | 20      | 225     | 3.88          |
| 3             | 271                       | 160     | 165     | 310     | 3.93          |

**Table S16 Continued.** Results from measurements of a Type 1 device containing 1 cell in parallel and 3 of those in series. This data was collected after using 30  $\mu\text{L}$  deionized water to start the battery in Figure S9.

| Time<br>(min) | Current ( $\mu\text{A}$ ) |         |         |         | Potential (V) |
|---------------|---------------------------|---------|---------|---------|---------------|
|               | Trial 1                   | Trial 2 | Trial 3 | Trial 4 | Trial 1       |
| 3.5           | 343                       | 250     | 225     | 355     | 3.94          |
| 4             | 392                       | 290     | 275     | 350     | 3.94          |
| 4.5           | 410                       | 343     | 320     | 345     | 3.92          |
| 5             | 400                       | 395     | 350     | 330     | 3.90          |
| 5.5           | 380                       | 390     | 330     | 315     | -             |
| 6             | 365                       | 375     | 320     | 305     | -             |
| 6.5           | 355                       | 365     | 310     | 295     | -             |
| 7             | 340                       | 355     | 300     | 285     | -             |
| 7.5           | 315                       | 340     | 290     | 280     | -             |
| 8             | 255                       | 305     | 280     | 260     | -             |
| 8.5           | 140                       | 235     | 270     | 210     | -             |
| 9             | 95                        | 210     | 245     | 105     | -             |

**Table S17.** Results from measurements of a Type 1 device containing 1 cell in parallel and 4 of those in series. This data was collected after using 20  $\mu\text{L}$  deionized water to start the battery in Figure S10.

| Time<br>(min) | Current ( $\mu\text{A}$ ) |         |         | Potential (V) |         |         |
|---------------|---------------------------|---------|---------|---------------|---------|---------|
|               | Trial 1                   | Trial 2 | Trial 3 | Trial 1       | Trial 2 | Trial 3 |
| 0             | 0                         | 0       | 0       | 0.00          | 0.00    | 0.00    |
| 0.5           | 0                         | 0       | 0       | 0.00          | 0.00    | 0.00    |
| 1             | 0                         | 0       | 0       | 0.00          | 0.00    | 0.00    |
| 1.5           | 0                         | 0       | 0       | 0.00          | 0.00    | 0.00    |
| 2             | 0                         | 0       | 0       | 0.00          | 0.00    | 0.00    |
| 2.5           | 0                         | 0       | 0       | 0.00          | 0.00    | 0.00    |
| 3             | 0                         | 0       | 0       | 0.00          | 0.00    | 0.00    |
| 3.5           | 0                         | 0       | 0       | 0.00          | 0.00    | 0.00    |
| 4             | 0                         | 0       | 0       | 0.00          | 0.00    | 0.00    |
| 4.5           | 5                         | 0       | 0       | 3.07          | 0.09    | 0.40    |
| 5             | 176                       | 0       | 105     | 5.00          | 0.13    | 3.46    |
| 5.5           | 232                       | 25      | 251     | 5.16          | 0.14    | 4.96    |
| 6             | 265                       | 159     | 302     | 5.22          | 5.15    | 5.14    |
| 6.5           | 285                       | 218     | 317     | 5.19          | 5.18    | 5.18    |
| 7             | 292                       | 254     | 330     | 5.16          | 5.21    | 5.19    |
| 7.5           | 295                       | 280     | 335     | 5.14          | 5.24    | 4.60    |
| 8             | 285                       | 290     | 345     | 5.09          | 5.21    | 4.01    |
| 8.5           | 285                       | 290     | 352     | 5.05          | 5.20    | 4.89    |
| 9             | 277                       | 288     | 347     | 5.03          | 5.18    | 4.70    |

**Table S17 Continued.** Results from measurements of a Type 1 device containing 1 cell in parallel and 4 of those in series. This data was collected after using 20  $\mu\text{L}$  deionized water to start the battery in Figure S10.

| Time<br>(min) | Current ( $\mu\text{A}$ ) |         |         | Potential (V) |         |         |
|---------------|---------------------------|---------|---------|---------------|---------|---------|
|               | Trial 1                   | Trial 2 | Trial 3 | Trial 1       | Trial 2 | Trial 3 |
| 9.5           | 240                       | 285     | 340     | 5.01          | 5.15    | 4.50    |
| 10            | 230                       | 275     | 320     | 4.98          | 5.12    | 4.86    |
| 10.5          | 220                       | 251     | 290     | 4.97          | 5.10    | 4.94    |
| 11            | 190                       | 225     | 195     | 4.92          | 5.06    | 4.95    |
| 11.5          | 147                       | 197     | 161     | 4.89          | 5.04    | 4.51    |
| 12            | 105                       | 158     | 141     | 4.90          | 4.94    | 4.40    |
| 12.5          | 96                        | 133     | 101     | 4.88          | 4.94    | 3.22    |

**Table S18.** Results from measurements of a Type 1 device containing 1 cell in parallel and 6 of those in series. This data was collected after using 30  $\mu\text{L}$  deionized water to start the battery in Figure S11.

| Time<br>(min) | Current ( $\mu\text{A}$ ) |         |         |         | Potential (V) |         |         |
|---------------|---------------------------|---------|---------|---------|---------------|---------|---------|
|               | Trial 1                   | Trial 2 | Trial 3 | Trial 4 | Trial 1       | Trial 2 | Trial 3 |
| 0             | 0                         | 0       | 0       | 0       | 0.00          | 0.00    | 0.00    |
| 0.5           | 0                         | 0       | 0       | 0       | 0.00          | 0.00    | 0.00    |
| 1             | 0                         | 0       | 0       | 0       | 0.00          | 0.00    | 0.00    |
| 1.5           | 0                         | 0       | 0       | 0       | 0.00          | 0.00    | 0.00    |
| 2             | 0                         | 0       | 0       | 0       | 0.00          | 0.00    | 0.00    |
| 2.5           | 0                         | 0       | 0       | 0       | 0.00          | 0.00    | 0.00    |
| 3             | 0                         | 0       | 0       | 0       | 0.00          | 0.00    | 0.00    |
| 3.5           | 0                         | 0       | 0       | 0       | 0.00          | 0.00    | 0.00    |
| 4             | 0                         | 0       | 0       | 0       | 0.00          | 0.15    | 0.01    |
| 4.5           | 142                       | 4       | -       | 22      | 0.16          | 6.00    | 0.04    |
| 5             | 218                       | 200     | 130     | 127     | 2.90          | 7.28    | 6.50    |
| 5.5           | 315                       | 285     | 190     | 175     | 7.40          | 7.43    | 7.66    |
| 6             | 345                       | 330     | 241     | 220     | 7.63          | 7.41    | 7.73    |
| 6.5           | 367                       | 350     | 278     | 260     | 7.65          | 6.70    | 7.68    |
| 7             | 365                       | 357     | 303     | 285     | 7.65          | 7.07    | 7.62    |
| 7.5           | 360                       | 360     | 330     | 303     | 7.64          | 7.32    | 7.61    |
| 8             | 353                       | 360     | 355     | 317     | 7.57          | 7.45    | 7.51    |
| 8.5           | 345                       | 355     | 365     | 330     | 7.53          | 7.50    | 7.46    |
| 9             | 320                       | 335     | 380     | 336     | -             | 7.36    | 7.44    |
| 9.5           | 301                       | 320     | 375     | 333     | 7.12          | 7.37    | 7.42    |
| 10            | 280                       | 275     | 350     | 315     | 7.31          | 7.20    | 7.43    |
| 10.5          | 205                       | 230     | 290     | 295     | 7.41          | 7.05    | 7.38    |
| 11            | 100                       | 160     | 185     | 266     | 7.41          | 6.74    | 7.35    |
| 11.5          | 55                        | 126     | 122     | 235     | 7.37          | 6.94    | 7.32    |

**Table S18 Continued.** Results from measurements of a Type 1 device containing 1 cell in parallel and 6 of those in series. This data was collected after using 30  $\mu\text{L}$  deionized water to start the battery in Figure S11.

| Time<br>(min) | Current ( $\mu\text{A}$ ) |         |         |         | Potential (V) |         |         |
|---------------|---------------------------|---------|---------|---------|---------------|---------|---------|
|               | Trial 1                   | Trial 2 | Trial 3 | Trial 4 | Trial 1       | Trial 2 | Trial 3 |
| 12            | 50                        | 110     | 65      | 152     | 7.11          | 6.87    | 7.26    |

**Table S19.** Results from measurements of a Type 1 device containing 2 cells in parallel and 2 of those in series. This data was collected after using 30  $\mu\text{L}$  deionized water to start the battery in Figure S12.

| Time<br>(min) | Current ( $\mu\text{A}$ ) |         |         |         | Potential (V) |
|---------------|---------------------------|---------|---------|---------|---------------|
|               | Trial 1                   | Trial 2 | Trial 3 | Trial 4 | Trial 1       |
| 0             | 0                         | 0       | 0       | 0       | 0.00          |
| 0.5           | 0                         | 0       | 0       | 0       | 0.00          |
| 1             | 0                         | 0       | 0       | 0       | 0.00          |
| 1.5           | 0                         | 0       | 0       | 0       | 0.00          |
| 2             | 0                         | 0       | 0       | 0       | 0.00          |
| 2.5           | 0                         | 0       | 1       | 0       | 0.00          |
| 3             | 0                         | 204     | 204     | 67      | 1.60          |
| 3.5           | 110                       | 365     | 322     | 345     | 2.73          |
| 4             | 320                       | 480     | 393     | 420     | 2.73          |
| 4.5           | 525                       | 524     | 451     | 515     | 2.73          |
| 5             | 580                       | 550     | 530     | 598     | 2.73          |
| 5.5           | 615                       | 570     | 588     | 625     | 2.73          |
| 6             | 633                       | 560     | 595     | 611     | 2.71          |
| 6.5           | 660                       | 570     | 585     | 575     | 2.69          |
| 7             | 660                       | 545     | 583     | 615     | 2.68          |
| 7.5           | 678                       | 540     | 580     | 605     | -             |
| 8             | 660                       | 545     | 585     | 607     | -             |
| 8.5           | 635                       | 530     | 585     | 607     | -             |
| 9             | 610                       | 505     | 580     | 600     | -             |
| 9.5           | 490                       | 495     | 560     | 580     | -             |
| 10            | 460                       | 465     | 480     | 320     | -             |
| 10.5          | 350                       | 335     | 280     | 115     | -             |
| 11            | 158                       | 250     | 125     | 101     | -             |
| 11.5          | 145                       | 125     | 96      | 97      | -             |

**Table S20.** Results from measurements of a Type 1 device containing 2 cells in parallel and 3 of those in series. This data was collected after using 30  $\mu\text{L}$  deionized water to start the battery in Figure S13.

| Time<br>(min) | Current ( $\mu\text{A}$ ) |         |         |         | Potential (V) |
|---------------|---------------------------|---------|---------|---------|---------------|
|               | Trial 1                   | Trial 2 | Trial 3 | Trial 4 | Trial 1       |
| 0             | 0                         | 0       | 0       | 0       | 0.00          |
| 0.5           | 0                         | 0       | 0       | 0       | 0.00          |
| 1             | 0                         | 0       | 0       | 0       | 0.00          |
| 1.5           | 0                         | 0       | 0       | 0       | 0.00          |
| 2             | 0                         | 0       | 0       | 0       | 0.00          |
| 2.5           | 80                        | 220     | 35      | 210     | 3.21          |
| 3             | 405                       | 610     | 460     | 435     | 3.96          |
| 3.5           | 625                       | 815     | 700     | 583     | 3.96          |
| 4             | 740                       | 855     | 790     | 630     | 3.96          |
| 4.5           | 775                       | 827     | 775     | 643     | 3.92          |
| 5             | 785                       | 705     | 815     | 609     | 3.89          |
| 5.5           | 710                       | 723     | 765     | 605     | -             |
| 6             | 685                       | 655     | 700     | 595     | -             |
| 6.5           | 625                       | 605     | 690     | 540     | -             |
| 7             | 620                       | 550     | 650     | 522     | -             |
| 7.5           | 575                       | 515     | 625     | 502     | -             |
| 8             | 540                       | 475     | 540     | 480     | -             |
| 8.5           | 460                       | 400     | 400     | 445     | -             |
| 9             | 315                       | 280     | 245     | 390     | -             |
| 9.5           | 215                       | 165     | 155     | 260     | -             |
| 10            | 187                       | 120     | 91      | 250     | -             |

**Table S21.** Results from measurements of a Type 1 device containing 2 cells in parallel and 6 of those in series. This data was collected after using 100  $\mu\text{L}$  deionized water to start the battery in Figure S14.

| Time<br>(min) | Current ( $\mu\text{A}$ ) |         |         |         |
|---------------|---------------------------|---------|---------|---------|
|               | Trial 1                   | Trial 2 | Trial 3 | Trial 4 |
| 0             | 0                         | 0       | 0       | 0       |
| 0.5           | 0                         | 0       | 0       | 0       |
| 1             | 0                         | 0       | 0       | 0       |
| 1.5           | 0                         | 0       | 0       | 0       |
| 2             | 0                         | 0       | 0       | 0       |
| 2.5           | 0                         | 0       | 0       | 0       |
| 3             | 0                         | 0       | 0       | 0       |
| 3.5           | 0                         | 0       | 0       | 0       |
| 4             | 2                         | 109     | 0       | 0       |
| 4.5           | 7                         | 280     | 95      | 4       |

**Table S21 Continued.** Results from measurements of a Type 1 device containing 2 cells in parallel and 6 of those in series. This data was collected after using 100  $\mu\text{L}$  deionized water to start the battery in Figure S14.

| Time<br>(min) | Current ( $\mu\text{A}$ ) |         |         |         |
|---------------|---------------------------|---------|---------|---------|
|               | Trial 1                   | Trial 2 | Trial 3 | Trial 4 |
| 5             | 9                         | 330     | 220     | 115     |
| 5.5           | 10                        | 370     | 290     | 205     |
| 6             | 13                        | 440     | 340     | 266     |
| 6.5           | 14                        | 480     | 372     | 340     |
| 7             | 15                        | 505     | 395     | 390     |
| 7.5           | 22                        | 515     | 435     | 490     |
| 8             | 720                       | 525     | 450     | 610     |
| 8.5           | 620                       | 545     | 453     | 635     |
| 9             | 625                       | 560     | 467     | 662     |
| 9.5           | 645                       | 575     | 458     | 643     |
| 10            | 650                       | 565     | 465     | 615     |
| 10.5          | 610                       | 515     | 460     | 545     |
| 11            | 610                       | 450     | 475     | 475     |
| 11.5          | 588                       | 390     | 475     | 375     |
| 12            | 620                       | 310     | 473     | 260     |
| 12.5          | 600                       | 205     | 450     | 240     |
| 13            | 445                       | 110     | 391     | 227     |
| 13.5          | 335                       | 98      | 308     | 187     |
| 14            | 170                       | 96      | 275     | 175     |
| 14.5          | 30                        | 93      | 205     | 128     |
| 15            | 30                        | 92      | 140     | 115     |

**Table S22.** Results from measurements of a Type 1 device containing 4 cells in parallel and 2 of those in series. This data was collected after using 40  $\mu\text{L}$  deionized water to start the battery in Figure S15.

| Time<br>(min) | Current ( $\mu\text{A}$ ) |         |         |         | Potential (V) |
|---------------|---------------------------|---------|---------|---------|---------------|
|               | Trial 1                   | Trial 2 | Trial 3 | Trial 4 | Trial 1       |
| 0             | 0                         | 0       | 0       | 0       | 0.00          |
| 0.5           | 0                         | 0       | 0       | 0       | 0.00          |
| 1             | 0                         | 0       | 0       | 0       | 0.00          |
| 1.5           | 0                         | 0       | 0       | 0       | 0.00          |
| 2             | 0                         | 0       | 0       | 0       | 0.00          |
| 2.5           | 0                         | 0       | 0       | 0       | 0.00          |
| 3             | 0                         | 0       | 0       | 0       | 0.00          |
| 3.5           | 0                         | 0       | 0       | 0       | 0.50          |
| 4             | 2                         | 3       | 0       | 1       | 1.92          |
| 4.5           | 160                       | 325     | 0       | 175     | 2.59          |

**Table S22 Continued.** Results from measurements of a Type 1 device containing 4 cells in parallel and 2 of those in series. This data was collected after using 40  $\mu\text{L}$  deionized water to start the battery in Figure S15.

| Time<br>(min) | Current ( $\mu\text{A}$ ) |         |         |         | Potential (V) |
|---------------|---------------------------|---------|---------|---------|---------------|
|               | Trial 1                   | Trial 2 | Trial 3 | Trial 4 | Trial 1       |
| 5             | 700                       | 645     | 75      | 635     | 2.69          |
| 5.5           | 995                       | 785     | 318     | 1027    | 2.71          |
| 6             | 1220                      | 866     | 645     | 1250    | 2.69          |
| 6.5           | 1320                      | 956     | 825     | 1416    | 2.67          |
| 7             | 1390                      | 1015    | 975     | 1500    | 2.66          |
| 7.5           | 1405                      | 1050    | 1040    | 1542    | 2.64          |
| 8             | 1400                      | 1075    | 1125    | 1530    | 2.62          |
| 8.5           | 1375                      | 1080    | 1220    | 1495    | 2.59          |
| 9             | 1360                      | 1068    | 1230    | 1440    | 2.58          |
| 9.5           | 1335                      | 1060    | 1195    | 1390    | 2.59          |
| 10            | 1275                      | 1025    | 1180    | 1280    | 2.58          |
| 10.5          | 1160                      | 1000    | 1165    | 915     | -             |
| 11            | 820                       | 970     | 1155    | 790     | -             |
| 11.5          | 615                       | 850     | 1130    | 590     | -             |
| 12            | 405                       | 785     | 1100    | 310     | -             |
| 12.5          | 245                       | 550     | 1015    | 280     | -             |
| 13            | 220                       | 288     | 810     | 267     | -             |
| 13.5          | 218                       | 188     | 520     | 260     | -             |
| 14            | 215                       | 183     | 235     | 250     | -             |
| 14.5          | 210                       | 180     | 195     | 245     | -             |
| 15            | 208                       | 175     | 175     | 240     | -             |

**Table S23.** Results from measurements of a Type 1 device containing 4 cells in series and 2 of those in parallel. This data was collected after using 40  $\mu\text{L}$  deionized water to start the battery in Figure S16.

| Time<br>(min) | Current ( $\mu\text{A}$ ) |         |         |         | Potential (V) |         |         |
|---------------|---------------------------|---------|---------|---------|---------------|---------|---------|
|               | Trial 1                   | Trial 2 | Trial 3 | Trial 4 | Trial 1       | Trial 2 | Trial 3 |
| 0             | 0                         | 0       | 0       | 0       | 0.00          | 0.00    | 0.00    |
| 0.5           | 0                         | 0       | 0       | 0       | 0.00          | 0.00    | 0.00    |
| 1             | 0                         | 0       | 0       | 0       | 0.00          | 0.00    | 0.00    |
| 1.5           | 0                         | 0       | 0       | 0       | 0.00          | 0.00    | 0.00    |
| 2             | 0                         | 0       | 0       | 0       | 0.00          | 0.00    | 0.00    |
| 2.5           | 0                         | 0       | 0       | 0       | 0.00          | 0.00    | 0.00    |
| 3             | 0                         | 0       | 0       | 0       | 0.00          | 0.00    | 0.00    |
| 3.5           | 0                         | 0       | 0       | 0       | 0.00          | 0.00    | 0.00    |
| 4             | 2                         | 0       | 0       | 0       | 0.00          | 0.01    | 0.00    |
| 4.5           | 161                       | 50      | 7       | 188     | 2.59          | 4.00    | 0.00    |

**Table S23 Continued.** Results from measurements of a Type 1 device containing 4 cells in parallel and 2 of those in series. This data was collected after using 40  $\mu\text{L}$  deionized water to start the battery in Figure S16.

| Time<br>(min) | Current ( $\mu\text{A}$ ) |         |         |         | Potential (V) |         |         |
|---------------|---------------------------|---------|---------|---------|---------------|---------|---------|
|               | Trial 1                   | Trial 2 | Trial 3 | Trial 4 | Trial 1       | Trial 2 | Trial 3 |
| 5             | 557                       | 415     | 312     | 458     | 3.57          | 5.16    | 0.00    |
| 5.5           | 745                       | 587     | 600     | 638     | 5.28          | 5.29    | 0.00    |
| 6             | 820                       | 702     | 700     | 740     | 5.33          | 5.29    | 4.36    |
| 6.5           | 837                       | 725     | 765     | 800     | 5.31          | 5.26    | 5.18    |
| 7             | 830                       | 745     | 775     | 810     | 5.28          | 5.22    | 5.18    |
| 7.5           | 806                       | 700     | 750     | 796     | 5.26          | 5.23    | 5.14    |
| 8             | 725                       | 705     | 770     | 730     | 5.22          | -       | 5.12    |
| 8.5           | 645                       | 680     | 740     | 600     | 5.18          | -       | 5.11    |
| 9             | 535                       | 640     | 680     | 480     | 5.15          | 5.15    | 5.09    |
| 9.5           | 340                       | 615     | 567     | 457     | 5.13          | 5.14    | 5.06    |
| 10            | 300                       | 592     | 373     | 380     | 5.11          | 5.12    | 5.05    |
| 10.5          | 275                       | 480     | 257     | 275     | 5.08          | 5.09    | 5.03    |
| 11            | 175                       | 385     | 185     | 185     | 5.05          | 5.05    | 5.02    |
| 11.5          | 152                       | 150     | 163     | 158     | 5.01          | 5.03    | 5.00    |
| 12            | 132                       | 124     | 122     | 150     | 5.00          | 5.01    | 4.93    |
| 12.5          | 120                       | 104     | 104     | 130     | 4.99          | 4.97    | 4.83    |
| 13            | 121                       | 121     | 102     | 120     | 4.95          | 4.94    | 4.88    |
| 13.5          | 130                       | 118     | 100     | 115     | 4.93          | 4.93    | 4.79    |
| 14            | 129                       | 116     | 98      | 112     | 4.90          | 4.89    | 4.78    |
| 14.5          | 128                       | 114     | 97      | 109     | 4.85          | 4.86    | 4.72    |
| 15            | 120                       | 111     | 90      | 106     | 4.81          | 4.85    | 4.72    |

**Table S24.** Results from measurements of a Type 1 device containing 4 cells in parallel and 4 of those in series. This data was collected after using 80  $\mu\text{L}$  deionized water to start the battery in Figure S17.

| Time<br>(min) | Current ( $\mu\text{A}$ ) |         |         |         | Potential (V) |
|---------------|---------------------------|---------|---------|---------|---------------|
|               | Trial 1                   | Trial 2 | Trial 3 | Trial 4 | Trial 1       |
| 0             | 0                         | 0       | 0       | 0       | 0.00          |
| 0.5           | 0                         | 0       | 0       | 0       | 0.00          |
| 1             | 0                         | 0       | 0       | 0       | 0.00          |
| 1.5           | 0                         | 0       | 0       | 0       | 0.00          |
| 2             | 0                         | 0       | 0       | 0       | 0.00          |
| 2.5           | 0                         | 0       | 0       | 0       | 0.00          |
| 3             | 0                         | 0       | 0       | 0       | 0.00          |
| 3.5           | 0                         | 0       | 0       | 0       | 0.00          |
| 4             | 0                         | 0       | 0       | 0       | 0.00          |
| 4.5           | 0                         | 0       | 0       | 0       | 0.06          |

**Table S24 Continued.** Results from measurements of a Type 1 device containing 4 cells in parallel and 4 of those in series. This data was collected after using 80  $\mu\text{L}$  deionized water to start the battery in Figure S17.

| Time<br>(min) | Current ( $\mu\text{A}$ ) |         |         |         | Potential (V) |
|---------------|---------------------------|---------|---------|---------|---------------|
|               | Trial 1                   | Trial 2 | Trial 3 | Trial 4 | Trial 1       |
| 5             | 0                         | 0       | 0       | 0       | 0.06          |
| 5.5           | 0                         | 2       | 25      | 175     | 0.10          |
| 6             | 0                         | 2       | 167     | 395     | 0.12          |
| 6.5           | 0                         | 230     | 445     | 1120    | 0.60          |
| 7             | 1                         | 800     | 800     | 1660    | 2.34          |
| 7.5           | 1                         | 1240    | 1080    | 1865    | 5.18          |
| 8             | 2                         | 1465    | 1350    | 1935    | 5.33          |
| 8.5           | 142                       | 1540    | 1465    | 1960    | 5.33          |
| 9             | 500                       | 1680    | 1615    | 1840    | 5.31          |
| 9.5           | 850                       | 1765    | 1690    | 1660    | 5.30          |
| 10            | 1095                      | 1807    | 1675    | 1390    | 5.30          |
| 10.5          | 1300                      | 1710    | 1620    | 1070    | 5.28          |
| 11            | 1470                      | 1465    | 1450    | 770     | 5.28          |
| 11.5          | 1595                      | 1120    | 1225    | 565     | 5.26          |
| 12            | 1490                      | 770     | 915     | 455     | 5.24          |
| 12.5          | 1490                      | 620     | 625     | 415     | 5.22          |
| 13            | 1450                      | 560     | 430     | 405     | 5.21          |
| 13.5          | 1340                      | 450     | 360     | 395     | 5.20          |
| 14            | 1115                      | 345     | 317     | 365     | 5.17          |
| 14.5          | 920                       | 280     | 305     | 335     | 5.16          |
| 15            | 780                       | 275     | 295     | 330     | 5.13          |
| 15.5          | 620                       | -       | -       | -       | -             |
| 16            | 480                       | -       | -       | -       | -             |
| 16.5          | 355                       | -       | -       | -       | -             |
| 17            | 218                       | -       | -       | -       | -             |

### Predicting the Maximum Current

For all of the following calculations,  $A$  is the maximum current in  $\mu\text{A}$ ,  $P$  is the number of cells in parallel,  $S$  is the number of cells in series,  $m$  is the slope of the linear regression, and  $b$  is the y-intercept of the linear regression.

**Design Type 1.** The maximum measured current values for Design Type 1 devices containing 1 set of cells in parallel were plotted against the number of cells in series used to obtain the measured current. The linear regression of the maximum current versus the number of cells in series gives the equation  $A = m(S) + b$ . The slope and y-intercept from the linear regression

were recorded. This process was repeated for Design Type 1 devices containing 2 and 4 sets of cells in parallel; the values from the linear regression analyses are recorded in Table S25.

**Table S25.** Maximum measured current for Design Type 1 devices plotted against the number cells in series for 1, 2, and 4 sets of cells in parallel. The slope and y-intercept are determined from the linear regression of the maximum current plotted against the number of cells in series.

| Number of Cells in Parallel | Number of Cells in Series | Max Current ( $\mu\text{A}$ ) | Slope  | Y-intercept |
|-----------------------------|---------------------------|-------------------------------|--------|-------------|
| 1                           | 2                         | 345                           | 0.40   | 347.32      |
|                             | 3                         | 378                           |        |             |
|                             | 4                         | 312                           |        |             |
|                             | 6                         | 361                           |        |             |
| 2                           | 2                         | 617                           | -10.82 | 738.39      |
|                             | 3                         | 775                           |        |             |
|                             | 4                         | 792                           |        |             |
|                             | 6                         | 608                           |        |             |
| 4                           | 2                         | 1314                          | 224.38 | 865.5       |
|                             | 4                         | 1763                          |        |             |

The calculated slopes for each set of cells in series (Table S25) are then plotted against the number of cells in parallel. Likewise, the calculated y-intercepts in Table S25 are plotted against the number of cells in parallel. The linear regression for the plotted slopes versus number of cells in parallel give the equation  $A = m_1(P \times S) + b_1(S)$ , and the linear regression for the plotted intercepts versus the number of cells in parallel gives the equation  $A = m_2(P) + b_2$ . The two calculated equations are then combined to provide the final equation  $A_1 = 80.8(S \times P) + 157.1(P) - 117.2(S) + 283.8$ , which is the predicted maximum current for Design Type 1.

### Predicting the Current Decay Rates

For all of the following calculations,  $D$  is the decay rate in  $\mu\text{A}/\text{min}$ ,  $P$  is the number of cells in parallel,  $S$  is the number of cells in series,  $m$  is the slope of the linear regression, and  $b$  is the y-intercept of the linear regression. Decay rates for each device tested are determined by measuring the slope of the linear region of decay directly following the maximum current measured from a plot of current versus time.

**Design Type 1.** The measured decay rate for Design Type 1 devices containing 3 sets of cells in series were plotted against the number of cells in parallel. The linear regression of the decay rates versus the number of cells in parallel gives the equation  $D = m(P) + b$ . The linear regression for this plot was then determined and the slope and y-intercept were recorded. This process was repeated for Design Type 1 devices containing 4, and 5 sets of cells in series; the values from the linear regression analyses are recorded in Table S26.

**Table S26.** Measured decay rate for Design Type 1 devices plotted against the number cells in parallel for 3, 4, and 5 sets of cells in series. The slope and y-intercept are determined from the linear regression of the maximum current plotted against the number of cells in parallel.

| Number of Cells in Series | Number of Cells in Parallel | Decay Rate ( $\mu\text{A}/\text{min}$ ) | Slope  | Y-Intercept |
|---------------------------|-----------------------------|-----------------------------------------|--------|-------------|
| 3                         | 1                           | -96.1                                   | -45.63 | -31.35      |
|                           | 2                           | -93.97                                  |        |             |
|                           | 4                           | -223.4                                  |        |             |
| 4                         | 1                           | -54.4                                   | -60.94 | 6.51        |
|                           | 2                           | -115.4                                  |        |             |
| 5                         | 1                           | -64.6                                   | -85.07 | 24.79       |
|                           | 2                           | -138.8                                  |        |             |
|                           | 3                           | -317.6                                  |        |             |

The calculated slopes (Table S26) for each set of cells in parallel are then plotted against the number of cells in series, and, in a separate graph, the calculated y-intercepts (Table S26) are plotted against the number of cells in series. The linear regression for the plotted slopes versus number of cells in series give the equation  $D = m_1(P \times S) + b_1(P)$ , and the linear regression for the plotted intercepts versus the number of cells in series gives the equation  $D = m_2(S) + b_2$ . The two calculated equations are then combined to provide the final equation  $D = -19.7 (S \times P) - 4.7(P) + 28.1(S) - 84.2$ , which is the predicted decay rate for Design Type 1.

## Fluidic battery Design Type 2 corresponding to Fig. 8

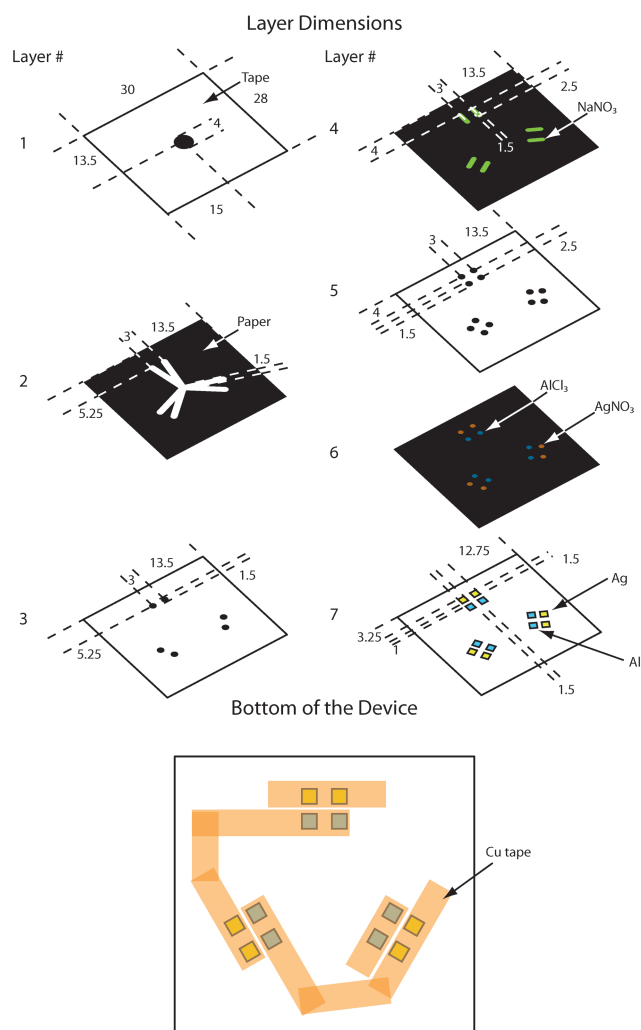

**Figure S18.** Expanded view of a Type 2 device containing 2 cells in parallel and 3 of those in series. All values are listed in mm. The three sets of features are identical, and are placed at a 120° angle.

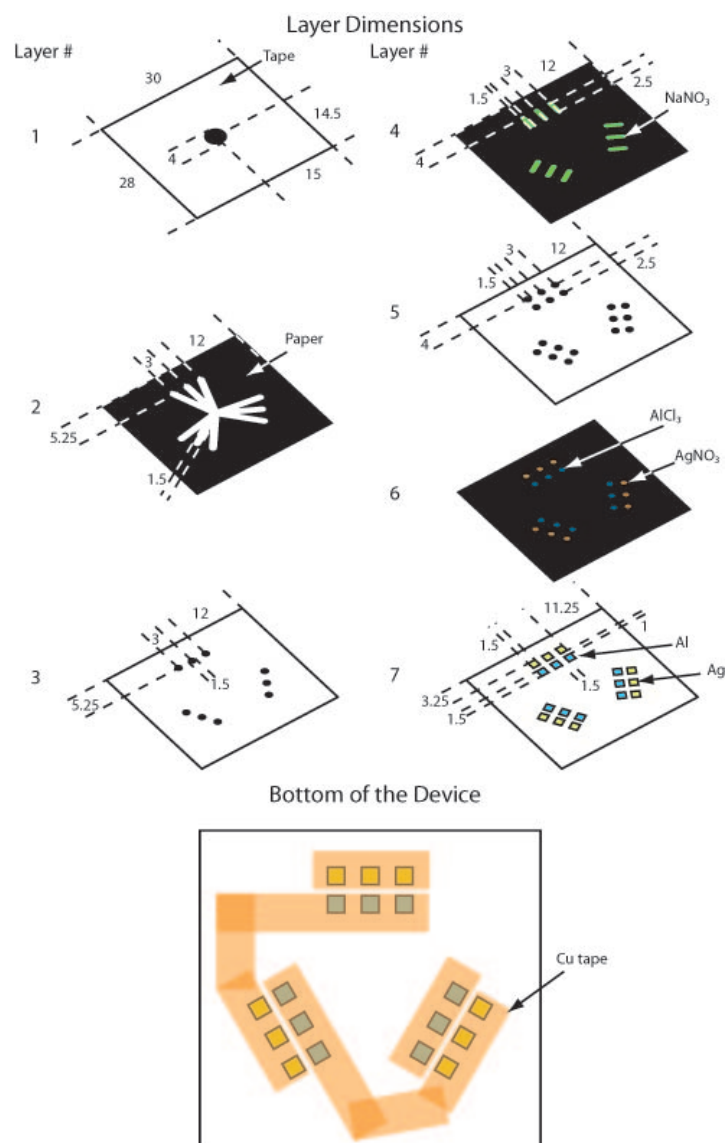

**Figure S19.** Expanded view of a Type 2 device containing 3 cells in parallel and 3 of those in series. All values are listed in mm. The three sets of features are identical, and at a 120° angle.

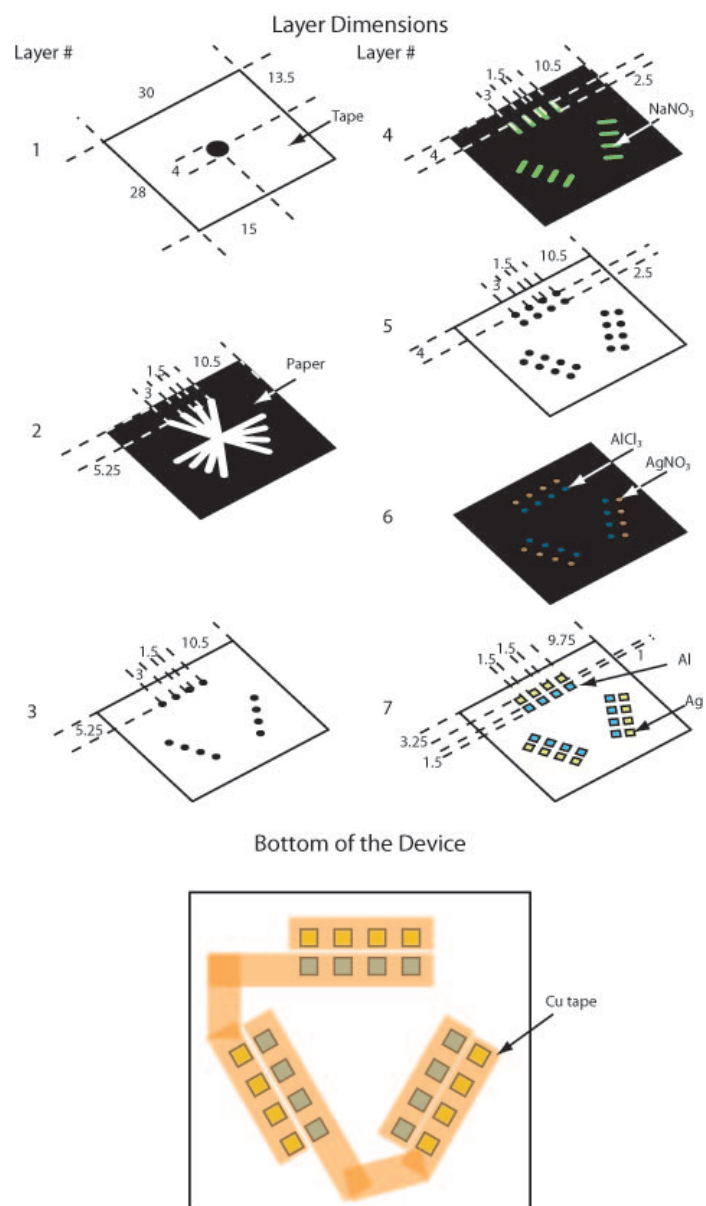

**Figure S20.** Expanded view of a Type 2 device containing 4 cells in parallel and 3 of those in series. All values are listed in mm. The three sets of features are identical, and at a 120° angle.

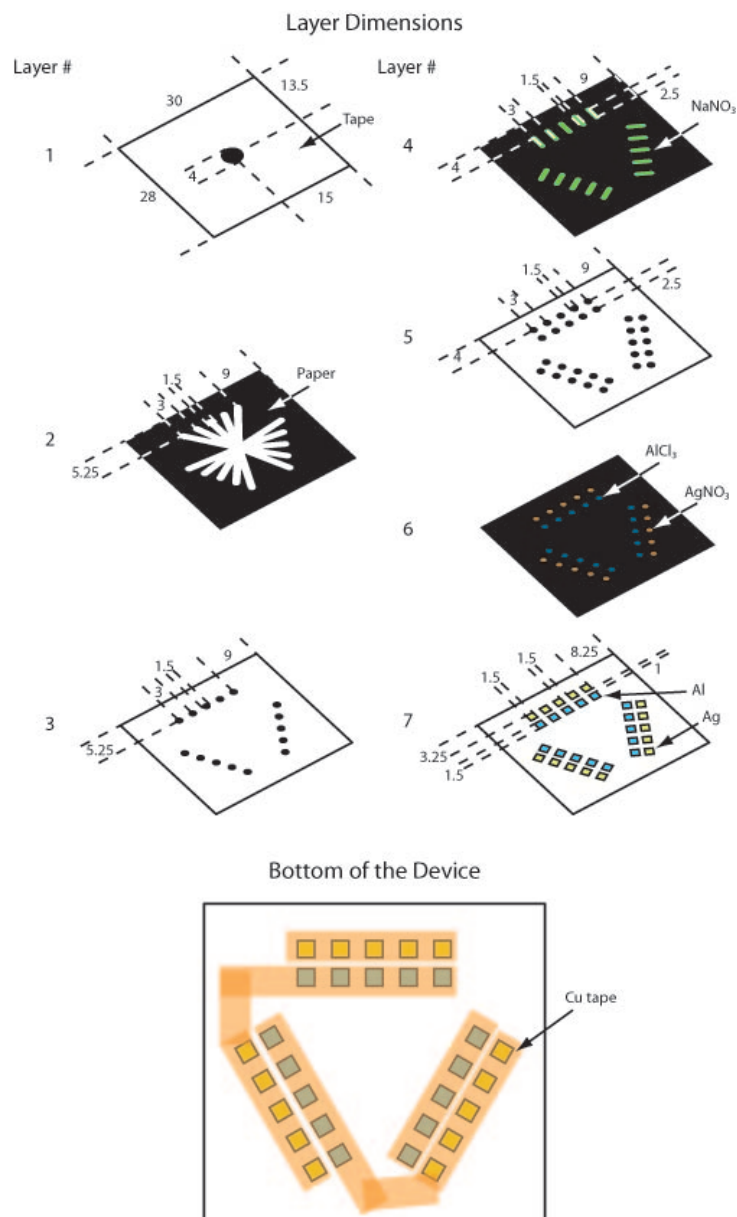

**Figure S21.** Expanded view of a Type 2 device containing 5 cells in parallel and 3 of those in series. All values are listed in mm. The three sets of features are identical, and at a 120° angle.

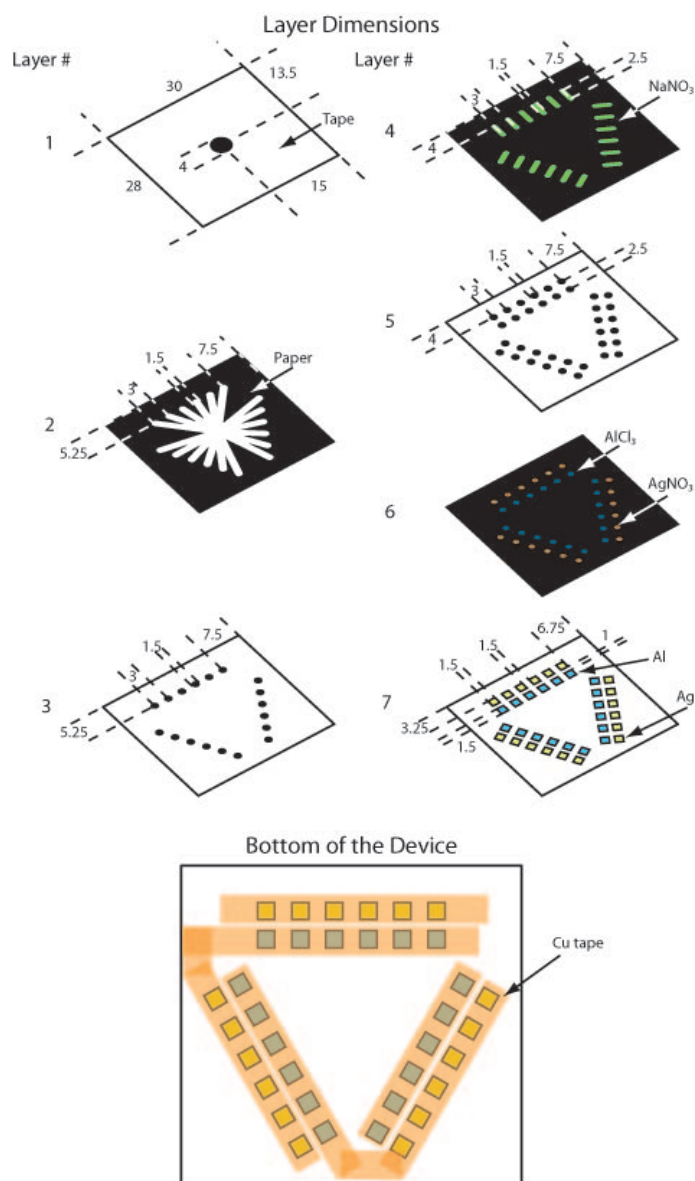

**Figure S22.** Expanded view of a Type 2 device containing 6 cells in parallel and 3 of those in series. All values are listed in mm. The three sets of features are identical, and at a  $120^\circ$  angle.

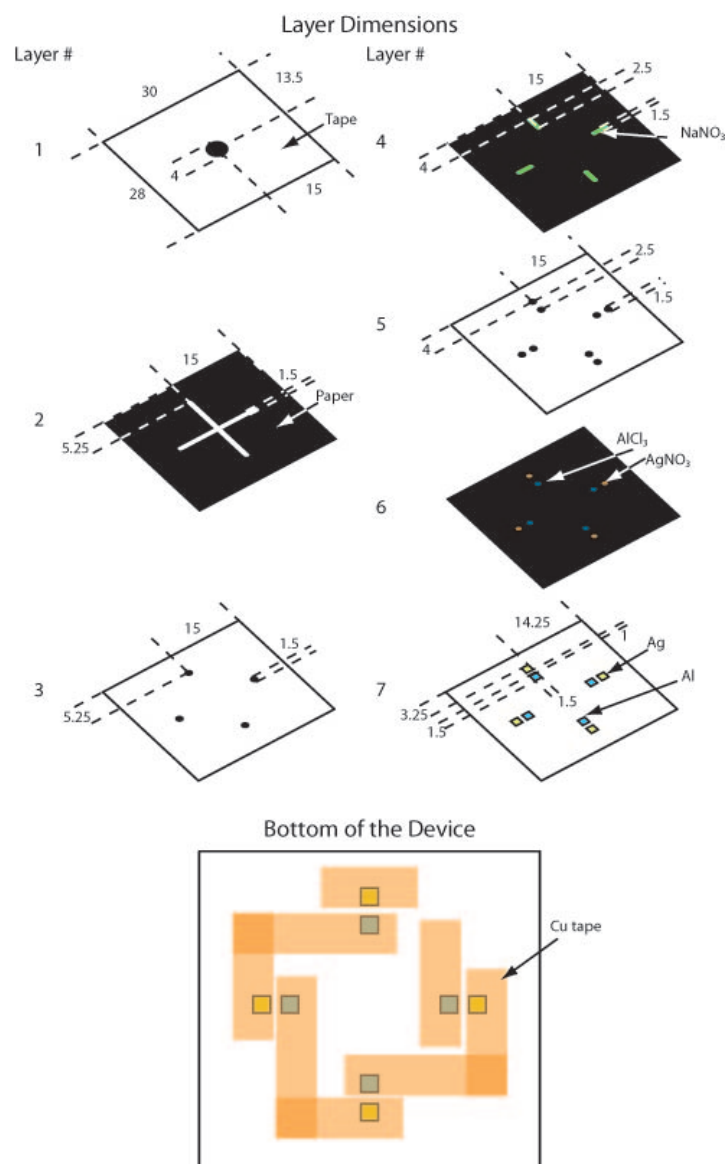

**Figure S23.** Expanded view of a Type 2 device containing 1 cell in parallel and 4 of those in series. All values are listed in mm. The four sets of features are identical, and at a 90° angle.

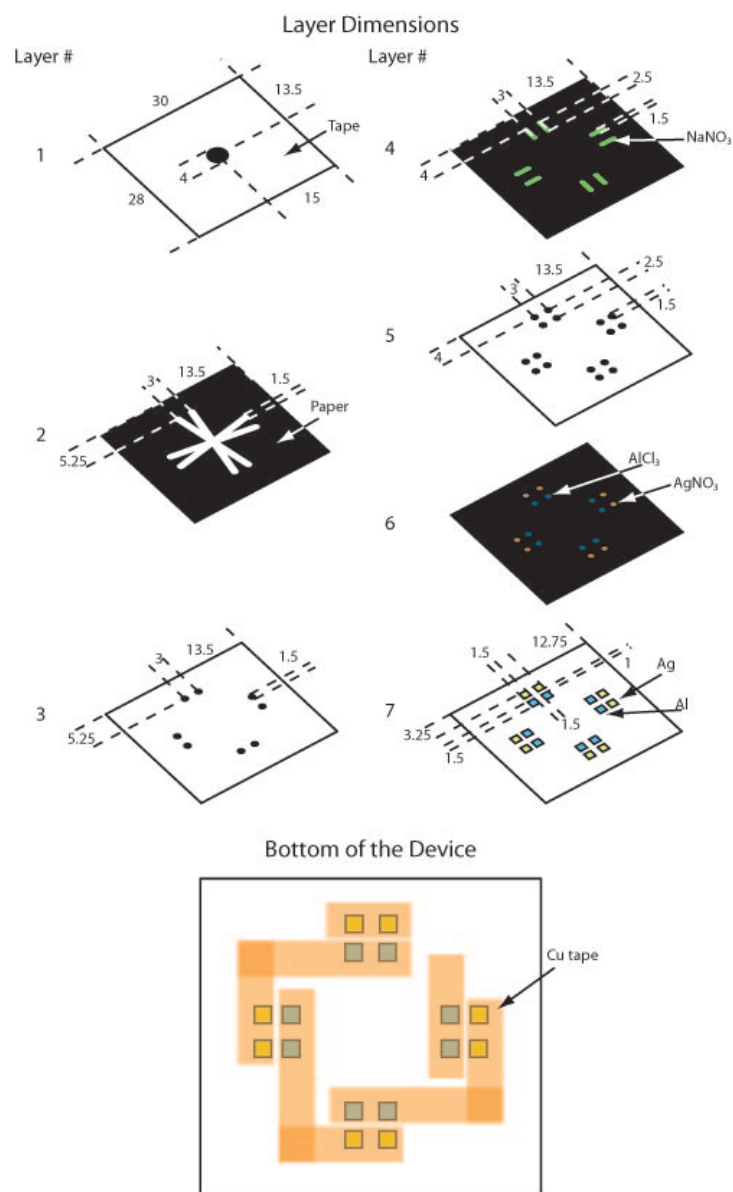

**Figure S24.** Expanded view of a Type 2 device containing 2 cells in parallel and 4 of those in series. All values are listed in mm. The four sets of features are identical, and at a 90° angle.

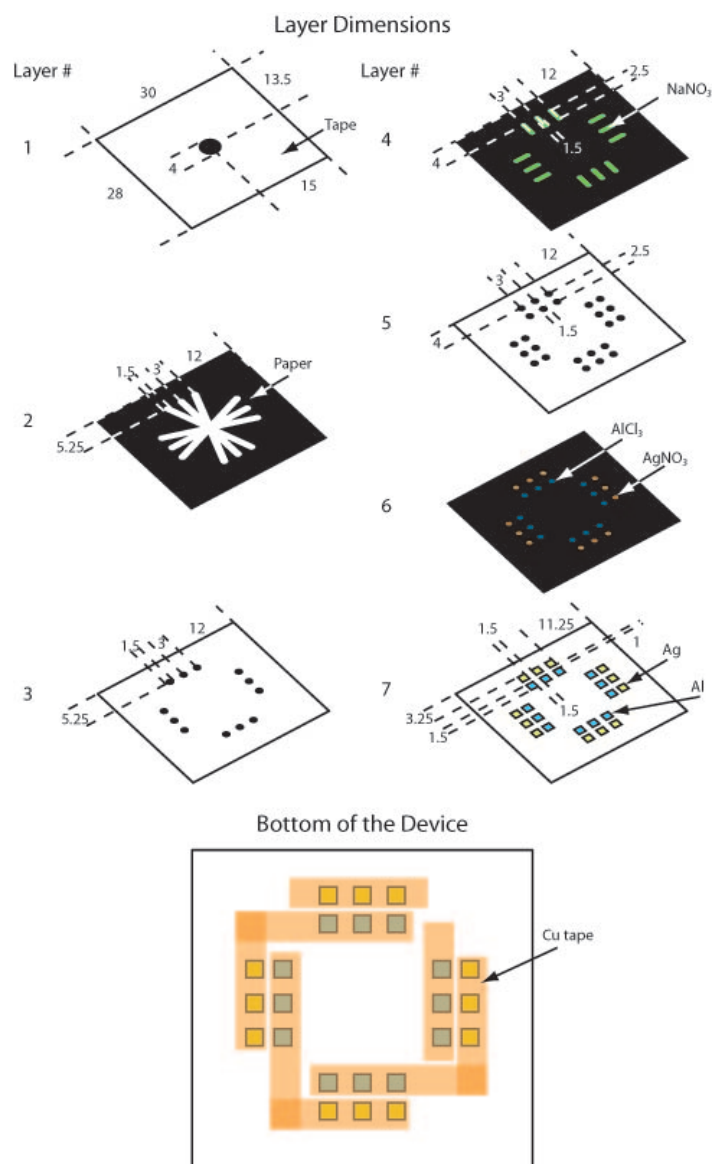

**Figure S25.** Expanded view of a Type 2 device containing 3 cells in parallel and 4 of those in series. All values are listed in mm. The four sets of features are identical, and at a 90° angle.

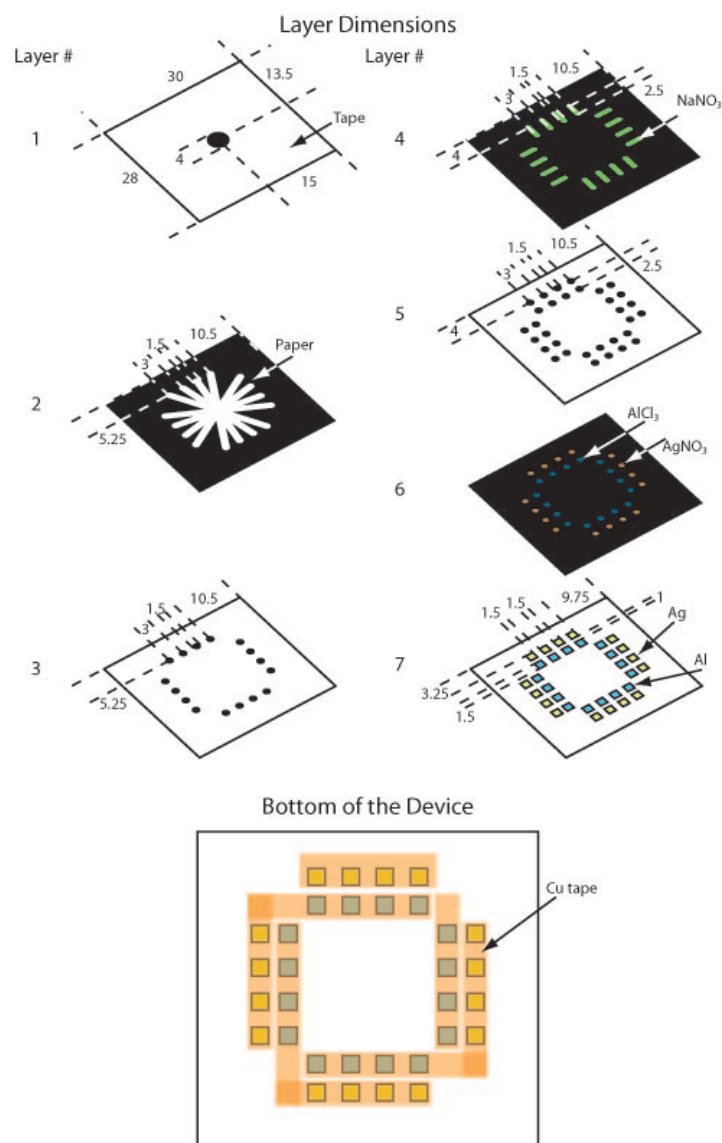

**Figure S26.** Expanded view of a Type 2 device containing 4 cells in parallel and 4 of those in series. All values are listed in mm. The four sets of features are identical, and at a 90° angle.

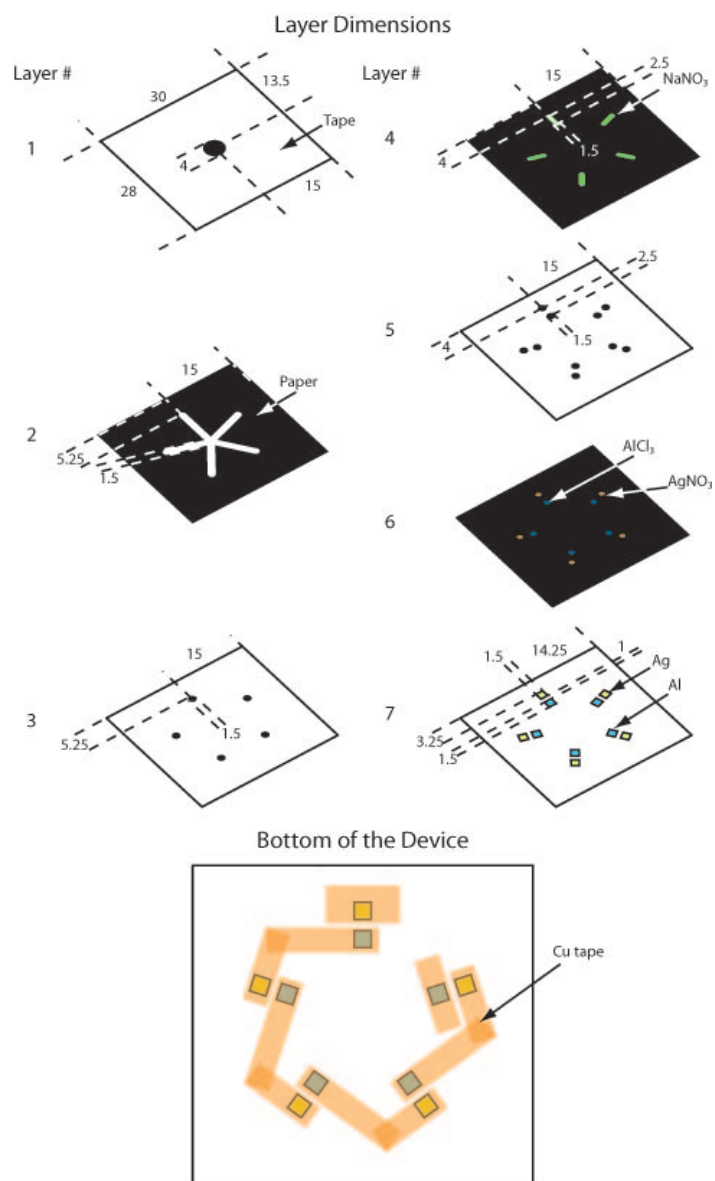

**Figure S27.** Expanded view of a Type 2 device containing 1 cell in parallel and 5 of those in series. All values are listed in mm. The five sets of features are identical, and at a  $72^\circ$  angle.

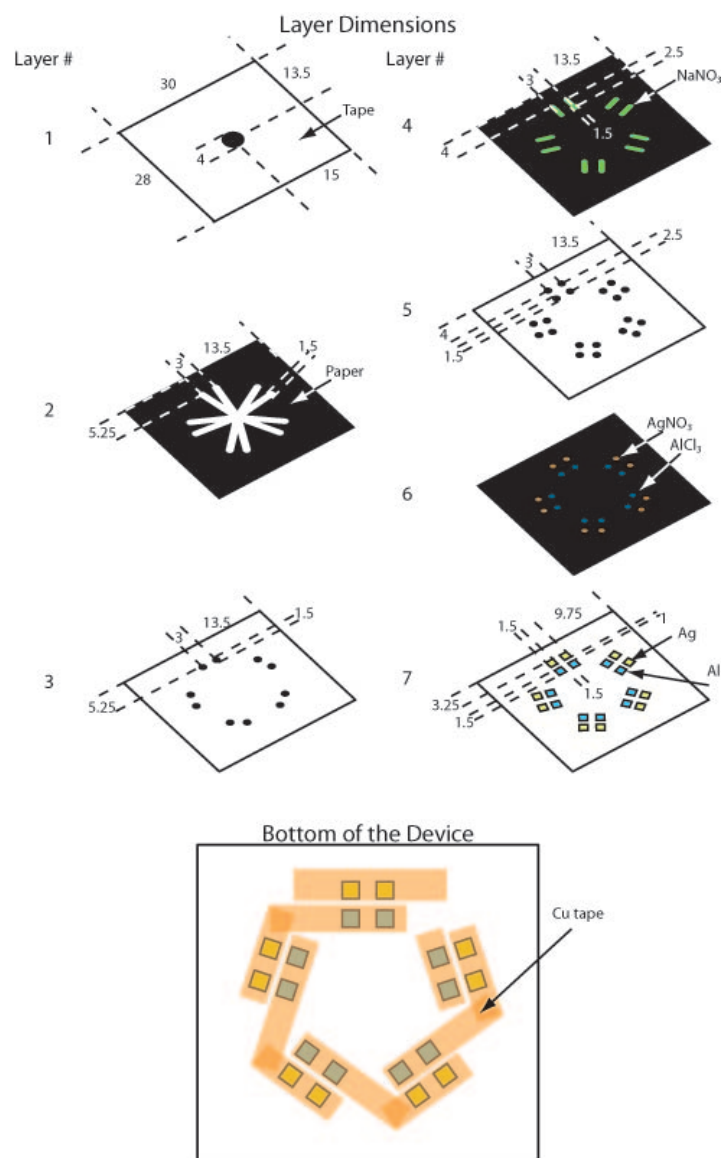

**Figure S28.** Expanded view of a Type 2 device containing 2 cells in parallel and 5 of those in series. All values are listed in mm. The five sets of features are identical, and at a  $72^\circ$  angle.

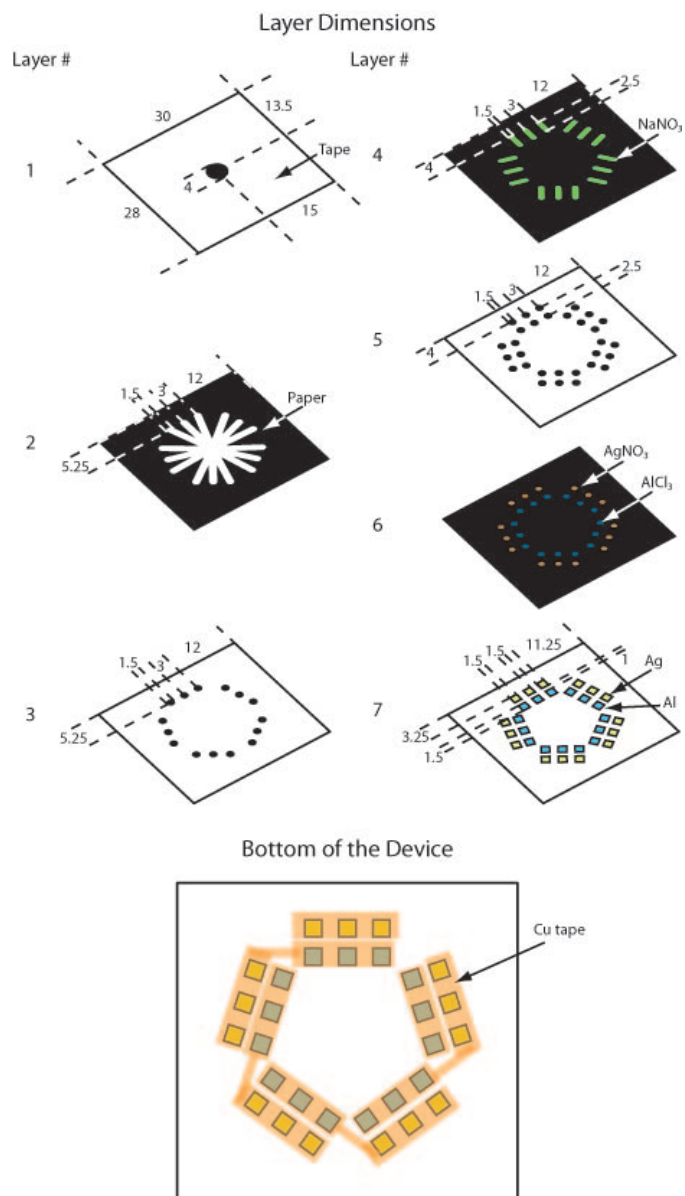

**Figure S29.** Expanded view of a Type 2 device containing 3 cells in parallel and 5 of those in series. All values are listed in mm. The five sets of features are identical, and at a 72° angle.

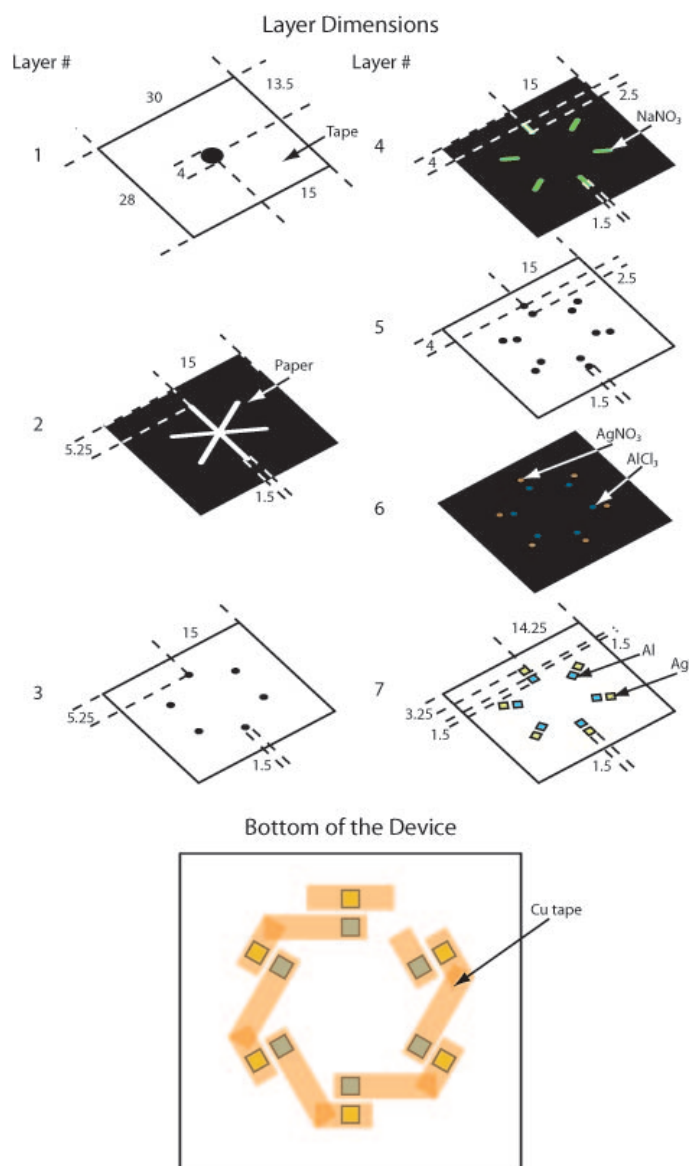

**Figure S30.** Expanded view of a Type 2 device containing 1 cell in parallel and 6 of those in series. All values are listed in mm. The six sets of features are identical, and at a 60° angle.

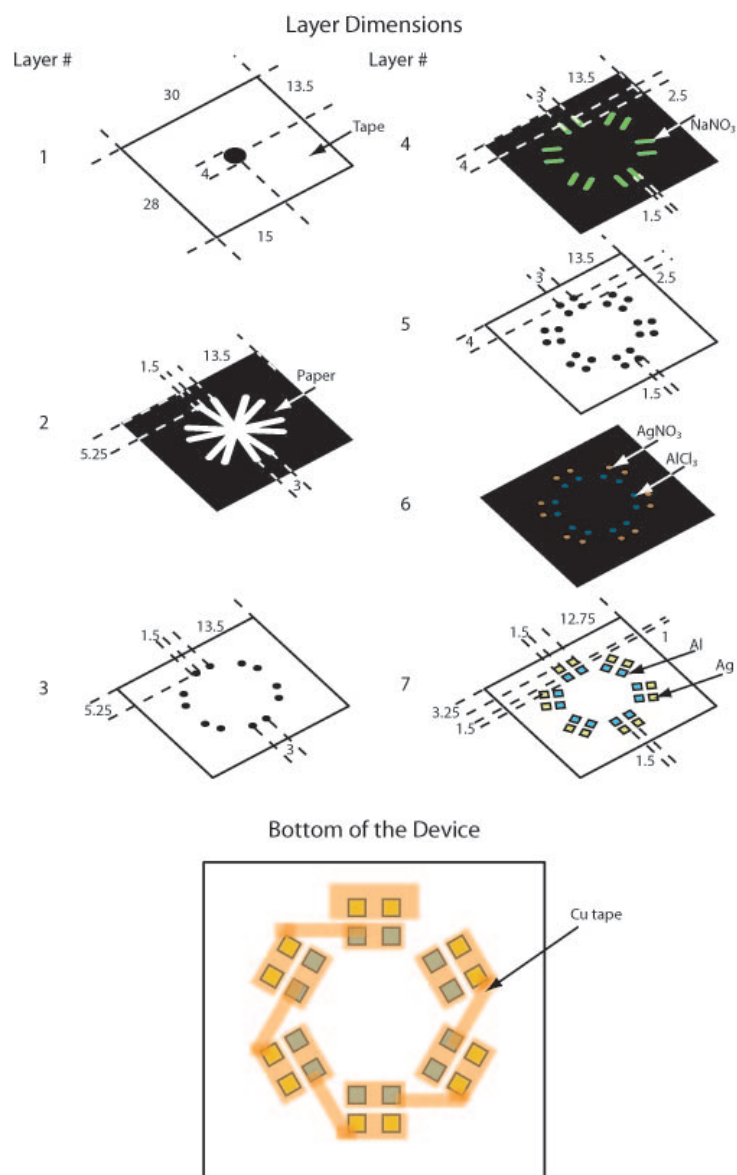

**Figure S31.** Expanded view of a Type 2 device containing 2 cells in parallel and 6 of those in series. All values are listed in mm. The six sets of features are identical, and at a 60° angle.

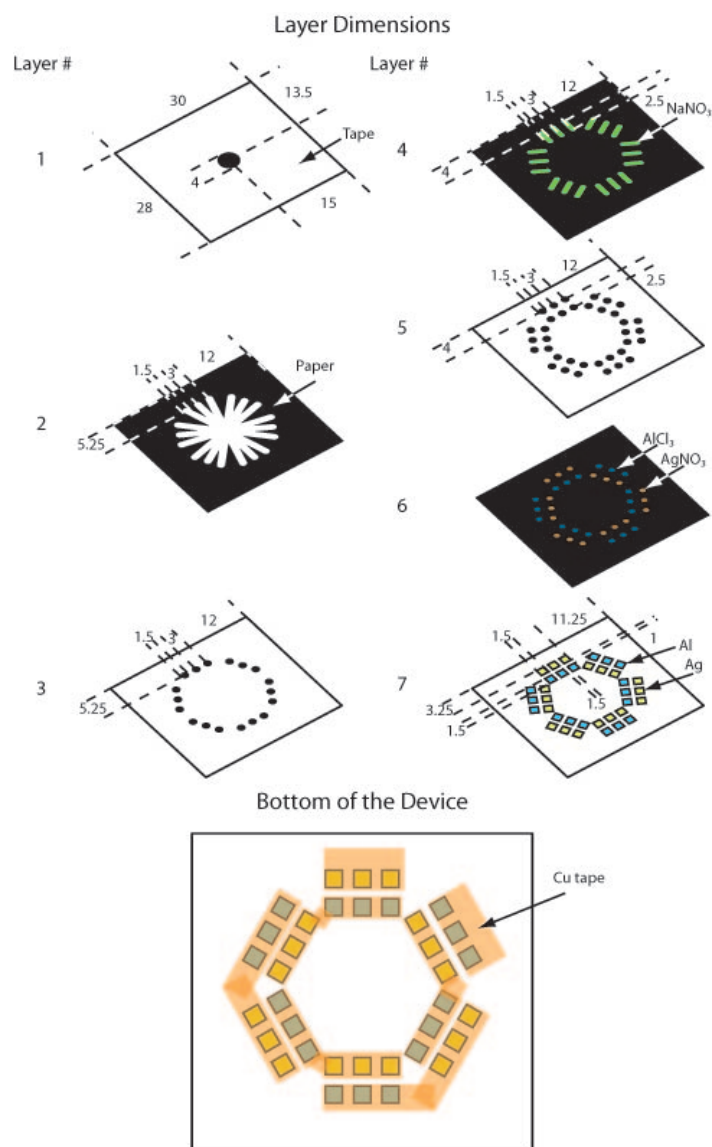

**Figure S32.** Expanded view of a Type 2 device containing 3 cells in parallel and 6 of those in series. All values are listed in mm. The six sets of features are identical, and at a 60° angle.

**Table S27.** Results from measurements of a Type 2 device containing 2 cells in parallel and 3 of those in series. This data was collected after using 20  $\mu\text{L}$  deionized water to start the battery in Figure S18.

| Time<br>(min) | Current ( $\mu\text{A}$ ) |            |            |            |            |            |            | Potential (V) |            |            |
|---------------|---------------------------|------------|------------|------------|------------|------------|------------|---------------|------------|------------|
|               | Trial<br>1                | Trial<br>2 | Trial<br>3 | Trial<br>4 | Trial<br>5 | Trial<br>6 | Trial<br>7 | Trial<br>1    | Trial<br>2 | Trial<br>3 |
| 0             | 0                         | 0          | 0          | 0          | 0          | 0          | 0          | 0.00          | 0.00       | 0.00       |
| 0.5           | 0                         | 0          | 0          | 0          | 0          | 0          | 0          | 0.00          | 0.00       | 0.00       |
| 1             | 0                         | 0          | 0          | 0          | 0          | 0          | 0          | 0.00          | 0.00       | 0.00       |
| 1.5           | 0                         | 0          | 0          | 0          | 0          | 0          | 8          | 0.00          | 0.25       | 0.60       |
| 2             | 50                        | 170        | 0          | 175        | 90         | 26         | 195        | 2.90          | 1.60       | 3.30       |
| 2.5           | 400                       | 350        | 178        | 333        | 123        | 100        | 325        | 3.56          | 3.80       | 3.98       |
| 3             | 606                       | 490        | 490        | 388        | 235        | 215        | 500        | 4.00          | 3.94       | 4.07       |
| 3.5           | 738                       | 400        | 460        | 393        | 320        | 316        | 605        | 3.98          | 3.95       | 4.06       |
| 4             | 775                       | 420        | 480        | 663        | 388        | 425        | 600        | 4.01          | 3.95       | 4.01       |
| 4.5           | 785                       | 460        | 463        | 675        | 435        | 500        | 680        | 3.98          | 3.97       | 4.00       |
| 5             | 770                       | 466        | 740        | 755        | 485        | 540        | 697        | 3.97          | 3.97       | 3.99       |
| 5.5           | 730                       | 770        | 710        | 695        | 530        | 595        | 693        | 3.97          | 3.93       | 3.98       |
| 6             | 620                       | 710        | 655        | 665        | 570        | 595        | 715        | 3.94          | 3.94       | 3.97       |
| 6.5           | 520                       | 580        | 665        | 707        | 585        | 590        | 710        | 3.93          | 3.91       | 3.94       |
| 7             | 360                       | 535        | 580        | 670        | 572        | 590        | 610        | 3.89          | 3.90       | 3.94       |
| 7.5           | 265                       | 500        | 500        | 585        | 561        | 585        | 330        | 3.87          | 3.86       | 3.92       |
| 8             | 240                       | 455        | -          | 505        | -          | 575        | 173        | 3.87          | 3.85       | 3.90       |
| 8.5           | 200                       | 390        | -          | 320        | -          | 560        | 96         | 3.88          | 3.83       | 3.88       |
| 9             | 185                       | 390        | -          | 160        | 500        | 452        | 92         | 3.79          | 3.82       | 3.86       |
| 9.5           | 160                       | 300        | -          | 187        | 430        | 360        | 95         | 3.76          | 3.79       | 3.85       |
| 10            | 97                        | 200        | -          | 150        | -          | 295        | 93         | 3.76          | 3.79       | 3.85       |

**Table S28.** Results from measurements of a Type 2 device containing 3 cells in parallel and 3 of those in series. This data was collected after using 40  $\mu\text{L}$  deionized water to start the battery in Figure S19.

| Time<br>(min) | Current ( $\mu\text{A}$ ) |            |            | Potential (V) |            |            |
|---------------|---------------------------|------------|------------|---------------|------------|------------|
|               | Trial<br>1                | Trial<br>2 | Trial<br>3 | Trial<br>1    | Trial<br>2 | Trial<br>3 |
| 0             | 0                         | 0          | 0          | 0.00          | 0.00       | 0.00       |
| 0.5           | 0                         | 0          | 0          | 0.00          | 0.00       | 0.00       |
| 1             | 0                         | 0          | 0          | 0.08          | 0.00       | 0.00       |
| 1.5           | 0                         | 0          | 0          | 1.04          | 0.00       | 0.06       |
| 2             | 0                         | 1          | 0          | -             | 0.53       | 1.59       |
| 2.5           | 5                         | 21         | 12         | 2.57          | 2.52       | 3.85       |
| 3             | 30                        | 100        | 95         | 3.45          | 3.53       | 3.98       |
| 3.5           | 115                       | 230        | 158        | 3.79          | 3.86       | 4.03       |
| 4             | 207                       | 345        | 235        | 3.88          | 3.99       | 4.07       |

**Table S28 Continued.** Results from measurements of a Type 2 device containing 3 cells in parallel and 3 of those in series. This data was collected after using 40  $\mu\text{L}$  deionized water to start the battery in Figure S19.

| Time<br>(min) | Current ( $\mu\text{A}$ ) |            |            | Potential (V) |            |            |
|---------------|---------------------------|------------|------------|---------------|------------|------------|
|               | Trial<br>1                | Trial<br>2 | Trial<br>3 | Trial<br>1    | Trial<br>2 | Trial<br>3 |
| 4.5           | 309                       | 450        | 290        | 4.03          | 4.06       | 4.07       |
| 5             | 400                       | 560        | 340        | 4.12          | 4.10       | 4.08       |
| 5.5           | 475                       | 590        | 630        | 4.14          | 4.12       | 4.08       |
| 6             | 540                       | 675        | 670        | 4.15          | 4.14       | 4.08       |
| 6.5           | 585                       | 715        | 730        | 4.16          | 4.14       | 4.08       |
| 7             | 640                       | 720        | 760        | 4.16          | 4.14       | 4.08       |
| 7.5           | 690                       | 780        | 740        | 4.16          | 4.14       | 4.06       |
| 8             | 730                       | 800        | 740        | 4.14          | 4.12       | 4.04       |
| 8.5           | 770                       | 840        | 720        | 4.12          | 4.12       | 4.03       |
| 9             | 800                       | 900        | 680        | 4.14          | 4.11       | 4.01       |
| 9.5           | 810                       | 890        | 500        | 4.13          | 4.09       | 3.99       |
| 10            | 775                       | 860        | 515        | 4.13          | 4.09       | 3.98       |
| 10.5          | 650                       | 660        | 520        | 4.12          | 4.09       | 3.97       |
| 11            | 590                       | 490        | 562        | 4.10          | 4.07       | 3.95       |
| 11.5          | 530                       | 250        | 480        | 4.10          | 4.07       | 3.93       |
| 12            | 450                       | 230        | 460        | 4.06          | 4.07       | 3.92       |

**Table S29.** Results from measurements of a Type 2 device containing 4 cells in parallel and 3 of those in series. This data was collected after using 40  $\mu\text{L}$  deionized water to start the battery in Figure S20.

| Time<br>(min) | Current ( $\mu\text{A}$ ) |            |            |            | Potential (V) |            |            |
|---------------|---------------------------|------------|------------|------------|---------------|------------|------------|
|               | Trial<br>1                | Trial<br>2 | Trial<br>3 | Trial<br>4 | Trial<br>1    | Trial<br>2 | Trial<br>3 |
| 0             | 0                         | 0          | 0          | 0          | 0.00          | 0.00       | 0.00       |
| 0.5           | 0                         | 0          | 0          | 0          | 0.06          | 0.04       | 0.00       |
| 1             | 0                         | 0          | 0          | 0          | 0.77          | 3.00       | 0.04       |
| 1.5           | 9                         | 150        | 8          | -          | 3.99          | 3.98       | 2.93       |
| 2             | 495                       | 680        | 745        | 875        | 3.98          | 3.99       | 3.97       |
| 2.5           | 845                       | 960        | 905        | 1090       | 3.98          | 3.95       | 3.94       |
| 3             | 1008                      | 1045       | 1040       | 1160       | 3.95          | 3.94       | 3.93       |
| 3.5           | 1110                      | 1075       | 1190       | 1150       | 3.92          | 3.92       | 3.94       |
| 4             | 1128                      | 1075       | 1250       | 1110       | 3.91          | 3.91       | 3.91       |
| 4.5           | 1148                      | 1080       | 1245       | 1100       | 3.89          | 3.91       | 3.89       |
| 5             | 1162                      | 1000       | 1148       | 1200       | 3.87          | 3.87       | 3.86       |
| 5.5           | 1135                      | 888        | 1075       | 1200       | 3.85          | 3.87       | 3.83       |
| 6             | 1125                      | 800        | 1050       | 1000       | 3.85          | 3.83       | 3.83       |

**Table S29 Continued.** Results from measurements of a Type 2 device containing 4 cells in parallel and 3 of those in series. This data was collected after using 40  $\mu\text{L}$  deionized water to start the battery in Figure S20.

| Time<br>(min) | Current ( $\mu\text{A}$ ) |            |            |            | Potential (V) |            |            |
|---------------|---------------------------|------------|------------|------------|---------------|------------|------------|
|               | Trial<br>1                | Trial<br>2 | Trial<br>3 | Trial<br>4 | Trial<br>1    | Trial<br>2 | Trial<br>3 |
| 6.5           | 1050                      | 765        | 985        | 790        | 3.82          | 3.81       | 3.83       |
| 7             | 975                       | 719        | 920        | 705        | 3.90          | 3.77       | 3.81       |
| 7.5           | 840                       | 600        | 835        | 645        | 3.77          | 3.76       | 3.82       |
| 8             | 695                       | 550        | 840        | 575        | 3.77          | 3.72       | 3.79       |
| 8.5           | 485                       | 510        | 730        | 485        | 3.76          | 3.70       | 3.78       |
| 9             | 420                       | 475        | 540        | 397        | 3.75          | 3.67       | 3.78       |
| 9.5           | 325                       | 405        | 460        | 302        | 3.72          | 3.68       | 3.75       |
| 10            | 245                       | 385        | 382        | 240        | 3.72          | 3.68       | 3.73       |
| 10.5          | 195                       | 310        | 367        | 195        | 3.70          | 3.64       | 3.70       |
| 11            | 195                       | 235        | 320        | 157        | 3.69          | 3.63       | 3.70       |

**Table S30.** Results from measurements of a Type 2 device containing 5 cells in parallel and 3 of those in series. This data was collected after using 50  $\mu\text{L}$  deionized water to start the battery in Figure S21.

| Time<br>(min) | Current ( $\mu\text{A}$ ) |            |            | Potential (V) |            |            |
|---------------|---------------------------|------------|------------|---------------|------------|------------|
|               | Trial<br>1                | Trial<br>2 | Trial<br>3 | Trial<br>1    | Trial<br>2 | Trial<br>3 |
| 0             | 0                         | 0          | 0          | 0.00          | 0.00       | 0.00       |
| 0.5           | 0                         | 0          | 0          | 0.02          | 0.02       | 0.04       |
| 1             | 0                         | 0          | 0          | 0.10          | 0.14       | 0.15       |
| 1.5           | 0                         | 40         | 160        | 3.80          | 2.91       | 3.53       |
| 2             | 638                       | 708        | 850        | 4.06          | 3.95       | 4.06       |
| 2.5           | 1095                      | 1030       | 1140       | 4.08          | 4.01       | 4.06       |
| 3             | 1285                      | 1300       | 1205       | 4.08          | 4.02       | 4.07       |
| 3.5           | 1398                      | 1390       | 1340       | 4.06          | 4.00       | 4.03       |
| 4             | 1435                      | 1330       | 1380       | 4.03          | 3.98       | 3.99       |
| 4.5           | 1435                      | 1520       | 1385       | 4.00          | 3.97       | 3.95       |
| 5             | 1410                      | 1540       | 1375       | 3.96          | 3.95       | 3.93       |
| 5.5           | 1365                      | 1427       | 1330       | 3.95          | 3.93       | 3.91       |
| 6             | 1270                      | 1395       | 1350       | 3.93          | 3.92       | 3.89       |
| 6.5           | 1130                      | 1450       | 1230       | 3.90          | 3.90       | 3.86       |
| 7             | 1012                      | 1240       | 1035       | 3.89          | 3.88       | 3.84       |
| 7.5           | 975                       | 1085       | 860        | 3.86          | 3.88       | 3.81       |
| 8             | 935                       | 915        | 735        | 3.84          | 3.86       | 3.78       |
| 8.5           | 875                       | 812        | 590        | 3.83          | 3.84       | 3.76       |
| 9             | 760                       | 640        | 725        | 3.80          | 3.82       | 3.73       |
| 9.5           | 620                       | 520        | 665        | 3.79          | 3.81       | 3.73       |

**Table S30 Continued.** Results from measurements of a Type 2 device containing 5 cells in parallel and 3 of those in series. This data was collected after using 50  $\mu\text{L}$  deionized water to start the battery in Figure S21.

| Time<br>(min) | Current ( $\mu\text{A}$ ) |            |            | Potential (V) |            |            |
|---------------|---------------------------|------------|------------|---------------|------------|------------|
|               | Trial<br>1                | Trial<br>2 | Trial<br>3 | Trial<br>1    | Trial<br>2 | Trial<br>3 |
| 10            | 520                       | 415        | 610        | 3.78          | 3.79       | 3.70       |
| 10.5          | 380                       | 340        | 515        | 3.77          | 3.76       | 3.69       |
| 11            | 312                       | 310        | 455        | 3.76          | 3.76       | 3.68       |
| 11.5          | 285                       | 309        | 447        | 3.74          | 3.74       | 3.68       |
| 12            | 275                       | 300        | 440        | 3.73          | 3.72       | 3.66       |

**Table S31.** Results from measurements of a Type 2 device containing 6 cells in parallel and 3 of those in series. This data was collected after using 50  $\mu\text{L}$  deionized water to start the battery in Figure S22.

| Time<br>(min) | Current ( $\mu\text{A}$ ) |            |            | Potential (V) |            |            |
|---------------|---------------------------|------------|------------|---------------|------------|------------|
|               | Trial<br>1                | Trial<br>2 | Trial<br>3 | Trial<br>1    | Trial<br>2 | Trial<br>3 |
| 0             | 0                         | 0          | 0          | 0.00          | 0.00       | 0.00       |
| 0.5           | 0                         | 0          | 0          | 0.01          | 0.01       | 0.01       |
| 1             | 0                         | 0          | 0          | 0.00          | 0.01       | 0.02       |
| 1.5           | 0                         | 0          | 0          | 0.05          | 0.15       | 0.31       |
| 2             | 5                         | 3          | -          | 1.25          | 2.36       | 3.27       |
| 2.5           | 106                       | 32         | -          | 3.50          | 3.65       | 3.95       |
| 3             | 234                       | 252        | 175        | 3.94          | 3.93       | 4.03       |
| 3.5           | 482                       | 420        | 390        | 4.04          | 4.00       | 4.07       |
| 4             | 775                       | 652        | 620        | 4.08          | 4.06       | 4.08       |
| 4.5           | 1025                      | 1110       | 820        | 4.09          | 4.05       | 4.09       |
| 5             | 1245                      | 1265       | 960        | 4.10          | 4.10       | 4.09       |
| 5.5           | 1370                      | 1355       | 1060       | 4.10          | 4.10       | 4.08       |
| 6             | 1490                      | 1450       | 1180       | 4.07          | 4.10       | 4.08       |
| 6.5           | 1580                      | 1550       | 1230       | 4.07          | 4.09       | 4.07       |
| 7             | 1640                      | 1550       | 1320       | 4.09          | 4.08       | 4.06       |
| 7.5           | 1710                      | 1650       | 1330       | 4.08          | 4.07       | 4.05       |
| 8             | 2020                      | 1670       | 1437       | 4.07          | 4.07       | 4.04       |
| 8.5           | 1900                      | 1630       | 1500       | 4.07          | 4.06       | 4.02       |
| 9             | 1800                      | 1350       | 1500       | 4.05          | 4.05       | 4.02       |
| 9.5           | 1350                      | 1150       | 1490       | 4.04          | 4.05       | 4.00       |
| 10            | 1310                      | 1100       | 1370       | 4.02          | 4.04       | 3.99       |
| 10.5          | 900                       | 800        | 1225       | 4.00          | 4.02       | -          |
| 11            | 750                       | 450        | 1040       | 3.99          | 4.02       | -          |
| 11.5          | 500                       | 295        | 1000       | 3.98          | 4.01       | -          |
| 12            | 350                       | 255        | 800        | 3.98          | 4.00       | -          |

**Table S32.** Results from measurements of a Type 2 device containing 1 cell in parallel and 4 of those in series. This data was collected after using 20  $\mu\text{L}$  deionized water to start the battery in Figure S23.

| Time<br>(min) | Current ( $\mu\text{A}$ ) |            |            |            |            |            |            |            | Potential (V) |            |            |
|---------------|---------------------------|------------|------------|------------|------------|------------|------------|------------|---------------|------------|------------|
|               | Trial<br>1                | Trial<br>2 | Trial<br>3 | Trial<br>4 | Trial<br>5 | Trial<br>6 | Trial<br>7 | Trial<br>8 | Trial<br>1    | Trial<br>2 | Trial<br>3 |
| 0             | 0                         | 0          | 0          | 0          | 0          | 0          | 0          | 0          | 0.00          | 0.00       | 0.00       |
| 0.5           | 0                         | 0          | 0          | 0          | 0          | 0          | 0          | 0          | 0.00          | 0.00       | 0.00       |
| 1             | 0                         | 0          | 0          | 0          | 0          | 0          | 0          | 0          | 0.00          | 0.00       | 0.00       |
| 1.5           | 0                         | 0          | 0          | 0          | 0          | 0          | 0          | 0          | 0.00          | 0.00       | 0.00       |
| 2             | 0                         | 0          | 0          | 0          | 0          | 2          | 0          | 0          | 0.10          | 0.00       | 0.00       |
| 2.5           | 0                         | 0          | 0          | 0          | 0          | 79         | -          | 0          | 1.52          | 0.10       | 0.00       |
| 3             | 4                         | 0          | 4          | 7          | 76         | 115        | -          | 124        | 4.18          | 1.31       | 1.88       |
| 3.5           | 12                        | 12         | 30         | 19         | 168        | 150        | -          | 192        | 4.18          | 4.24       | 3.40       |
| 4             | 29                        | 32         | 100        | 40         | 230        | 185        | 230        | 238        | 5.30          | 4.63       | 4.29       |
| 4.5           | 100                       | -          | 145        | 70         | 253        | 205        | 262        | 268        | 5.40          | 4.66       | 5.26       |
| 5             | 115                       | 56         | 178        | 136        | 270        | -          | 290        | 272        | 5.44          | 4.63       | 5.39       |
| 5.5           | 137                       | 61         | 207        | -          | 285        | 240        | 315        | 275        | 5.47          | 5.16       | 5.45       |
| 6             | 173                       | 82         | 223        | 156        | 291        | 280        | 309        | 270        | 5.47          | 5.22       | 5.47       |
| 6.5           | 225                       | 96         | 240        | 182        | 305        | -          | 313        | 275        | 5.47          | 5.31       | 5.48       |
| 7             | 246                       | -          | 248        | 210        | 300        | 325        | 312        | 275        | 5.46          | 5.36       | 5.49       |
| 7.5           | 260                       | 254        | 260        | 239        | 296        | 311        | 314        | 277        | 5.44          | 5.40       | 5.49       |
| 8             | 270                       | 275        | 273        | 265        | 296        | 327        | 310        | 263        | 5.43          | 5.31       | 5.49       |
| 8.5           | 285                       | 180        | 270        | 275        | 288        | 330        | 295        | 240        | 5.40          | 5.29       | 5.47       |
| 9             | 310                       | 291        | 273        | 288        | 280        | 315        | 275        | 224        | 5.40          | 5.25       | 5.46       |
| 9.5           | 290                       | 295        | -          | 311        | 262        | 265        | 240        | 205        | 5.38          | 5.34       | 5.45       |
| 10            | 303                       | 297        | 273        | 321        | -          | 150        | 153        | 215        | 5.36          | 5.37       | 5.43       |
| 10.5          | 300                       | 305        | 265        | 327        | -          | -          | -          | -          | 5.34          | 5.44       | 5.43       |
| 11            | 283                       | 303        | 230        | 326        | -          | -          | -          | -          | 5.32          | 5.45       | 5.41       |
| 11.5          | 200                       | 297        | 225        | 330        | -          | -          | -          | -          | 5.30          | 5.45       | 5.40       |
| 12            | 173                       | 305        | 154        | 306        | -          | -          | -          | -          | 5.27          | 5.44       | 5.37       |

**Table S33.** Results from measurements of a Type 2 device containing 2 cells in parallel and 4 of those in series. This data was collected after using 30  $\mu\text{L}$  deionized water to start the battery in Figure S24.

| Time<br>(min) | Current ( $\mu\text{A}$ ) |            |            |            |            |            |            |            | Potential (V) |            |            |
|---------------|---------------------------|------------|------------|------------|------------|------------|------------|------------|---------------|------------|------------|
|               | Trial<br>1                | Trial<br>2 | Trial<br>3 | Trial<br>4 | Trial<br>5 | Trial<br>6 | Trial<br>7 | Trial<br>8 | Trial<br>1    | Trial<br>2 | Trial<br>3 |
| 0             | 0                         | 0          | 0          | 0          | 0          | 0          | 0          | 0          | 0.00          | 0.00       | 0.00       |
| 0.5           | 0                         | 0          | 0          | 0          | 0          | 0          | 0          | 0          | 0.00          | 0.00       | 0.00       |
| 1             | 0                         | 0          | 0          | 0          | 0          | 0          | 0          | 0          | 0.05          | 0.00       | 0.15       |
| 1.5           | 0                         | 0          | 0          | 0          | 0          | 4          | 0          | 63         | 0.25          | 0.01       | 0.45       |
| 2             | 2                         | 0          | 0          | 29         | 122        | 195        | 25         | 315        | 0.81          | 0.61       | 2.45       |

**Table S33 Continued.** Results from measurements of a Type 2 device containing 2 cells in parallel and 4 of those in series. This data was collected after using 30  $\mu$ L deionized water to start the battery in Figure S24.

| Time<br>(min) | Current ( $\mu$ A) |            |            |            |            |            |            |            | Potential (V) |            |            |
|---------------|--------------------|------------|------------|------------|------------|------------|------------|------------|---------------|------------|------------|
|               | Trial<br>1         | Trial<br>2 | Trial<br>3 | Trial<br>4 | Trial<br>5 | Trial<br>6 | Trial<br>7 | Trial<br>8 | Trial<br>1    | Trial<br>2 | Trial<br>3 |
| 2.5           | 96                 | 1          | 0          | 221        | 295        | 427        | 227        | 480        | 1.90          | 4.15       | 5.08       |
| 3             | 170                | 42         | 31         | 335        | 460        | 535        | 445        | -          | 2.90          | 5.20       | 4.86       |
| 3.5           | 212                | 80         | 43         | 410        | 570        | 610        | 625        | 732        | 3.62          | 5.36       | 4.40       |
| 4             | 237                | 110        | 54         | 465        | 643        | 665        | 675        | 785        | 4.95          | 5.35       | 5.00       |
| 4.5           | 250                | 133        | 68         | 494        | 675        | 685        | 705        | 820        | 4.60          | 5.34       | 4.66       |
| 5             | 250                | 142        | 79         | 501        | 685        | 700        | 705        | 820        | 5.02          | 5.33       | 5.09       |
| 5.5           | 253                | 157        | 91         | 507        | 680        | 715        | 704        | 815        | 5.05          | 5.28       | 5.15       |
| 6             | 256                | 170        | 104        | 506        | 695        | 702        | 675        | 760        | 5.09          | 5.22       | 5.26       |
| 6.5           | 253                | 191        | 115        | 501        | 700        | 635        | 635        | 580        | 4.96          | 5.21       | 5.25       |
| 7             | 253                | 218        | 127        | 504        | 640        | 575        | 550        | 480        | 5.10          | 5.18       | 4.68       |
| 7.5           | 248                | 225        | 139        | 487        | 624        | 425        | 455        | 285        | 5.11          | 5.14       | 4.99       |
| 8             | 245                | 228        | 168        | 468        | 470        | 342        | 380        | 175        | 5.12          | 5.14       | 5.24       |
| 8.5           | 241                | 235        | 172        | 445        | 390        | 260        | 169        | 100        | 5.10          | 5.09       | 5.15       |
| 9             | 238                | 244        | 173        | 426        | 250        | 121        | 134        | 103        | 5.12          | 5.09       | 5.00       |
| 9.5           | 237                | 243        | 178        | 390        | 195        | 95         | 130        | 100        | 5.17          | 5.10       | 5.15       |
| 10            | 230                | 253        | 215        | 316        | 101        | 88         | 90         | 99         | 5.11          | 5.02       | 5.17       |
| 10.5          | 222                | 254        | 220        | 294        | -          | -          | -          | -          | 5.00          | 5.01       | 5.19       |
| 11            | 175                | 315        | 231        | 273        | -          | -          | -          | -          | 5.10          | 5.00       | 5.18       |
| 11.5          | 228                | 313        | 234        | 233        | -          | -          | -          | -          | 5.08          | 5.03       | 5.17       |
| 12            | 425                | 301        | 235        | 155        | -          | -          | -          | -          | 5.07          | 5.04       | 5.15       |
| 12.5          | 415                | 272        | 238        | 140        | -          | -          | -          | -          | -             | -          | -          |
| 13            | 390                | 237        | 237        | 135        | -          | -          | -          | -          | -             | -          | -          |
| 13.5          | 360                | 195        | 233        | 129        | -          | -          | -          | -          | -             | -          | -          |
| 14            | 340                | 172        | 190        | 113        | -          | -          | -          | -          | -             | -          | -          |
| 14.5          | 350                | 188        | 184        | 93         | -          | -          | -          | -          | -             | -          | -          |
| 15            | 343                | 187        | 179        | 91         | -          | -          | -          | -          | -             | -          | -          |

**Table S34.** Results from measurements of a Type 2 device containing 3 cells in parallel and 4 of those in series. This data was collected after using 40  $\mu$ L deionized water to start the battery in Figure S25.

| Time<br>(min) | Current ( $\mu$ A) |            |            | Potential (V) |            |            |
|---------------|--------------------|------------|------------|---------------|------------|------------|
|               | Trial<br>1         | Trial<br>2 | Trial<br>3 | Trial<br>1    | Trial<br>2 | Trial<br>3 |
| 0             | 0                  | 0          | 0          | 0.00          | 0.00       | 0.00       |
| 0.5           | 0                  | 0          | 0          | 0.00          | 0.00       | 0.00       |
| 1             | 0                  | 0          | 0          | 0.00          | 0.00       | 0.00       |
| 1.5           | 0                  | 0          | 0          | 0.02          | 0.00       | 0.00       |

**Table S34 Continued.** Results from measurements of a Type 2 device containing 3 cells in parallel and 4 of those in series. This data was collected after using 40  $\mu\text{L}$  deionized water to start the battery in Figure S25.

| Time<br>(min) | Current ( $\mu\text{A}$ ) |            |            | Potential (V) |            |            |
|---------------|---------------------------|------------|------------|---------------|------------|------------|
|               | Trial<br>1                | Trial<br>2 | Trial<br>3 | Trial<br>1    | Trial<br>2 | Trial<br>3 |
| 2             | 0                         | 0          | 0          | 0.55          | 0.13       | 1.40       |
| 2.5           | 4                         | 3          | 23         | 2.50          | 1.80       | 3.90       |
| 3             | 62                        | 28         | 88         | 4.40          | 4.01       | 4.90       |
| 3.5           | 123                       | 81         | 168        | 4.50          | 4.58       | 5.29       |
| 4             | 200                       | 148        | 256        | 4.95          | 5.00       | 5.42       |
| 4.5           | 265                       | 300        | 345        | 5.10          | 5.29       | 5.47       |
| 5             | 410                       | 343        | 440        | 5.23          | 5.41       | 5.50       |
| 5.5           | 490                       | 400        | 515        | 5.28          | 5.46       | 5.52       |
| 6             | 510                       | 450        | 610        | 5.40          | 5.47       | 5.52       |
| 6.5           | 645                       | 500        | 590        | 5.43          | 5.47       | 5.52       |
| 7             | 680                       | 515        | 655        | 5.43          | 5.48       | 5.51       |
| 7.5           | 850                       | 515        | 675        | 5.43          | 5.48       | 5.50       |
| 8             | 830                       | 550        | 720        | 5.44          | 5.47       | 5.49       |
| 8.5           | 800                       | 585        | 730        | 5.43          | 5.47       | 5.48       |
| 9             | 775                       | 615        | 750        | 5.41          | 5.46       | 5.47       |
| 9.5           | 750                       | 600        | 750        | 5.31          | 5.44       | 5.46       |
| 10            | 710                       | 605        | 615        | 5.24          | 5.43       | 5.45       |
| 10.5          | 675                       | 515        | 580        | 5.18          | 5.41       | 5.43       |
| 11            | 780                       | 520        | 560        | 5.26          | 5.40       | 5.42       |
| 11.5          | 680                       | 480        | 560        | 5.21          | 5.37       | 5.40       |
| 12            | 400                       | 490        | 520        | 5.20          | 5.36       | 5.39       |

**Table S35.** Results from measurements of a Type 2 device containing 4 cells in parallel and 4 of those in series. This data was collected after using 50  $\mu\text{L}$  deionized water to start the battery in Figure S26.

| Time<br>(min) | Current ( $\mu\text{A}$ ) |            |            | Potential (V) |            |            |
|---------------|---------------------------|------------|------------|---------------|------------|------------|
|               | Trial<br>1                | Trial<br>2 | Trial<br>3 | Trial<br>1    | Trial<br>2 | Trial<br>3 |
| 0             | 0                         | 0          | 0          | 0.00          | 0.00       | 0.00       |
| 0.5           | 0                         | 0          | 0          | 0.00          | 0.00       | 0.00       |
| 1             | 0                         | 0          | 0          | 0.00          | 0.00       | 0.00       |
| 1.5           | 0                         | 0          | 0          | 0.00          | 0.10       | 0.01       |
| 2             | 0                         | 2          | 35         | 0.40          | 3.38       | 3.22       |
| 2.5           | 35                        | 70         | 105        | 4.12          | 5.19       | 4.93       |
| 3             | 88                        | 171        | 207        | 5.12          | 5.31       | 5.30       |
| 3.5           | 170                       | 310        | 325        | 5.24          | 5.40       | 5.40       |
| 4             | 260                       | 425        | 430        | 5.39          | 5.45       | 5.46       |

**Table S35 Continued.** Results from measurements of a Type 2 device containing 4 cells in parallel and 4 of those in series. This data was collected after using 50  $\mu\text{L}$  deionized water to start the battery in Figure S26.

| Time<br>(min) | Current ( $\mu\text{A}$ ) |            |            | Potential (V) |            |            |
|---------------|---------------------------|------------|------------|---------------|------------|------------|
|               | Trial<br>1                | Trial<br>2 | Trial<br>3 | Trial<br>1    | Trial<br>2 | Trial<br>3 |
| 4.5           | 317                       | 518        | 500        | 5.48          | 5.48       | 5.49       |
| 5             | 380                       | 630        | 555        | 5.52          | 5.50       | 5.50       |
| 5.5           | 407                       | 700        | 605        | 5.54          | 5.50       | 5.52       |
| 6             | 435                       | 765        | 645        | 5.55          | 5.50       | 5.52       |
| 6.5           | 590                       | 915        | 685        | 5.54          | 5.49       | 5.49       |
| 7             | 567                       | 975        | 700        | 5.54          | 5.48       | 5.49       |
| 7.5           | 665                       | 1005       | 750        | 5.54          | 5.47       | 5.48       |
| 8             | 690                       | 1045       | 780        | 5.53          | 5.45       | 5.47       |
| 8.5           | 762                       | 975        | 790        | 5.51          | 5.43       | 5.46       |
| 9             | 775                       | 970        | 800        | 5.22          | 5.41       | 5.43       |
| 9.5           | 776                       | 820        | 915        | 5.51          | 5.39       | 5.43       |
| 10            | 775                       | 870        | 920        | 5.42          | 5.37       | 5.40       |
| 10.5          | 820                       | 835        | 820        | 5.47          | 5.35       | 5.40       |
| 11            | 740                       | 800        | 845        | 5.46          | 5.34       | 5.39       |
| 11.5          | 825                       | 601        | 750        | 5.43          | 5.33       | 5.38       |
| 12            | 715                       | 490        | 630        | 5.42          | 5.30       | 5.36       |

**Table S36.** Results from measurements of a Type 2 device containing 1 cell in parallel and 5 of those in series. This data was collected after using 30  $\mu\text{L}$  deionized water to start the battery in Figure S27.

| Time<br>(min) | Current ( $\mu\text{A}$ ) |            |            | Potential (V) |            |            |
|---------------|---------------------------|------------|------------|---------------|------------|------------|
|               | Trial<br>1                | Trial<br>2 | Trial<br>3 | Trial<br>1    | Trial<br>2 | Trial<br>3 |
| 0             | 0                         | 0          | 0          | 0.00          | 0.00       | 0.00       |
| 0.5           | 0                         | 0          | 0          | 0.00          | 0.00       | 0.00       |
| 1             | 0                         | 0          | 0          | 0.00          | 0.00       | 0.00       |
| 1.5           | 0                         | 0          | 0          | 0.00          | 0.00       | 0.00       |
| 2             | 0                         | 0          | 0          | 0.00          | 0.00       | 0.05       |
| 2.5           | 0                         | 0          | 0          | 0.04          | 0.00       | 0.14       |
| 3             | 0                         | 4          | 0          | 0.45          | 0.03       | 0.19       |
| 3.5           | 1                         | 20         | 5          | 2.00          | 1.08       | 0.21       |
| 4             | 22                        | 66         | 18         | 4.28          | 4.63       | 0.23       |
| 4.5           | 43                        | 103        | 45         | 5.55          | 5.61       | -          |
| 5             | 75                        | 133        | 72         | 6.35          | 6.52       | 0.51       |
| 5.5           | 120                       | 173        | 109        | 6.62          | 6.72       | 0.65       |
| 6             | 150                       | 215        | 145        | 6.74          | 6.70       | 0.79       |
| 6.5           | 201                       | 226        | 190        | 6.79          | 6.84       | 0.94       |

**Table S36 Continued.** Results from measurements of a Type 2 device containing 1 cell in parallel and 5 of those in series. This data was collected after using 30  $\mu\text{L}$  deionized water to start the battery in Figure S27.

| Time<br>(min) | Current ( $\mu\text{A}$ ) |            |            | Potential (V) |            |            |
|---------------|---------------------------|------------|------------|---------------|------------|------------|
|               | Trial<br>1                | Trial<br>2 | Trial<br>3 | Trial<br>1    | Trial<br>2 | Trial<br>3 |
| 7             | 218                       | 232        | 220        | 6.83          | 6.66       | 1.10       |
| 7.5           | 240                       | 239        | 233        | 6.84          | 6.87       | 6.79       |
| 8             | 245                       | 249        | 263        | 6.84          | -          | 6.83       |
| 8.5           | 251                       | 251        | 274        | 6.82          | -          | 6.86       |
| 9             | 252                       | 258        | 280        | 6.81          | -          | 6.83       |
| 9.5           | 268                       | 257        | 287        | 6.79          | -          | 6.80       |
| 10            | 270                       | 255        | 285        | 6.78          | 6.78       | 6.78       |
| 10.5          | 273                       | 255        | 274        | 6.75          | 6.75       | -          |
| 11            | 262                       | 236        | 250        | 6.73          | 6.73       | -          |
| 11.5          | 236                       | 215        | 245        | 6.72          | 6.70       | -          |
| 12            | 237                       | 160        | 225        | 6.70          | -          | -          |

**Table S37.** Results from measurements of a Type 2 device containing 2 cells in parallel and 5 of those in series. This data was collected after using 40  $\mu\text{L}$  deionized water to start the battery in Figure S28.

| Time<br>(min) | Current ( $\mu\text{A}$ ) |            |            |            |            |            | Potential (V) |            |            |
|---------------|---------------------------|------------|------------|------------|------------|------------|---------------|------------|------------|
|               | Trial<br>1                | Trial<br>2 | Trial<br>3 | Trial<br>4 | Trial<br>5 | Trial<br>6 | Trial<br>1    | Trial<br>2 | Trial<br>3 |
| 0             | 0                         | 0          | 0          | 0          | 0          | 0          | 0.00          | 0.00       | 0.00       |
| 0.5           | 0                         | 0          | 0          | 0          | 0          | 0          | 0.00          | 0.01       | 0.00       |
| 1             | 0                         | 0          | 0          | 0          | 0          | 0          | 0.02          | 0.02       | 0.01       |
| 1.5           | 4                         | 0          | 0          | 0          | 0          | 0          | 0.53          | 2.11       | 1.71       |
| 2             | 280                       | 100        | 4          | 21         | 0          | 91         | 6.17          | 6.47       | 6.30       |
| 2.5           | 520                       | 337        | 219        | 130        | 104        | 290        | 6.55          | 6.60       | 6.57       |
| 3             | 675                       | 485        | 445        | 360        | 272        | 500        | 6.56          | 6.58       | 6.58       |
| 3.5           | 765                       | 545        | 540        | 490        | 350        | 630        | 6.54          | 6.52       | 6.55       |
| 4             | 760                       | 675        | 580        | 570        | 410        | 700        | 6.54          | 6.51       | 6.51       |
| 4.5           | 735                       | 665        | 620        | 620        | 414        | 740        | 6.52          | 6.51       | 6.53       |
| 5             | 675                       | 632        | 652        | 630        | 440        | 785        | 6.53          | 6.48       | 6.53       |
| 5.5           | 645                       | 575        | 670        | 687        | 460        | 780        | 6.51          | 6.46       | 6.53       |
| 6             | 585                       | 580        | 630        | 685        | 480        | 790        | 6.49          | 6.44       | 6.49       |
| 6.5           | 490                       | 535        | 585        | 690        | 470        | 770        | 6.47          | 6.42       | 6.47       |
| 7             | 405                       | 490        | 580        | 655        | 450        | 690        | 6.46          | 6.41       | 6.45       |
| 7.5           | 380                       | 420        | 575        | 660        | 800        | 630        | 6.44          | 6.40       | 6.42       |
| 8             | 335                       | 350        | 430        | 590        | 750        | 456        | 6.41          | 6.39       | 6.41       |
| 8.5           | 160                       | 300        | 420        | 540        | 662        | 320        | 6.39          | 6.37       | 6.40       |
| 9             | 155                       | 265        | 365        | 430        | 640        | 191        | 6.39          | 6.35       | 6.36       |

**Table S37 Continued.** Results from measurements of a Type 2 device containing 2 cells in parallel and 5 of those in series. This data was collected after using 40  $\mu\text{L}$  deionized water to start the battery in Figure S28.

| Time<br>(min) | Current ( $\mu\text{A}$ ) |            |            |            |            |            | Potential (V) |            |            |
|---------------|---------------------------|------------|------------|------------|------------|------------|---------------|------------|------------|
|               | Trial<br>1                | Trial<br>2 | Trial<br>3 | Trial<br>4 | Trial<br>5 | Trial<br>6 | Trial<br>1    | Trial<br>2 | Trial<br>3 |
| 9.5           | 147                       | 191        | 302        | 202        | 545        | 106        | 6.35          | 6.36       | 6.35       |
| 10            | 137                       | 150        | 215        | 198        | 450        | 101        | 6.33          | 6.35       | 6.32       |
| 10.5          | 128                       | 120        | 130        | 160        | 270        | -          | 6.33          | 6.30       | 6.31       |
| 11            | 120                       | 100        | 122        | 94         | 240        | -          | 6.29          | 6.31       | 6.29       |
| 11.5          | 108                       | 95         | -          | 78         | 178        | -          | 3.28          | 6.29       | 6.28       |
| 12            | 78                        | 83         | -          | -          | 105        | -          | 6.25          | 6.28       | 6.27       |

**Table S38.** Results from measurements of a Type 2 device containing 3 cells in parallel and 5 of those in series. This data was collected after using 50  $\mu\text{L}$  deionized water to start the battery in Figure S29.

| Time<br>(min) | Current ( $\mu\text{A}$ ) |            |            | Potential (V) |            |            |
|---------------|---------------------------|------------|------------|---------------|------------|------------|
|               | Trial<br>1                | Trial<br>2 | Trial<br>3 | Trial<br>1    | Trial<br>2 | Trial<br>3 |
| 0             | 0                         | 0          | 0          | 0.00          | 0.00       | 0.00       |
| 0.5           | 0                         | 0          | 0          | 0.00          | 0.00       | 0.00       |
| 1             | 0                         | 0          | 0          | 0.00          | 0.00       | 0.00       |
| 1.5           | 0                         | 0          | 0          | 0.00          | 0.00       | 0.00       |
| 2             | 12                        | 0          | 1          | 0.03          | 0.21       | 0.55       |
| 2.5           | 35                        | 1          | 25         | 3.05          | 1.80       | 3.67       |
| 3             | 80                        | 36         | 175        | 4.97          | 5.94       | 5.70       |
| 3.5           | 140                       | 104        | 275        | 6.04          | 6.47       | 5.96       |
| 4             | 282                       | 202        | 360        | 6.51          | 6.64       | 6.68       |
| 4.5           | 500                       | 315        | 460        | 6.54          | 6.67       | 6.76       |
| 5             | 605                       | 415        | 506        | 6.76          | 6.53       | 6.81       |
| 5.5           | 659                       | 535        | 595        | 6.77          | 6.79       | 6.82       |
| 6             | 715                       | 640        | 670        | 6.85          | 6.85       | 6.81       |
| 6.5           | 745                       | 700        | 715        | 6.86          | 6.85       | 6.89       |
| 7             | 768                       | 745        | 750        | 6.86          | 6.84       | 6.90       |
| 7.5           | 800                       | 735        | 775        | 6.85          | 6.83       | 6.90       |
| 8             | 785                       | 700        | 700        | 6.83          | 6.83       | 6.89       |
| 8.5           | 675                       | 575        | 660        | 6.81          | 6.80       | 6.88       |
| 9             | 570                       | 580        | 660        | 6.79          | 6.79       | 6.50       |
| 9.5           | 510                       | 590        | 626        | 6.77          | 6.58       | 6.57       |
| 10            | 272                       | 615        | 575        | 6.76          | 6.76       | 6.45       |
| 10.5          | 176                       | 573        | 565        | 6.74          | 6.73       | -          |
| 11            | 164                       | 515        | 525        | 6.72          | 6.71       | -          |
| 11.5          | 157                       | 510        | 400        | 6.69          | 6.69       | -          |

**Table S38 Continued.** Results from measurements of a Type 2 device containing 3 cells in parallel and 5 of those in series. This data was collected after using 50  $\mu\text{L}$  deionized water to start the battery in Figure S29.

| Time<br>(min) | Current ( $\mu\text{A}$ ) |            |            | Potential (V) |            |            |
|---------------|---------------------------|------------|------------|---------------|------------|------------|
|               | Trial<br>1                | Trial<br>2 | Trial<br>3 | Trial<br>1    | Trial<br>2 | Trial<br>3 |
| 12            | 153                       | 355        | 360        | 6.66          | 6.66       | -          |

**Table S39.** Results from measurements of a Type 2 device containing 1 cell in parallel and 6 of those in series. This data was collected after using 30  $\mu\text{L}$  deionized water to start the battery in Figure S30.

| Time<br>(min) | Current ( $\mu\text{A}$ ) |            |            |            | Potential (V) |            |            |
|---------------|---------------------------|------------|------------|------------|---------------|------------|------------|
|               | Trial<br>1                | Trial<br>2 | Trial<br>3 | Trial<br>4 | Trial<br>1    | Trial<br>2 | Trial<br>3 |
| 0             | 0                         | 0          | 0          | 0          | 0.00          | 0.00       | 0.00       |
| 0.5           | 0                         | 0          | 0          | 0          | 0.00          | 0.00       | 0.00       |
| 1             | 0                         | 0          | 0          | 0          | 0.00          | 0.00       | 0.00       |
| 1.5           | 0                         | 0          | 0          | 0          | 0.00          | 0.00       | 0.00       |
| 2             | 0                         | 0          | 0          | 0          | 0.00          | 0.00       | 0.00       |
| 2.5           | 0                         | 0          | 0          | 0          | -             | 0.06       | 0.00       |
| 3             | 0                         | 1          | 0          | 0          | -             | 0.16       | 0.04       |
| 3.5           | 13                        | 6          | 7          | 1          | 6.64          | 0.40       | 0.24       |
| 4             | 50                        | 22         | 21         | 9          | 7.39          | 6.66       | 0.49       |
| 4.5           | 93                        | 46         | 45         | 28         | 7.77          | 7.01       | 2.19       |
| 5             | 146                       | 80         | 80         | 75         | 7.80          | 7.60       | 4.98       |
| 5.5           | 229                       | 131        | 127        | 112        | 8.01          | 7.74       | 6.72       |
| 6             | 245                       | 164        | 175        | 158        | 8.05          | 7.81       | 7.02       |
| 6.5           | 266                       | 180        | 215        | 224        | 8.07          | 7.82       | 7.75       |
| 7             | 270                       | 200        | 230        | 260        | 8.11          | 7.85       | 7.99       |
| 7.5           | 283                       | 225        | 245        | 267        | 8.12          | 8.05       | 7.83       |
| 8             | 290                       | 250        | 250        | 272        | 8.11          | 8.12       | 8.13       |
| 8.5           | 300                       | 270        | 255        | 278        | 8.10          | 8.10       | 8.16       |
| 9             | 305                       | 275        | 262        | 287        | 8.09          | 8.08       | 8.15       |
| 9.5           | 305                       | 275        | 268        | 295        | 8.09          | 7.32       | 8.16       |
| 10            | 290                       | 282        | 279        | 295        | 7.70          | 7.93       | 8.16       |
| 10.5          | 240                       | 285        | 283        | 290        | 8.05          | 7.81       | 8.14       |
| 11            | 195                       | 270        | 282        | 255        | 8.05          | 7.73       | 8.13       |
| 11.5          | 180                       | 246        | 249        | 225        | 8.03          | 8.01       | 8.12       |
| 12            | 135                       | 207        | 200        | 207        | 8.05          | 8.01       | 7.86       |

**Table S40.** Results from measurements of a Type 2 device containing 2 cells in parallel and 6 of those in series. This data was collected after using 40  $\mu$ L deionized water to start the battery in Figure S31.

| Time<br>(min) | Current ( $\mu$ A) |            |            |            | Potential (V) |            |            |
|---------------|--------------------|------------|------------|------------|---------------|------------|------------|
|               | Trial<br>1         | Trial<br>2 | Trial<br>3 | Trial<br>4 | Trial<br>1    | Trial<br>2 | Trial<br>3 |
| 0             | 0                  | 0          | 0          | 0          | 0.00          | 0.00       | 0.00       |
| 0.5           | 0                  | 0          | 0          | 0          | 0.00          | 0.00       | 0.00       |
| 1             | 0                  | 0          | 0          | 0          | 0.06          | 0.31       | 0.00       |
| 1.5           | 0                  | 0          | 0          | 0          | -             | 6.91       | 0.34       |
| 2             | 284                | 0          | 43         | 127        | 0.50          | 7.52       | 3.65       |
| 2.5           | 500                | 100        | 207        | 356        | 0.76          | 7.55       | 7.16       |
| 3             | 645                | 500        | 365        | 475        | 0.77          | 7.64       | 7.66       |
| 3.5           | 755                | 585        | 495        | 615        | -             | 7.62       | 7.70       |
| 4             | 775                | 685        | 560        | 660        | 7.99          | 7.60       | 7.65       |
| 4.5           | 740                | 742        | 620        | 718        | 7.98          | 7.61       | 7.63       |
| 5             | 750                | 727        | 660        | 723        | 7.95          | 7.62       | 7.58       |
| 5.5           | 709                | 690        | 675        | 775        | 7.90          | 7.58       | 7.58       |
| 6             | 660                | 682        | 690        | 768        | 7.86          | 7.56       | 7.56       |
| 6.5           | 580                | 635        | 700        | 733        | 7.82          | 7.56       | 7.52       |
| 7             | 495                | 552        | 680        | 682        | 7.80          | 7.51       | 7.52       |
| 7.5           | 420                | 500        | 645        | 550        | 7.73          | 7.48       | 7.49       |
| 8             | 345                | 440        | 580        | 415        | 7.70          | 7.38       | 7.47       |
| 8.5           | 238                | 390        | 405        | 293        | 7.69          | 7.39       | 7.45       |
| 9             | 215                | 351        | 250        | 190        | 7.66          | 7.36       | 7.45       |
| 9.5           | 285                | 253        | 145        | 122        | 7.64          | 7.34       | 7.43       |
| 10            | 210                | 145        | 79         | 126        | 7.62          | 7.32       | 7.41       |
| 10.5          | 209                | 99         | -          | 124        | -             | -          | -          |
| 11            | 308                | -          | -          | -          | -             | -          | -          |
| 11.5          | 161                | -          | -          | -          | -             | -          | -          |
| 12            | 232                | -          | -          | -          | -             | -          | -          |

**Table S41.** Results from measurements of a Type 2 device containing 3 cells in parallel and 6 of those in series. This data was collected after using 40  $\mu$ L deionized water to start the battery in Figure S32.

| Time<br>(min) | Current ( $\mu$ A) |            |            |            | Potential (V) |            |            |
|---------------|--------------------|------------|------------|------------|---------------|------------|------------|
|               | Trial<br>1         | Trial<br>2 | Trial<br>3 | Trial<br>4 | Trial<br>1    | Trial<br>2 | Trial<br>3 |
| 0             | 0                  | 0          | 0          | 0          | 0.00          | 0.00       | 0.00       |
| 0.5           | 0                  | 0          | 0          | 0          | 0.00          | 0.00       | 0.25       |
| 1             | 0                  | 0          | 0          | 0          | 0.00          | 0.00       | 1.28       |
| 1.5           | 0                  | 0          | 0          | -          | 0.00          | 0.00       | 6.26       |
| 2             | 0                  | 0          | 4          | -          | 1.19          | 2.53       | 7.78       |

**Table S41 Continued.** Results from measurements of a Type 2 device containing 3 cells in parallel and 6 of those in series. This data was collected after using 40 µL deionized water to start the battery in Figure S32.

| Time<br>(min) | Current (µA) |            |            |            | Potential (V) |            |            |
|---------------|--------------|------------|------------|------------|---------------|------------|------------|
|               | Trial<br>1   | Trial<br>2 | Trial<br>3 | Trial<br>4 | Trial<br>1    | Trial<br>2 | Trial<br>3 |
| 2.5           | 10           | 13         | 46         | 86         | 5.54          | 5.68       | 7.02       |
| 3             | 70           | 64         | 160        | 190        | 7.27          | 7.06       | 6.77       |
| 3.5           | 120          | 112        | 262        | 355        | 7.82          | 7.84       | 6.82       |
| 4             | 195          | 173        | 302        | 535        | 8.03          | 8.01       | 6.83       |
| 4.5           | 260          | 275        | 415        | 607        | 8.11          | 8.11       | 6.70       |
| 5             | 428          | 350        | 420        | 742        | 8.18          | 8.16       | 8.11       |
| 5.5           | 340          | 410        | 525        | 698        | 8.20          | 8.19       | 8.19       |
| 6             | 500          | -          | 575        | 675        | 8.21          | 8.21       | 8.16       |
| 6.5           | 545          | 425        | 640        | 732        | 8.21          | 8.21       | 8.13       |
| 7             | 560          | 457        | 630        | 630        | 8.19          | 8.23       | 8.12       |
| 7.5           | 620          | 475        | 741        | 600        | 8.18          | 8.22       | 8.09       |
| 8             | 550          | 475        | 705        | 560        | 8.16          | 8.22       | 8.05       |
| 8.5           | 650          | 440        | 675        | 525        | 8.15          | 8.22       | 8.02       |
| 9             | 610          | 415        | 640        | 473        | 8.13          | 8.21       | 7.96       |
| 9.5           | 590          | 420        | 630        | 420        | 8.11          | 8.17       | 7.93       |
| 10            | 520          | 375        | 590        | 410        | 8.11          | 8.10       | 7.91       |
| 10.5          | 500          | 350        | 540        | 393        | 8.08          | 8.13       | 7.87       |
| 11            | 450          | 330        | 460        | 372        | 8.07          | 8.12       | 7.83       |
| 11.5          | 480          | 315        | 385        | 445        | 8.06          | 8.05       | 7.77       |
| 12            | -            | 285        | 300        | 365        | 8.04          | 8.08       | 7.74       |

**Predicting the Maximum Current**

For all of the following calculations,  $A$  is the maximum current in µA,  $P$  is the number of cells in parallel,  $S$  is the number of cells in series,  $m$  is the slope of the linear regression, and  $b$  is the y-intercept of the linear regression.

**Design Type 2.** The maximum measured current values for Design Type 2 devices containing 3 sets of cells in series were plotted against the number of cells in parallel used to obtain the measured current. The linear regression of the maximum current versus the number of cells in parallel gives the equation  $A = m(P) + b$ . The slope and y-intercept determined from the linear regression were recorded. This process was repeated for Design Type 2 devices containing 4, 5, and 6 sets of cells in series; the values from the linear regression analyses are recorded in Table S42.

**Table S42.** Maximum measured current for Design Type 2 devices plotted against the number cells in parallel for 3, 4, 5, and 6 sets of cells in series. The slope and y-intercept are determined from the linear regression of the maximum current plotted against the number of cells in parallel.

| Number of Cells in Series | Number of Cells in Parallel | Maximum Current (μA) | Slope  | Y-Intercept |
|---------------------------|-----------------------------|----------------------|--------|-------------|
| 3                         | 2                           | 706                  | 267.71 | 106.36      |
|                           | 3                           | 823                  |        |             |
|                           | 4                           | 1173                 |        |             |
|                           | 5                           | 1453                 |        |             |
|                           | 6                           | 1730                 |        |             |
| 4                         | 1                           | 306                  | 205.83 | 117.19      |
|                           | 2                           | 553                  |        |             |
|                           | 3                           | 738                  |        |             |
|                           | 4                           | 930                  |        |             |
| 5                         | 1                           | 273                  | 250.33 | 91.89       |
|                           | 2                           | 732                  |        |             |
|                           | 3                           | 773                  |        |             |
| 6                         | 1                           | 292                  | 180.00 | 204.00      |
|                           | 2                           | 748                  |        |             |
|                           | 3                           | 652                  |        |             |

The calculated slopes (Table S42) for each set of cells in parallel are then plotted against the number of cells in series, and, in a separate graph, the calculated y-intercepts (Table S42) are plotted against the number of cells in series. The linear regression for the plotted slopes versus number of cells in series give the equation  $A = m_1(P \times S) + b_1(P)$ , and the linear regression for the plotted intercepts versus the number of cells in parallel gives the equation  $A = m_2(S) + b_2$ . The two calculated equations are then combined to provide the final equation  $A_2 = -21.8(S \times P) + 26.8(S) + 324.4(P) + 9.4$ , which is the predicted maximum current for Design Type 2.

**Predicting Current Decay Rates**

For all of the following calculations,  $D$  is the decay rate in  $\mu\text{A}/\text{min}$ ,  $P$  is the number of cells in parallel,  $S$  is the number of cells in series,  $m$  is the slope of the linear regression, and  $b$  is the y-intercept of the linear regression. Decay rates for each device tested are determined by measuring the slope of the linear region of decay directly following the maximum current measured from a plot of current versus time.

**Design Type 2.** The measured decay rate for Design Type 2 devices containing 3 sets of cells in series were plotted against the number of cells in parallel. The linear regression of the decay rates versus the number of cells in parallel gives the equation  $D = m(P) + b$ . The linear regression for this plot was then determined and the slope and y-intercept were recorded. This process was repeated for Design Type 2 devices containing 4, and 5 sets of cells in series; the values from the linear regression analyses are recorded in Table S43.

**Table S43.** Measured decay rate for Design Type 2 devices plotted against the number cells in parallel for 3, 4, and 5 sets of cells in series. The slope and y-intercept are determined from the linear regression of the maximum current plotted against the number of cells in parallel.

| Number of Cells in Series | Number of Cells in Parallel | Decay Rate ( $\mu\text{A}/\text{min}$ ) | Slope | Y-Intercept |
|---------------------------|-----------------------------|-----------------------------------------|-------|-------------|
| 3                         | 1                           | -138.4                                  | -46.3 | -19.3       |
|                           | 2                           | -172.9                                  |       |             |
|                           | 4                           | -162.0                                  |       |             |
|                           | 5                           | -189.6                                  |       |             |
|                           | 6                           | -361.7                                  |       |             |
| 4                         | 1                           | -55.3                                   | -33.0 | -28.2       |
|                           | 2                           | -114.1                                  |       |             |
|                           | 3                           | -104.7                                  |       |             |
|                           | 4                           | -168.4                                  |       |             |
| 5                         | 1                           | -52.5                                   | -34.2 | -35.4       |
|                           | 2                           | -137.9                                  |       |             |
|                           | 3                           | -120.8                                  |       |             |

The calculated slopes (Table S43) for each set of cells in parallel are then plotted against the number of cells in series, and, in a separate graph, the calculated y-intercepts (Table S43) are plotted against the number of cells in series. The linear regression for the plotted slopes versus number of cells in series give the equation  $D = m_1(P \times S) + b_1(P)$ , and the linear regression for the plotted intercepts versus the number of cells in series gives the equation  $D = m_2(S) + b_2$ . The two calculated equations are then combined to provide the final equation  $D = 6.1(S \times P) - 62.2(P) - 8.1(S) + 4.6$ , which is the predicted decay rate for Design Type 2.

## References

- 1) Noh, H.; Phillips, S. T., *Anal. Chem.* **2010**, 82, 8071–8078.
- 2) Martinez, A. W.; Phillips, S. T.; Whitesides, G. M., *Proc. Natl. Acad. Sci., U. S. A.*, **2008**, 105, 19606–19611.
- 3) Martinez, A. W.; Phillips, S. T.; Thomas, S. W.; Sindi, H.; Whitesides, G. M. *Anal. Chem.*, **2008**, 80, 3699–3707.
- 4) (a) Burd, J. F. *Eur. Pat. Appl.* (1983), EP 88974 A2 19830921; (b) Oster, G.; Davis, B. J. *Eur. Pat. Appl.* (1990), EP 383126 A2 19900822.
